# Supplementary material for: Copper-catalyzed trifluoromethylation of alkenes: synthesis of trifluoromethylated benzoxazines
Source: Royal Society of Chemistry journal article supplement (doi:10.1039/c5ob01196e), 2015-01-01

Supporting Information

# Copper-Catalyzed Trifluoromethylation of Alkenes: Synthesis of Trifluoromethylated Benzoxazines

Sadhan Jana, Athira Ashokan, Shailesh Kumar, Ajay Verma, and Sangit Kumar\*

Department of Chemistry, Indian Institute of Science Education and Research (IISER) Bhopal,  
Indore By-pass Road, Bhauri, Bhopal, Madhya Pradesh, India, Pin: 462 066

E-mail: [sangitkumar@iiserb.ac.in](mailto:sangitkumar@iiserb.ac.in)

|                                                              | Page  |
|--------------------------------------------------------------|-------|
| Table of Contents                                            | S1    |
| HRMS spectra of substrates and CF <sub>3</sub> -benzoxazines | S2-S0 |

## Display Report

### Analysis Info

Analysis Name D:\Data\user data\2015\MAY-2015\14-MAY-2015\Dr.S.Kumar-AA-86\_1-B,3\_01\_2503.d  
Method HRLCMS-20 Sept.m  
Sample Name Dr.S.Kumar-AA-86  
Comment

Acquisition Date 5/14/2015 2:34:55 PM

Operator RUCHI

Instrument micrOTOF-Q II 10330

### Acquisition Parameter

|             |          |                       |           |                  |           |
|-------------|----------|-----------------------|-----------|------------------|-----------|
| Source Type | ESI      | Ion Polarity          | Positive  | Set Nebulizer    | 1.2 Bar   |
| Focus       | Active   | Set Capillary         | 4500 V    | Set Dry Heater   | 200 °C    |
| Scan Begin  | 50 m/z   | Set End Plate Offset  | -500 V    | Set Dry Gas      | 7.0 l/min |
| Scan End    | 3000 m/z | Set Collision Cell RF | 130.0 Vpp | Set Divert Valve | Waste     |

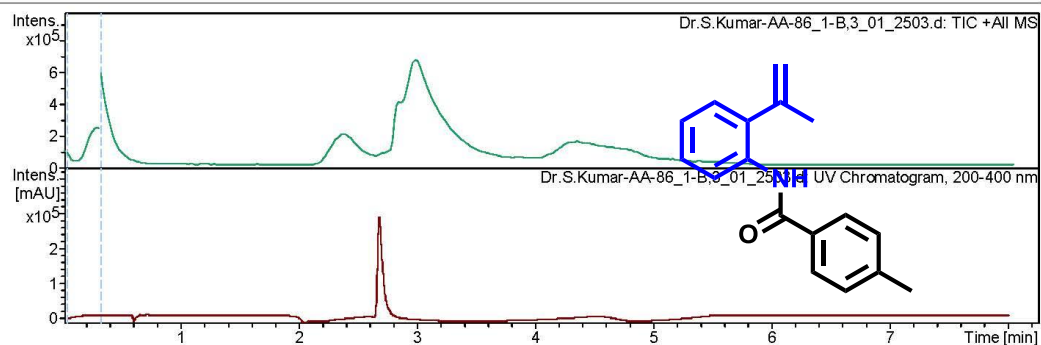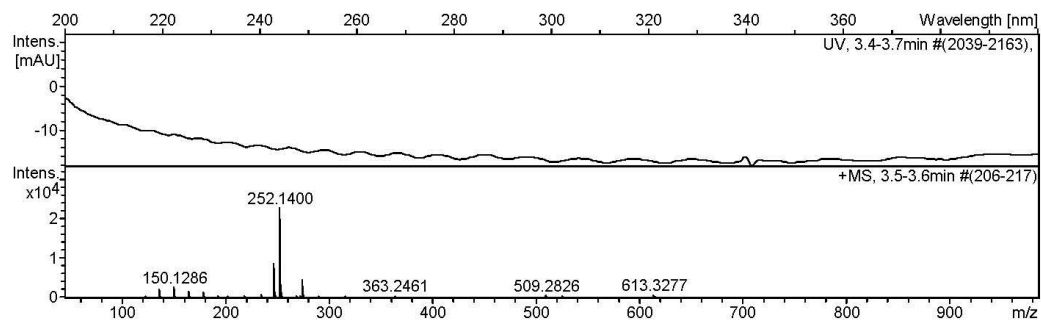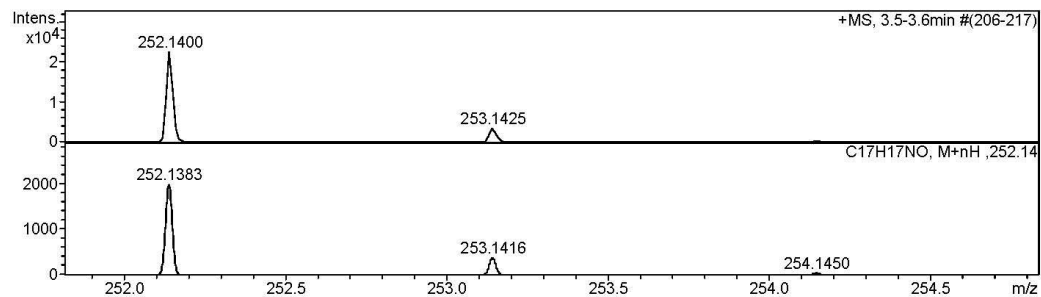

## Display Report

### Analysis Info

|                  |                                                                                    |
|------------------|------------------------------------------------------------------------------------|
| Analysis Name    | D:\Data\user data\2015\MARCH-2015\05-mar-2015\Dr.S.Kumar-SJ-AA-122_1-A,3_01_1818.d |
| Method           | HRLCMS-20 Sept.m                                                                   |
| Sample Name      | Dr.S.Kumar-SJ-AA-122                                                               |
| Comment          |                                                                                    |
| Acquisition Date | 3/5/2015 12:33:52 PM                                                               |
| Operator         | RUCHI                                                                              |
| Instrument       | microTOF-Q II 10330                                                                |

### Acquisition Parameter

|             |          |                       |           |
|-------------|----------|-----------------------|-----------|
| Source Type | ESI      | Ion Polarity          | Positive  |
| Focus       | Active   | Set Capillary         | 4500 V    |
| Scan Begin  | 50 m/z   | Set End Plate Offset  | -500 V    |
| Scan End    | 3000 m/z | Set Collision Cell RF | 130.0 Vpp |
|             |          | Set Nebulizer         | 1.2 Bar   |
|             |          | Set Dry Heater        | 200 °C    |
|             |          | Set Dry Gas           | 7.0 l/min |
|             |          | Set Divert Valve      | Waste     |

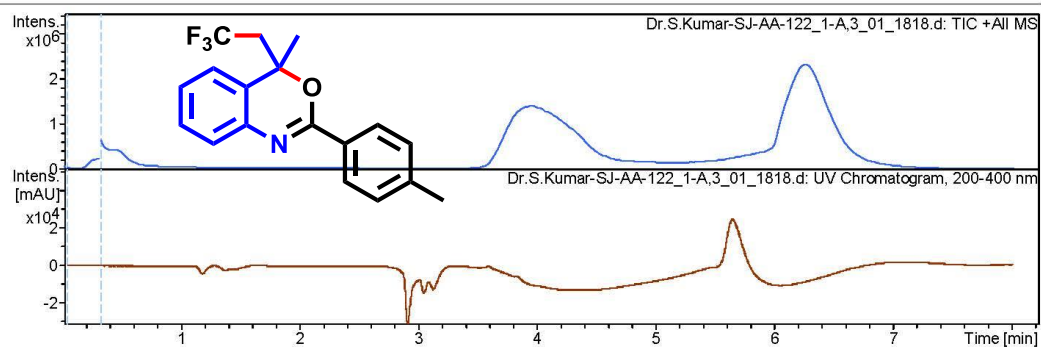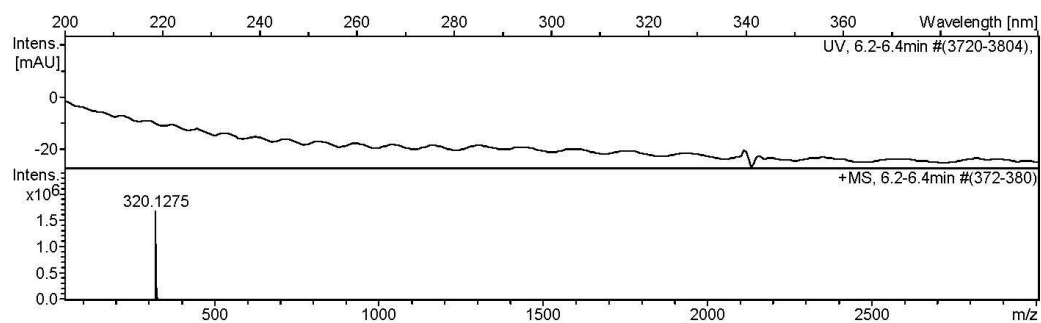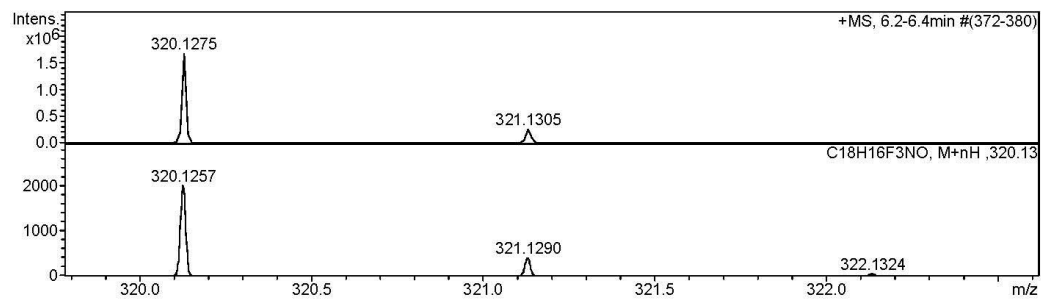

## Display Report

### Analysis Info

|               |                                                                                    |
|---------------|------------------------------------------------------------------------------------|
| Analysis Name | D:\Data\user data\2015\MARCH-2015\05-mar-2015\Dr.S.Kumar-SJ-AA-123_1-A,4_01_1819.d |
| Method        | HRLCMS-20 Sept.m                                                                   |
| Sample Name   | Dr.S.Kumar-SJ-AA-123                                                               |
| Comment       |                                                                                    |

Acquisition Date 3/5/2015 12:43:04 PM

Operator RUCHI

Instrument microTOF-Q II 10330

### Acquisition Parameter

|             |          |                       |           |
|-------------|----------|-----------------------|-----------|
| Source Type | ESI      | Ion Polarity          | Positive  |
| Focus       | Active   | Set Capillary         | 4500 V    |
| Scan Begin  | 50 m/z   | Set End Plate Offset  | -500 V    |
| Scan End    | 3000 m/z | Set Collision Cell RF | 130.0 Vpp |
|             |          | Set Nebulizer         | 1.2 Bar   |
|             |          | Set Dry Heater        | 200 °C    |
|             |          | Set Dry Gas           | 7.0 l/min |
|             |          | Set Divert Valve      | Waste     |

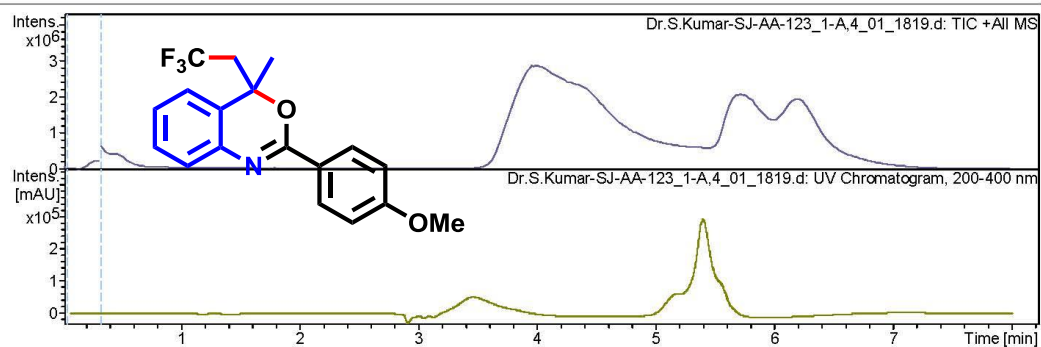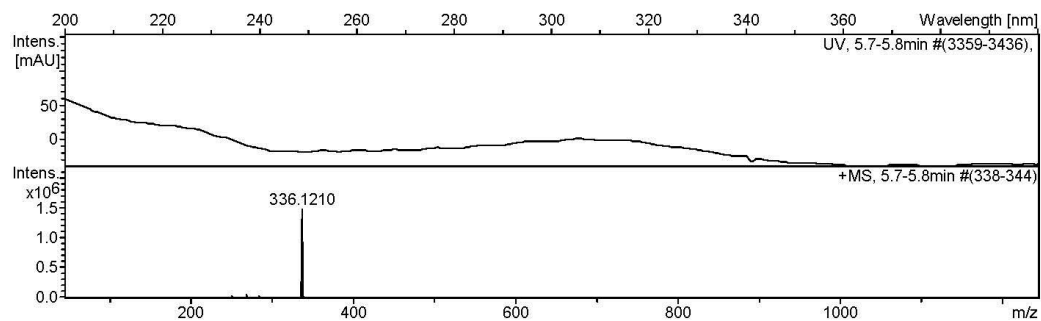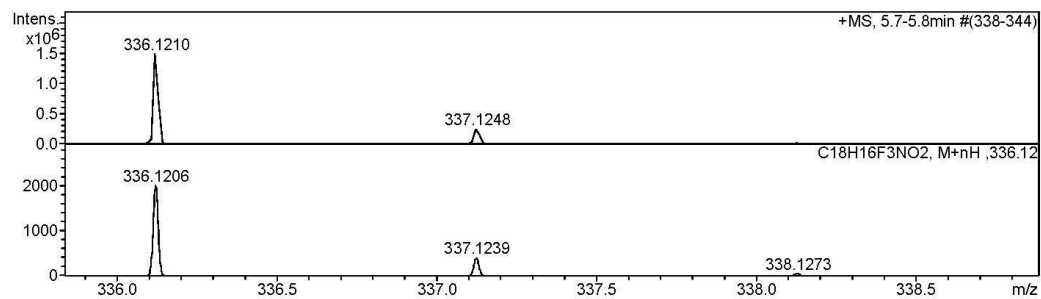



## Display Report

### Analysis Info

|                  |                                                                               |
|------------------|-------------------------------------------------------------------------------|
| Analysis Name    | D:\Data\user data\2015\MAY-2015\13-MAY-2015\Dr.S.Kumar-SJ-260_1-A,7_01_2462.d |
| Method           | HRLCMS-20 Sept.m                                                              |
| Sample Name      | Dr.S.Kumar-SJ-260                                                             |
| Comment          |                                                                               |
| Acquisition Date | 5/13/2015 12:41:40 PM                                                         |
| Operator         | RUCHI                                                                         |
| Instrument       | microTOF-Q II 10330                                                           |

### Acquisition Parameter

|             |          |                       |           |
|-------------|----------|-----------------------|-----------|
| Source Type | ESI      | Ion Polarity          | Positive  |
| Focus       | Active   | Set Capillary         | 4500 V    |
| Scan Begin  | 50 m/z   | Set End Plate Offset  | -500 V    |
| Scan End    | 3000 m/z | Set Collision Cell RF | 130.0 Vpp |
|             |          | Set Nebulizer         | 1.2 Bar   |
|             |          | Set Dry Heater        | 200 °C    |
|             |          | Set Dry Gas           | 7.0 l/min |
|             |          | Set Divert Valve      | Waste     |

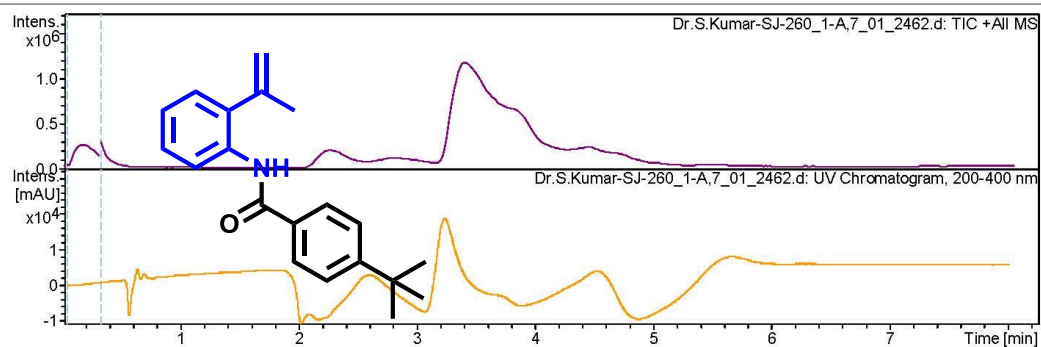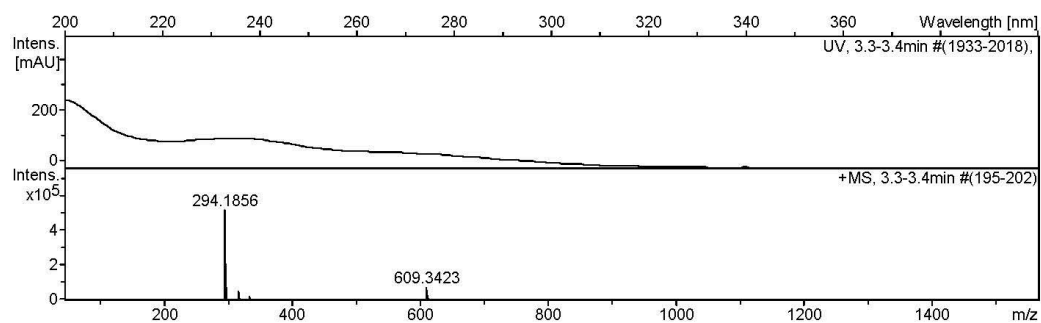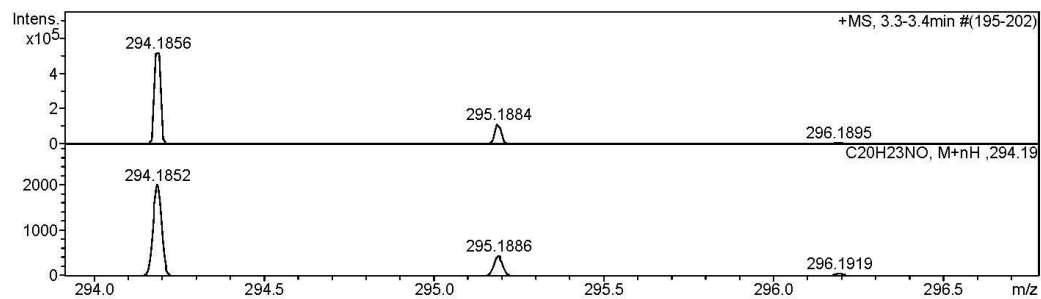

## Display Report

### Analysis Info

|                  |                                                                                 |
|------------------|---------------------------------------------------------------------------------|
| Analysis Name    | D:\Data\user data\2015\MARCH-2015\16 MAR-2015\Dr.S.Kumar-SJ-314_1-A,7_01_1888.d |
| Method           | HRLCMS-20 Sept.m                                                                |
| Sample Name      | Dr.S.Kumar-SJ-314                                                               |
| Comment          |                                                                                 |
| Acquisition Date | 3/16/2015 2:23:37 PM                                                            |
| Operator         | RUCHI                                                                           |
| Instrument       | microTOF-Q II 10330                                                             |

### Acquisition Parameter

|             |          |                       |           |
|-------------|----------|-----------------------|-----------|
| Source Type | ESI      | Ion Polarity          | Positive  |
| Focus       | Active   | Set Capillary         | 4500 V    |
| Scan Begin  | 50 m/z   | Set End Plate Offset  | -500 V    |
| Scan End    | 3000 m/z | Set Collision Cell RF | 130.0 Vpp |
|             |          | Set Nebulizer         | 1.2 Bar   |
|             |          | Set Dry Heater        | 200 °C    |
|             |          | Set Dry Gas           | 7.0 l/min |
|             |          | Set Divert Valve      | Waste     |

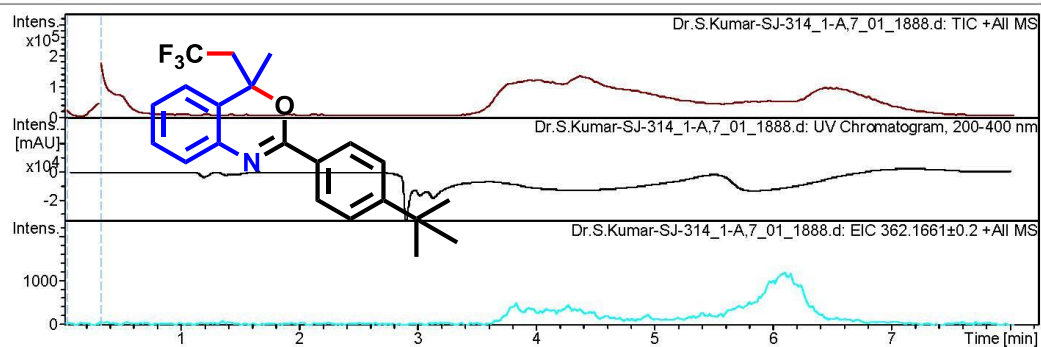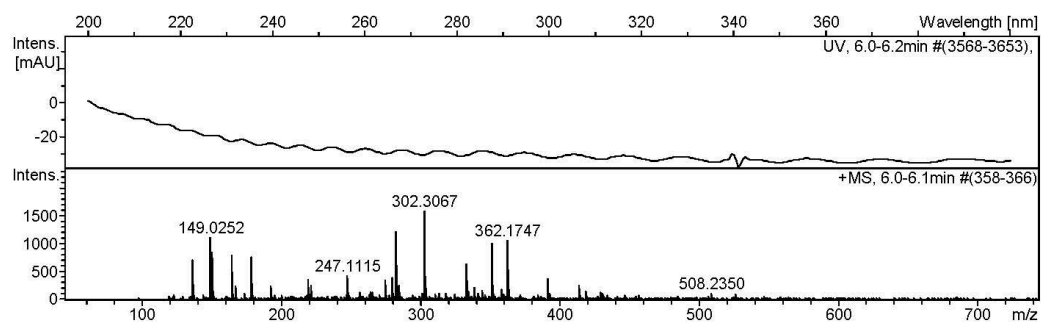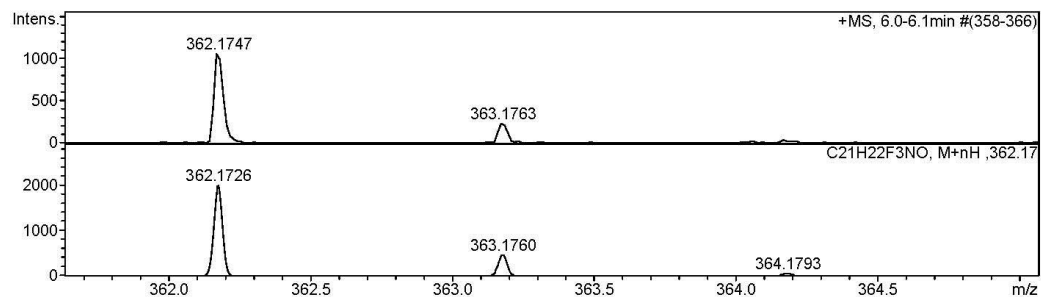

## Display Report

### Analysis Info

|               |                                                                               |
|---------------|-------------------------------------------------------------------------------|
| Analysis Name | D:\Data\user data\2015\MAY-2015\13-MAY-2015\Dr.S.Kumar-SJ-250_1-A,4_01_2458.d |
| Method        | HRLCMS-20 Sept.m                                                              |
| Sample Name   | Dr.S.Kumar-SJ-250                                                             |
| Comment       |                                                                               |

Acquisition Date 5/13/2015 12:01:56 PM

Operator RUCHI

Instrument microTOF-Q II 10330

### Acquisition Parameter

|             |          |                       |           |
|-------------|----------|-----------------------|-----------|
| Source Type | ESI      | Ion Polarity          | Positive  |
| Focus       | Active   | Set Capillary         | 4500 V    |
| Scan Begin  | 50 m/z   | Set End Plate Offset  | -500 V    |
| Scan End    | 3000 m/z | Set Collision Cell RF | 130.0 Vpp |
|             |          | Set Nebulizer         | 1.2 Bar   |
|             |          | Set Dry Heater        | 200 °C    |
|             |          | Set Dry Gas           | 7.0 l/min |
|             |          | Set Divert Valve      | Waste     |

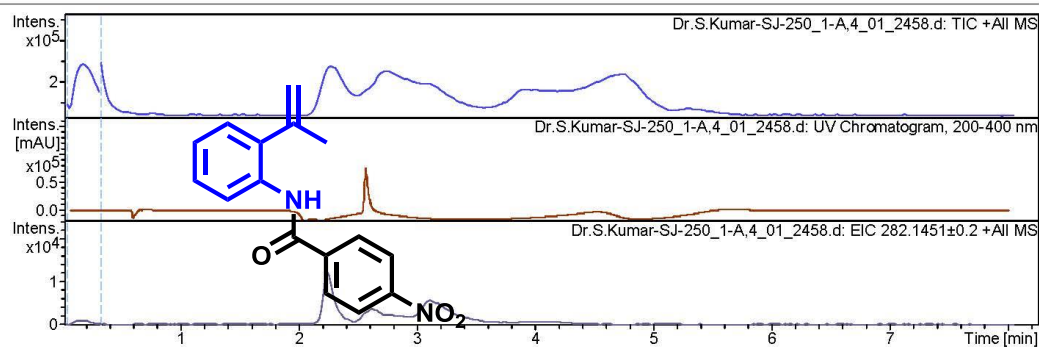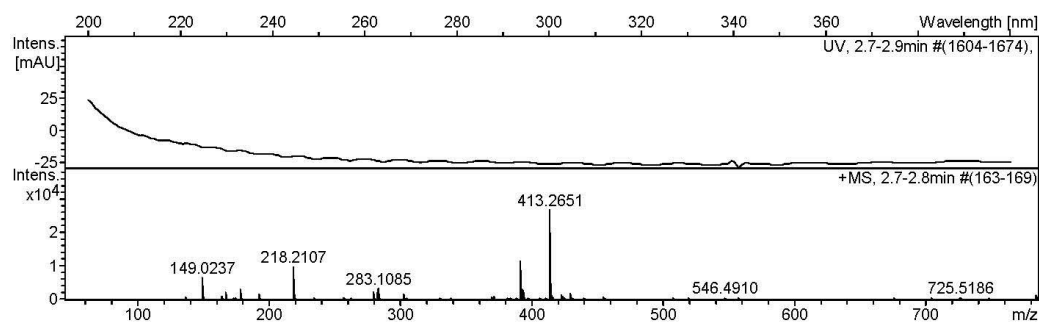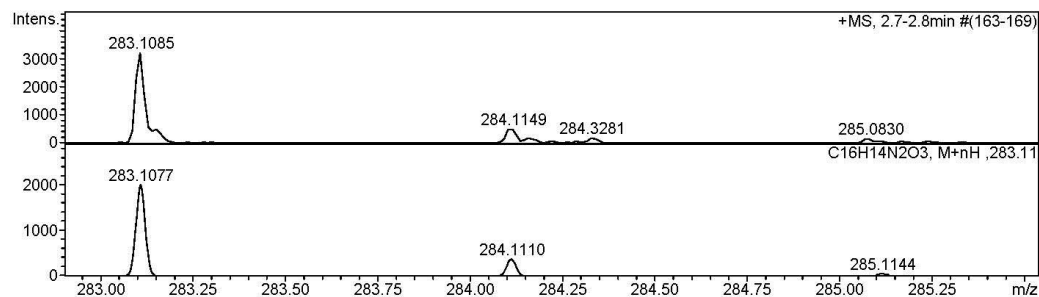

## Display Report

### Analysis Info

|               |                                                                                 |
|---------------|---------------------------------------------------------------------------------|
| Analysis Name | D:\Data\user data\2015\MARCH-2015\16 MAR-2015\Dr.S.Kumar-SJ-313_1-A,6_01_1881.d |
| Method        | HRLCMS-20 Sept.m                                                                |
| Sample Name   | Dr.S.Kumar-SJ-313                                                               |
| Comment       |                                                                                 |

Acquisition Date 3/16/2015 12:41:22 PM

Operator RUCHI

Instrument microTOF-Q II 10330

### Acquisition Parameter

|             |          |                       |           |
|-------------|----------|-----------------------|-----------|
| Source Type | ESI      | Ion Polarity          | Positive  |
| Focus       | Active   | Set Capillary         | 4500 V    |
| Scan Begin  | 50 m/z   | Set End Plate Offset  | -500 V    |
| Scan End    | 3000 m/z | Set Collision Cell RF | 130.0 Vpp |
|             |          | Set Nebulizer         | 1.2 Bar   |
|             |          | Set Dry Heater        | 200 °C    |
|             |          | Set Dry Gas           | 7.0 l/min |
|             |          | Set Divert Valve      | Waste     |

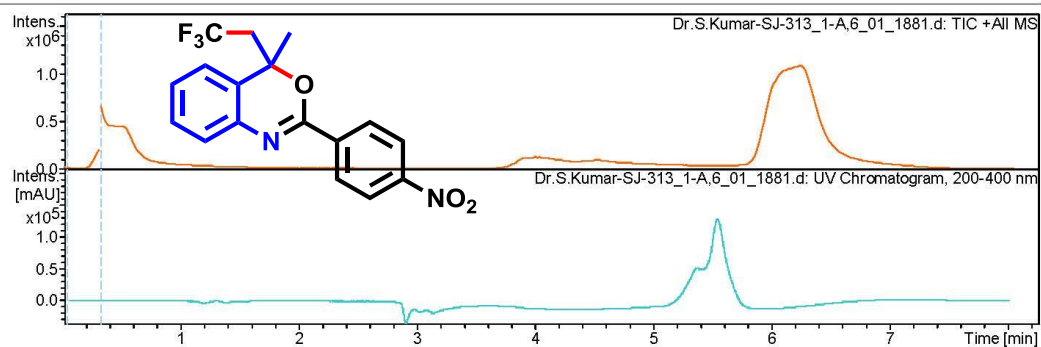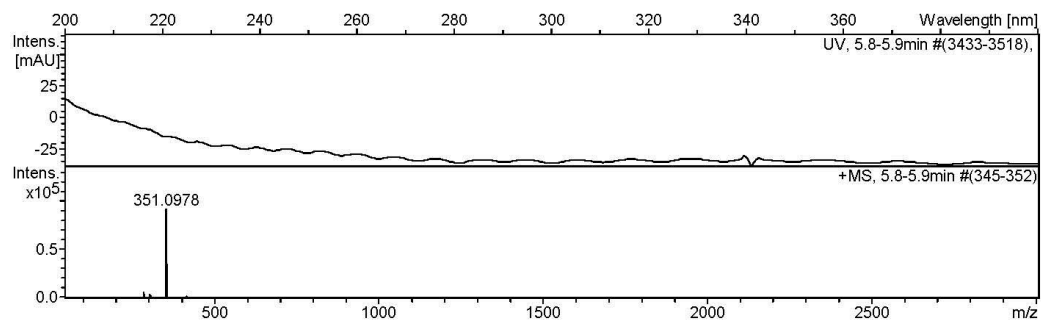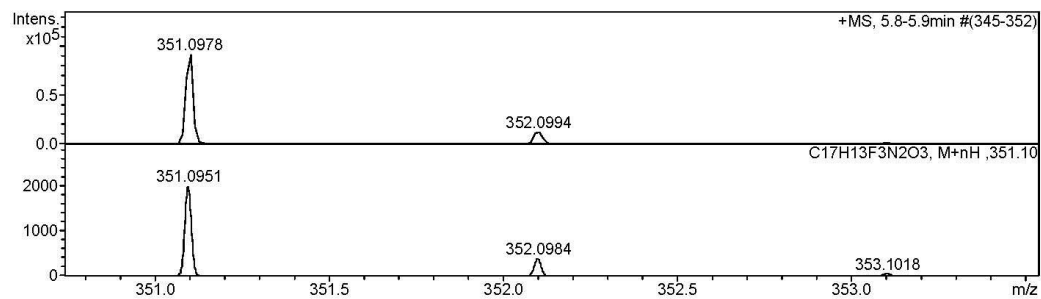

## Display Report

### Analysis Info

|                  |                                                                               |
|------------------|-------------------------------------------------------------------------------|
| Analysis Name    | D:\Data\user data\2015\MAY-2015\13-MAY-2015\Dr.S.Kumar-SJ-264_1-A,8_01_2463.d |
| Method           | HRLCMS-20 Sept.m                                                              |
| Sample Name      | Dr.S.Kumar-SJ-264                                                             |
| Comment          |                                                                               |
| Acquisition Date | 5/13/2015 12:50:51 PM                                                         |
| Operator         | RUCHI                                                                         |
| Instrument       | microTOF-Q II 10330                                                           |

### Acquisition Parameter

|             |          |                       |           |
|-------------|----------|-----------------------|-----------|
| Source Type | ESI      | Ion Polarity          | Positive  |
| Focus       | Active   | Set Capillary         | 4500 V    |
| Scan Begin  | 50 m/z   | Set End Plate Offset  | -500 V    |
| Scan End    | 3000 m/z | Set Collision Cell RF | 130.0 Vpp |
|             |          | Set Nebulizer         | 1.2 Bar   |
|             |          | Set Dry Heater        | 200 °C    |
|             |          | Set Dry Gas           | 7.0 l/min |
|             |          | Set Divert Valve      | Waste     |

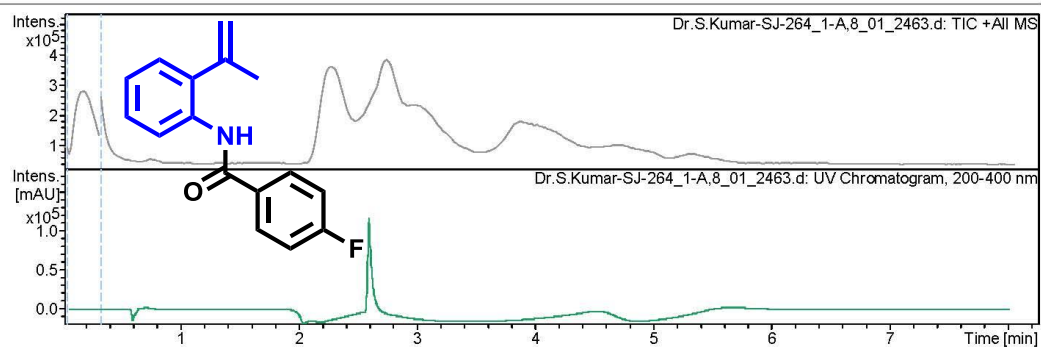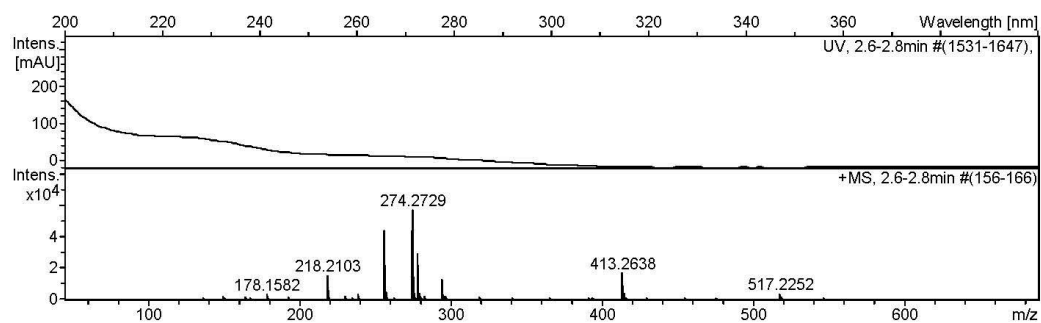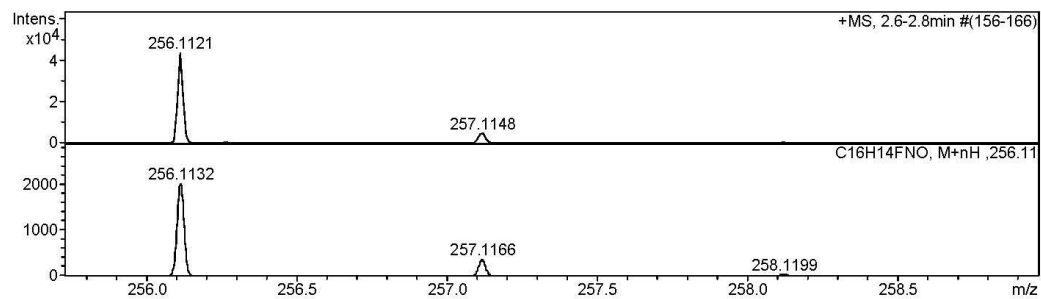

## Display Report

### Analysis Info

|                  |                                                                                    |
|------------------|------------------------------------------------------------------------------------|
| Analysis Name    | D:\Data\user data\2015\MARCH-2015\05-mar-2015\Dr.S.Kumar-SJ-AA-121_1-A,2_01_1817.d |
| Method           | HRLCMS-20 Sept.m                                                                   |
| Sample Name      | Dr.S.Kumar-SJ-AA-121                                                               |
| Comment          |                                                                                    |
| Acquisition Date | 3/5/2015 12:24:42 PM                                                               |
| Operator         | RUCHI                                                                              |
| Instrument       | microTOF-Q II 10330                                                                |

### Acquisition Parameter

|             |          |                       |           |
|-------------|----------|-----------------------|-----------|
| Source Type | ESI      | Ion Polarity          | Positive  |
| Focus       | Active   | Set Capillary         | 4500 V    |
| Scan Begin  | 50 m/z   | Set End Plate Offset  | -500 V    |
| Scan End    | 3000 m/z | Set Collision Cell RF | 130.0 Vpp |
|             |          | Set Nebulizer         | 1.2 Bar   |
|             |          | Set Dry Heater        | 200 °C    |
|             |          | Set Dry Gas           | 7.0 l/min |
|             |          | Set Divert Valve      | Waste     |

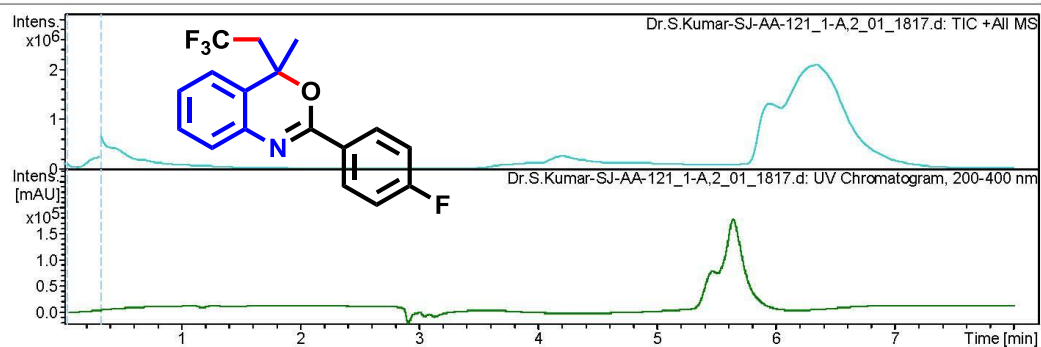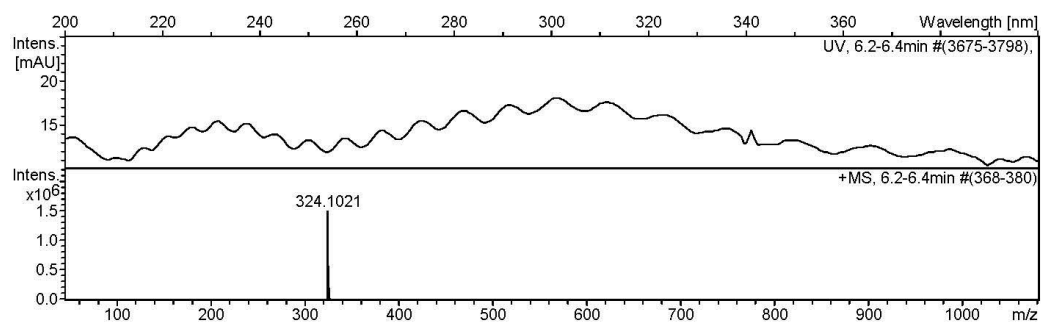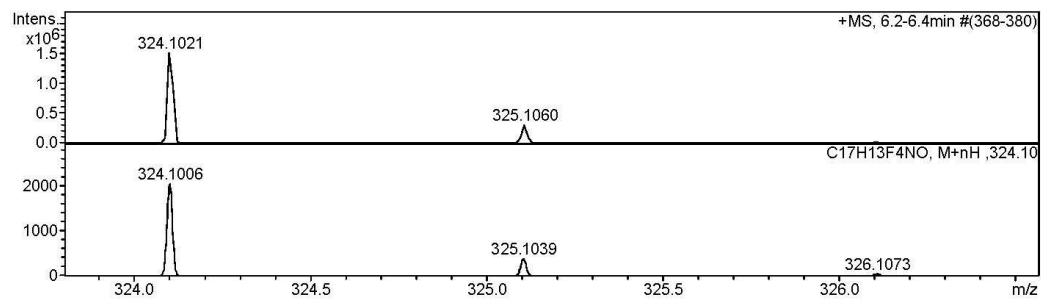

## Display Report

### Analysis Info

Analysis Name D:\Data\user data\2015\April-2015\24-April-2015\Dr.S.Kumar-AA-138.d  
Method tune\_low.m  
Sample Name AA-138  
Comment

Acquisition Date 4/24/2015 4:58:12 PM

Operator RUCHI

Instrument micrOTOF-Q II 10330

### Acquisition Parameter

|             |            |                       |           |                  |           |
|-------------|------------|-----------------------|-----------|------------------|-----------|
| Source Type | ESI        | Ion Polarity          | Positive  | Set Nebulizer    | 0.4 Bar   |
| Focus       | Not active | Set Capillary         | 4600 V    | Set Dry Heater   | 180 °C    |
| Scan Begin  | 50 m/z     | Set End Plate Offset  | -500 V    | Set Dry Gas      | 4.0 l/min |
| Scan End    | 3000 m/z   | Set Collision Cell RF | 130.0 Vpp | Set Divert Valve | Waste     |

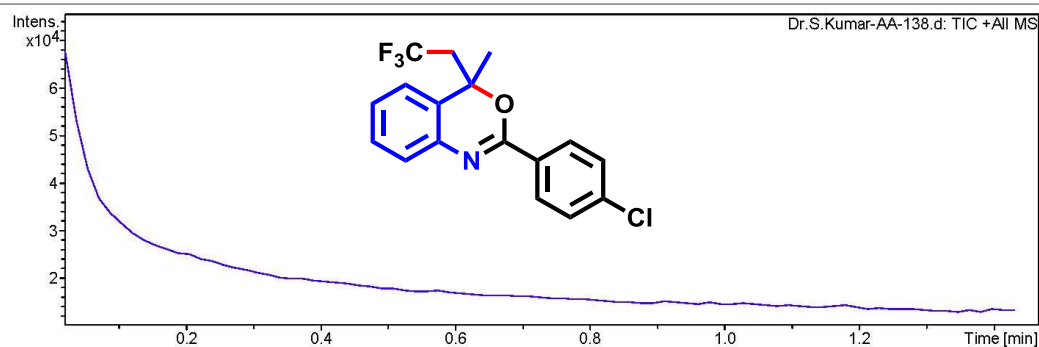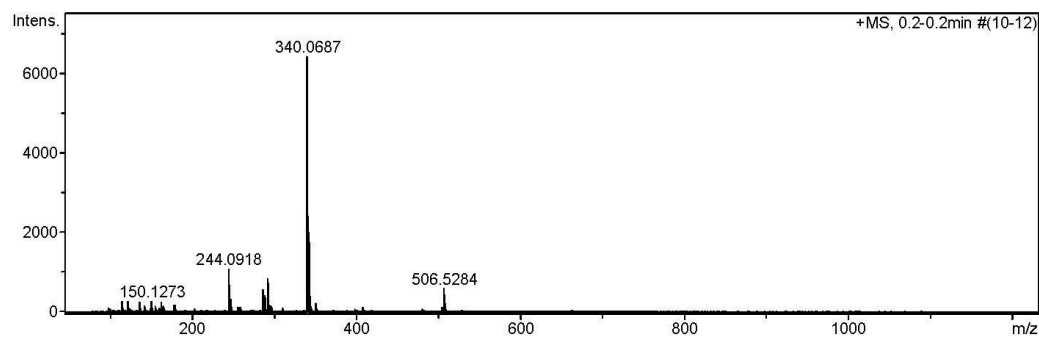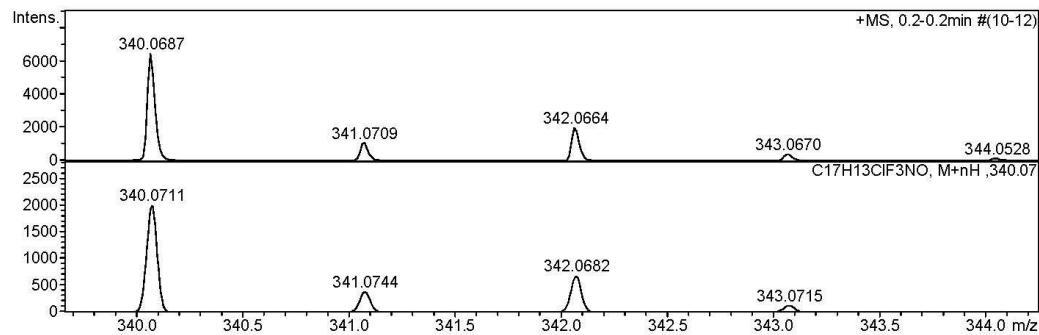

## Display Report

### Analysis Info

Analysis Name D:\Data\user data\2015\MAY-2015\13-MAY-2015\Dr.S.Kumar-SJ-252\_1-A,5\_01\_2459.d  
Method HRLCMS-20 Sept.m  
Sample Name Dr.S.Kumar-SJ-252  
Comment

Acquisition Date 5/13/2015 12:11:06 PM

Operator RUCHI

Instrument microTOF-Q II 10330

### Acquisition Parameter

|             |          |                       |           |                  |           |
|-------------|----------|-----------------------|-----------|------------------|-----------|
| Source Type | ESI      | Ion Polarity          | Positive  | Set Nebulizer    | 1.2 Bar   |
| Focus       | Active   | Set Capillary         | 4500 V    | Set Dry Heater   | 200 °C    |
| Scan Begin  | 50 m/z   | Set End Plate Offset  | -500 V    | Set Dry Gas      | 7.0 l/min |
| Scan End    | 3000 m/z | Set Collision Cell RF | 130.0 Vpp | Set Divert Valve | Waste     |

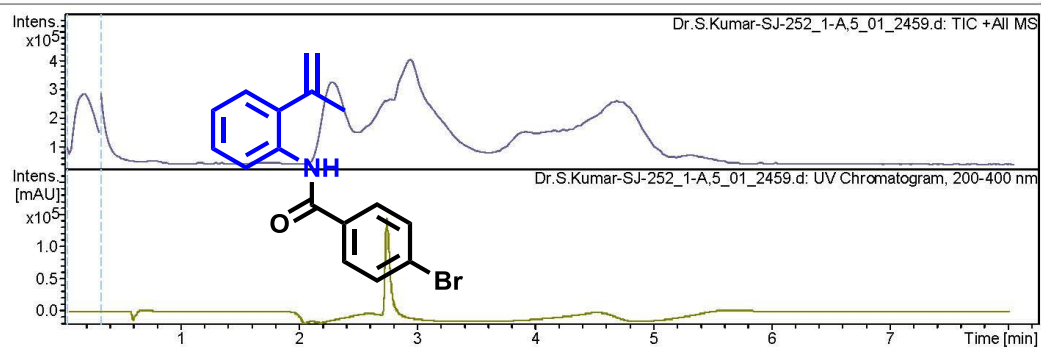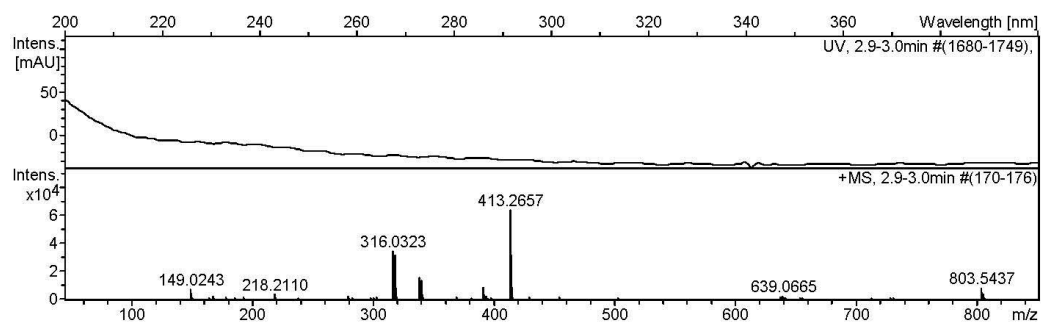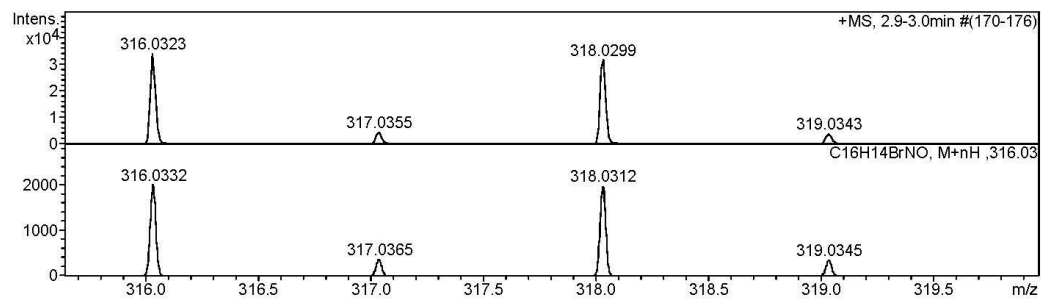



## Display Report

### Analysis Info

|                  |                                                                               |
|------------------|-------------------------------------------------------------------------------|
| Analysis Name    | D:\Data\user data\2015\FEB-2015\26-FEB-2015\Dr.S.Kuamr-AA-118_1-A,3_01_1764.d |
| Method           | HRLCMS-20 Sept.m                                                              |
| Sample Name      | Dr.S.Kuamr-AA-118                                                             |
| Comment          |                                                                               |
| Acquisition Date | 2/26/2015 12:51:02 PM                                                         |
| Operator         | RUCHI                                                                         |
| Instrument       | microTOF-Q II 10330                                                           |

### Acquisition Parameter

|             |          |                       |           |
|-------------|----------|-----------------------|-----------|
| Source Type | ESI      | Ion Polarity          | Positive  |
| Focus       | Active   | Set Capillary         | 4500 V    |
| Scan Begin  | 50 m/z   | Set End Plate Offset  | -500 V    |
| Scan End    | 3000 m/z | Set Collision Cell RF | 130.0 Vpp |
|             |          | Set Nebulizer         | 1.2 Bar   |
|             |          | Set Dry Heater        | 200 °C    |
|             |          | Set Dry Gas           | 7.0 l/min |
|             |          | Set Divert Valve      | Waste     |

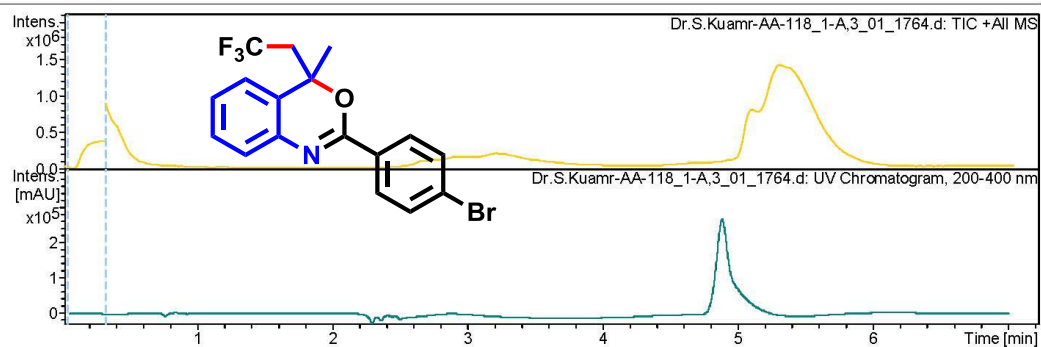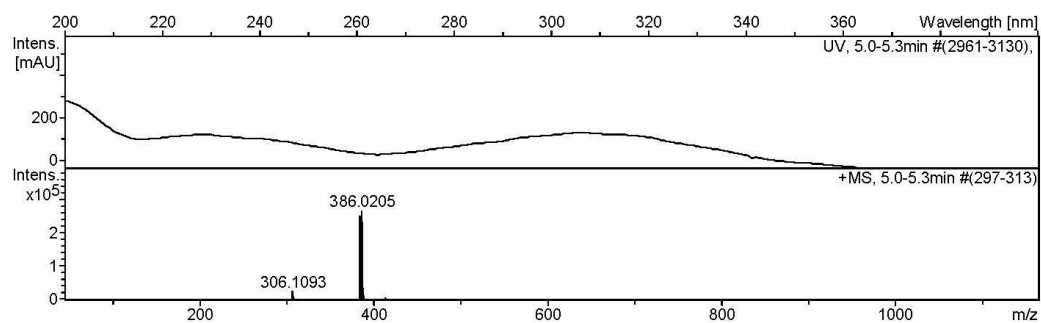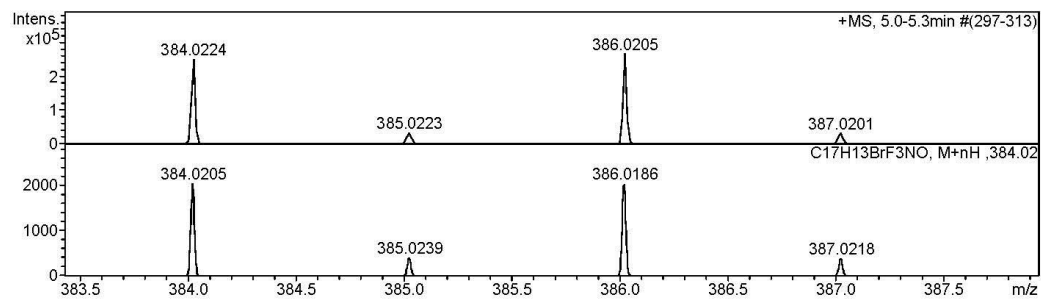

## Display Report

### Analysis Info

|               |                                                                              |
|---------------|------------------------------------------------------------------------------|
| Analysis Name | D:\Data\user data\2015\MAY-2015\14-MAY-2015\Dr.S.Kumar-AA-88_1-B,2_01_2492.d |
| Method        | HRLCMS-20 Sept.m                                                             |
| Sample Name   | Dr.S.Kumar-AA-88                                                             |
| Comment       |                                                                              |

Acquisition Date 5/14/2015 12:24:12 PM

Operator RUCHI

Instrument microTOF-Q II 10330

### Acquisition Parameter

|             |          |                       |           |
|-------------|----------|-----------------------|-----------|
| Source Type | ESI      | Ion Polarity          | Positive  |
| Focus       | Active   | Set Capillary         | 4500 V    |
| Scan Begin  | 50 m/z   | Set End Plate Offset  | -500 V    |
| Scan End    | 3000 m/z | Set Collision Cell RF | 130.0 Vpp |
|             |          | Set Nebulizer         | 1.2 Bar   |
|             |          | Set Dry Heater        | 200 °C    |
|             |          | Set Dry Gas           | 7.0 l/min |
|             |          | Set Divert Valve      | Waste     |

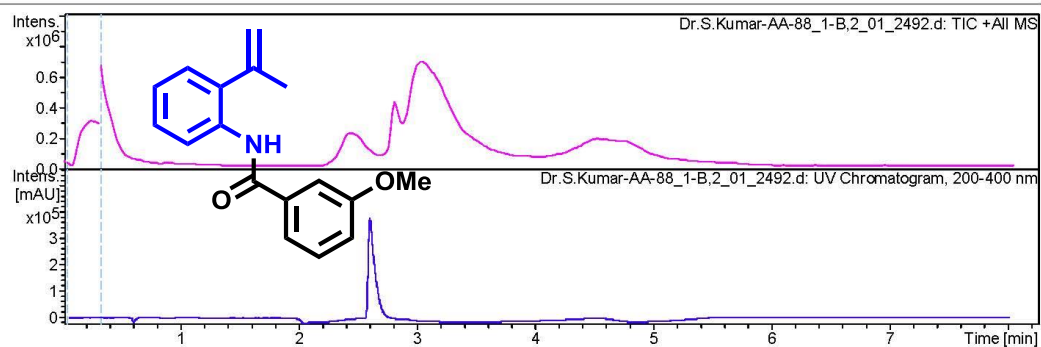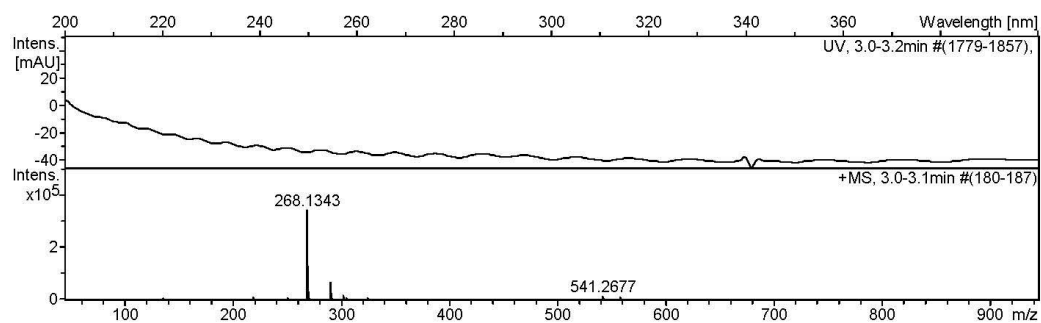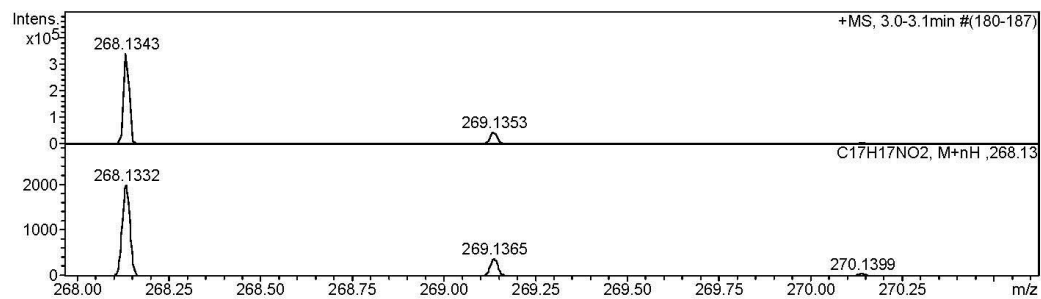

## Display Report

### Analysis Info

|               |                                                                                 |
|---------------|---------------------------------------------------------------------------------|
| Analysis Name | D:\Data\user data\2015\MARCH-2015\24-MAR-2015\Dr.S.Kumar-AA-126_1-A,2_01_2002.d |
| Method        | HRLCMS-20 Sept.m                                                                |
| Sample Name   | Dr.S.Kumar-AA-126                                                               |
| Comment       |                                                                                 |

Acquisition Date 3/24/2015 12:47:14 PM

Operator RUCHI

Instrument microTOF-Q II 10330

### Acquisition Parameter

|             |          |                       |           |
|-------------|----------|-----------------------|-----------|
| Source Type | ESI      | Ion Polarity          | Positive  |
| Focus       | Active   | Set Capillary         | 4500 V    |
| Scan Begin  | 50 m/z   | Set End Plate Offset  | -500 V    |
| Scan End    | 3000 m/z | Set Collision Cell RF | 130.0 Vpp |
|             |          | Set Nebulizer         | 1.2 Bar   |
|             |          | Set Dry Heater        | 200 °C    |
|             |          | Set Dry Gas           | 7.0 l/min |
|             |          | Set Divert Valve      | Waste     |

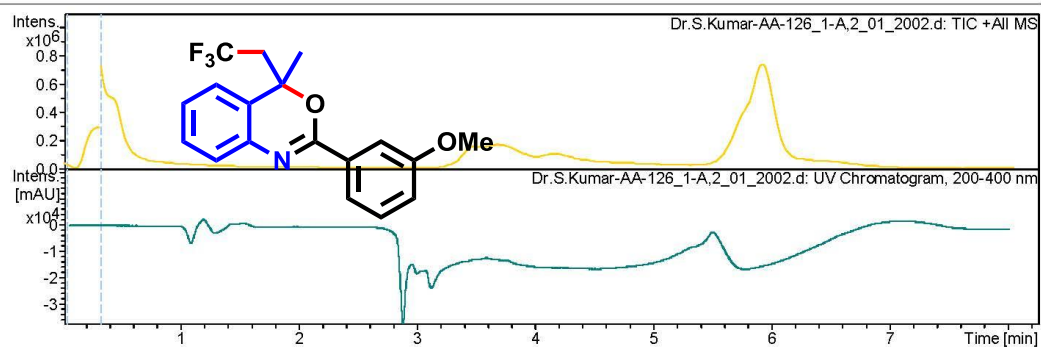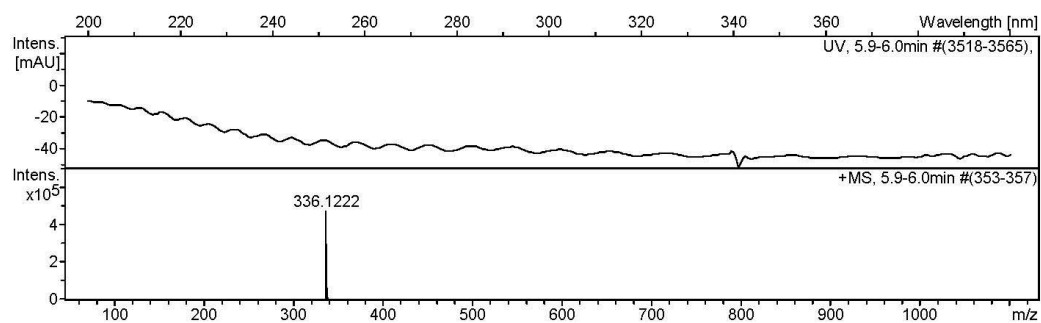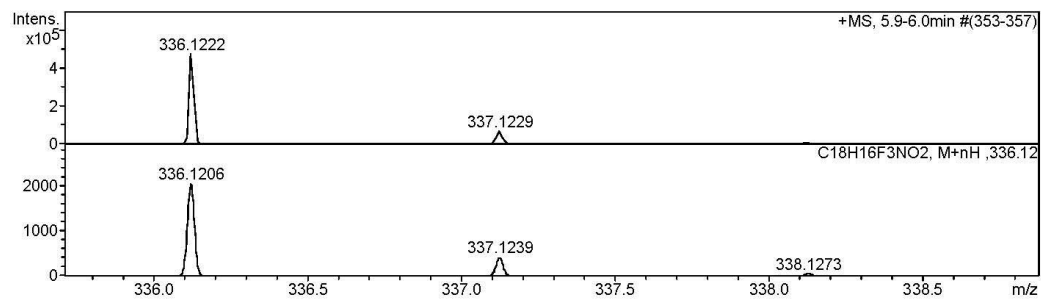

## Display Report

### Analysis Info

Analysis Name D:\Data\user data\2015\MAY-2015\15-MAY-2015\Dr.S.Kumar-AA-105\_1-A,4\_01\_2510.d  
Method HRLCMS-20 Sept.m  
Sample Name Dr.S.Kumar-AA-105  
Comment

Acquisition Date 5/15/2015 11:30:58 AM

Operator RUCHI

Instrument microTOF-Q II 10330

### Acquisition Parameter

|             |          |                       |           |                  |           |
|-------------|----------|-----------------------|-----------|------------------|-----------|
| Source Type | ESI      | Ion Polarity          | Positive  | Set Nebulizer    | 1.2 Bar   |
| Focus       | Active   | Set Capillary         | 4500 V    | Set Dry Heater   | 200 °C    |
| Scan Begin  | 50 m/z   | Set End Plate Offset  | -500 V    | Set Dry Gas      | 7.0 l/min |
| Scan End    | 3000 m/z | Set Collision Cell RF | 130.0 Vpp | Set Divert Valve | Waste     |

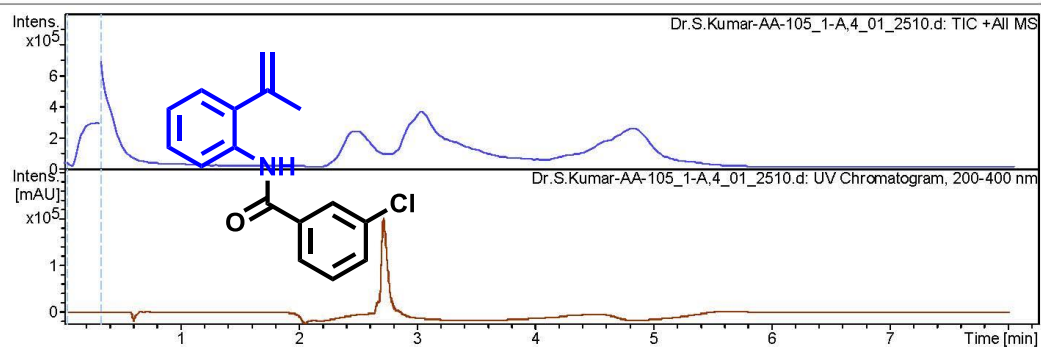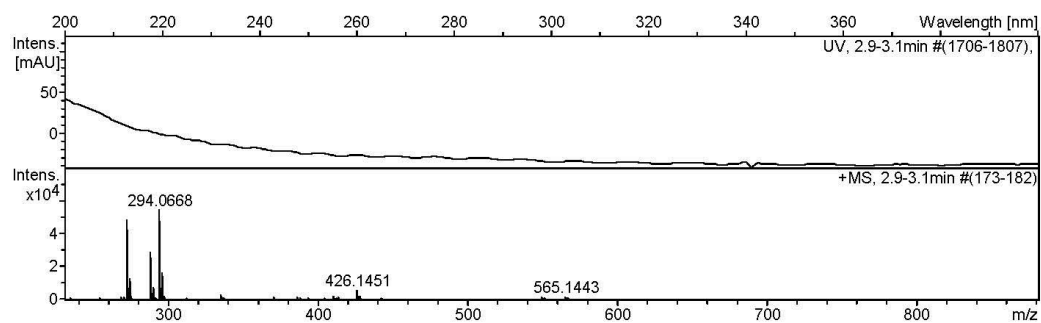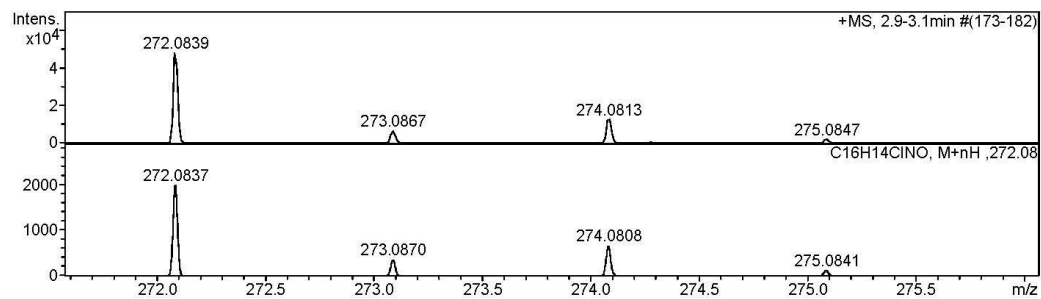

## Display Report

### Analysis Info

|               |                                                                                    |
|---------------|------------------------------------------------------------------------------------|
| Analysis Name | D:\Data\user data\2015\MARCH-2015\19-MAR-2015\Dr.S.Kumar-SJ-AA-125_1-A_5_01_1939.d |
| Method        | HRLCMS-20 Sept tune wide.m                                                         |
| Sample Name   | Dr.S.Kumar-SJ-AA-125                                                               |
| Comment       |                                                                                    |

Acquisition Date 3/19/2015 1:11:31 PM

Operator RUCHI

Instrument microTOF-Q II 10330

### Acquisition Parameter

|             |            |                       |           |
|-------------|------------|-----------------------|-----------|
| Source Type | ESI        | Ion Polarity          | Positive  |
| Focus       | Not active | Set Capillary         | 4500 V    |
| Scan Begin  | 50 m/z     | Set End Plate Offset  | -500 V    |
| Scan End    | 3000 m/z   | Set Collision Cell RF | 600.0 Vpp |
|             |            | Set Nebulizer         | 1.2 Bar   |
|             |            | Set Dry Heater        | 200 °C    |
|             |            | Set Dry Gas           | 7.0 l/min |
|             |            | Set Divert Valve      | Waste     |

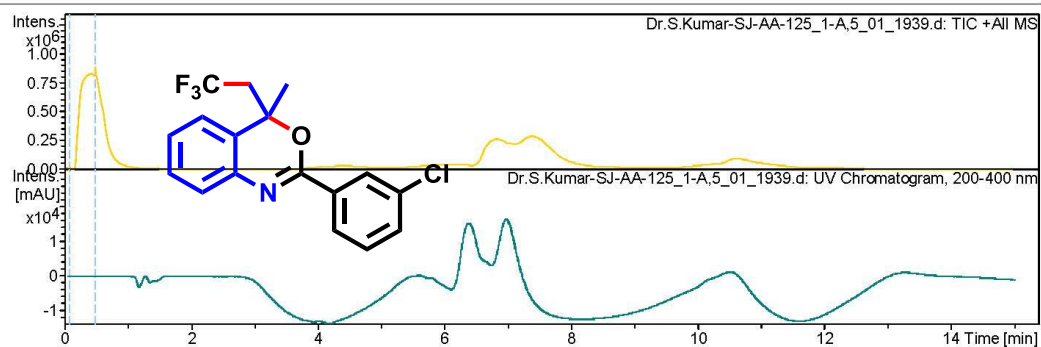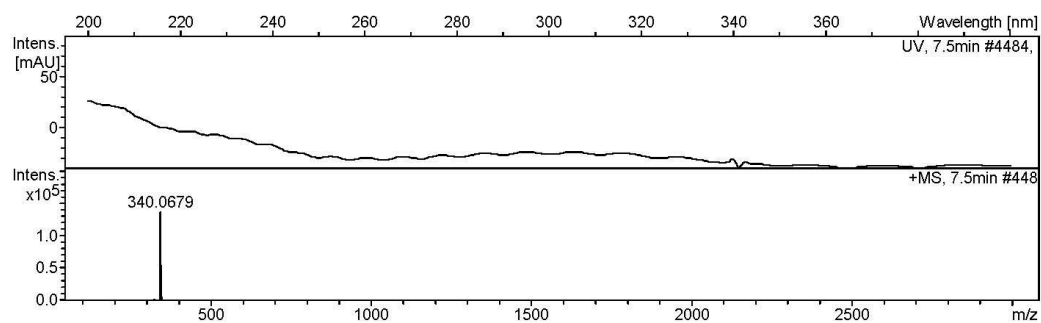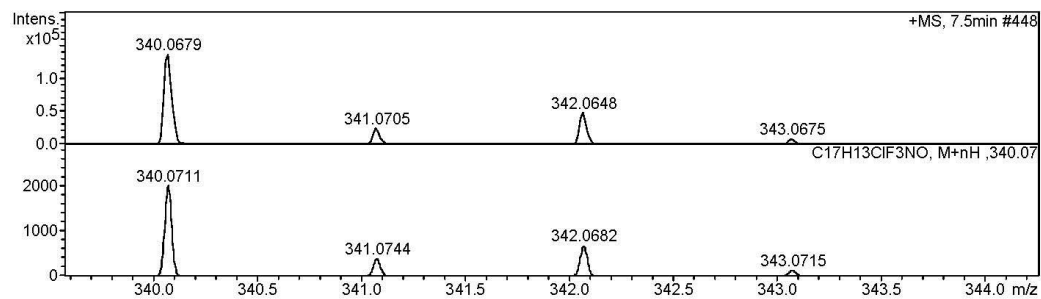

## Display Report

### Analysis Info

Analysis Name D:\Data\user data\2015\MAY-2015\14-MAY-2015\Dr.S.Kumar-SJ-267\_1-B,1\_01\_2491.d  
Method HRLCMS-20 Sept.m  
Sample Name Dr.S.Kumar-SJ-267  
Comment

Acquisition Date 5/14/2015 12:15:03 PM

Operator RUCHI

Instrument microTOF-Q II 10330

### Acquisition Parameter

|             |          |                       |           |                  |           |
|-------------|----------|-----------------------|-----------|------------------|-----------|
| Source Type | ESI      | Ion Polarity          | Positive  | Set Nebulizer    | 1.2 Bar   |
| Focus       | Active   | Set Capillary         | 4500 V    | Set Dry Heater   | 200 °C    |
| Scan Begin  | 50 m/z   | Set End Plate Offset  | -500 V    | Set Dry Gas      | 7.0 l/min |
| Scan End    | 3000 m/z | Set Collision Cell RF | 130.0 Vpp | Set Divert Valve | Waste     |

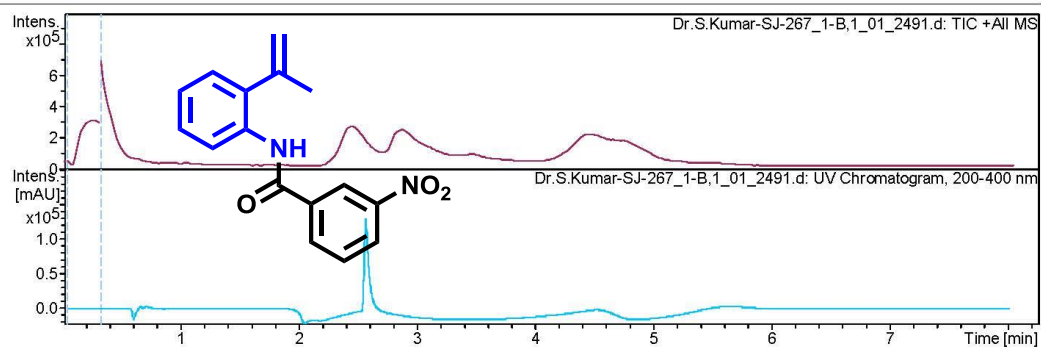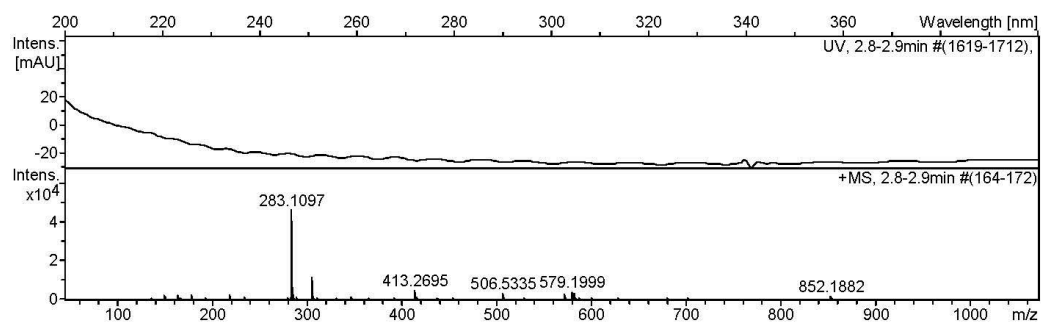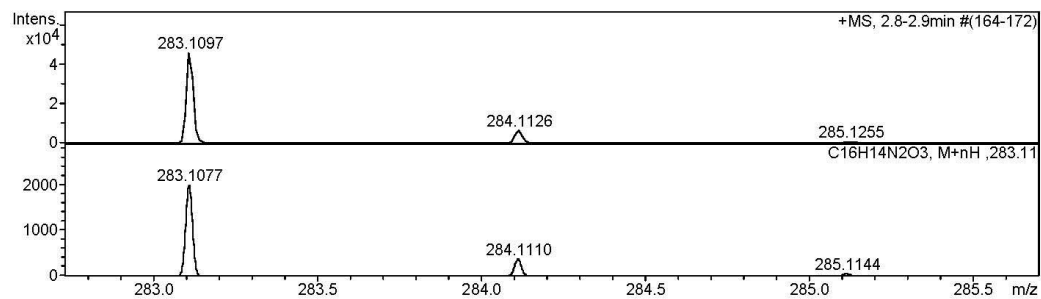

## Display Report

### Analysis Info

|               |                                                                                 |
|---------------|---------------------------------------------------------------------------------|
| Analysis Name | D:\Data\user data\2015\MARCH-2015\16 MAR-2015\Dr.S.Kumar-SJ-317_1-A,8_01_1883.d |
| Method        | HRLCMS-20 Sept.m                                                                |
| Sample Name   | Dr.S.Kumar-SJ-317                                                               |
| Comment       |                                                                                 |

Acquisition Date 3/16/2015 12:59:42 PM

Operator RUCHI

Instrument microTOF-Q II 10330

### Acquisition Parameter

|             |          |                       |           |
|-------------|----------|-----------------------|-----------|
| Source Type | ESI      | Ion Polarity          | Positive  |
| Focus       | Active   | Set Capillary         | 4500 V    |
| Scan Begin  | 50 m/z   | Set End Plate Offset  | -500 V    |
| Scan End    | 3000 m/z | Set Collision Cell RF | 130.0 Vpp |
|             |          | Set Nebulizer         | 1.2 Bar   |
|             |          | Set Dry Heater        | 200 °C    |
|             |          | Set Dry Gas           | 7.0 l/min |
|             |          | Set Divert Valve      | Waste     |

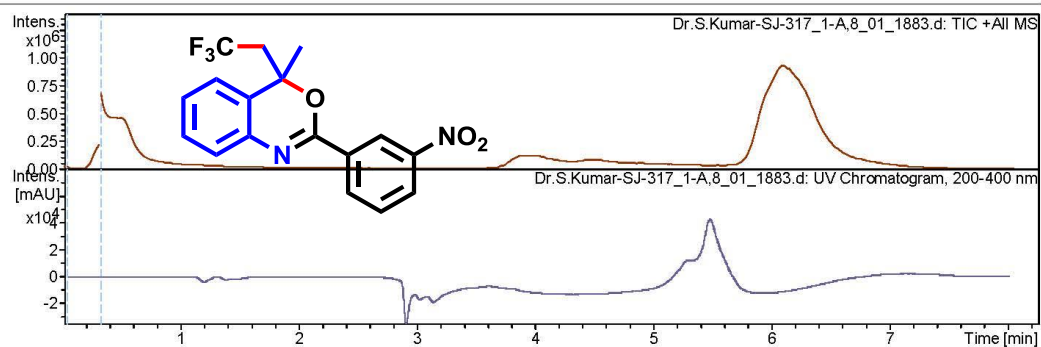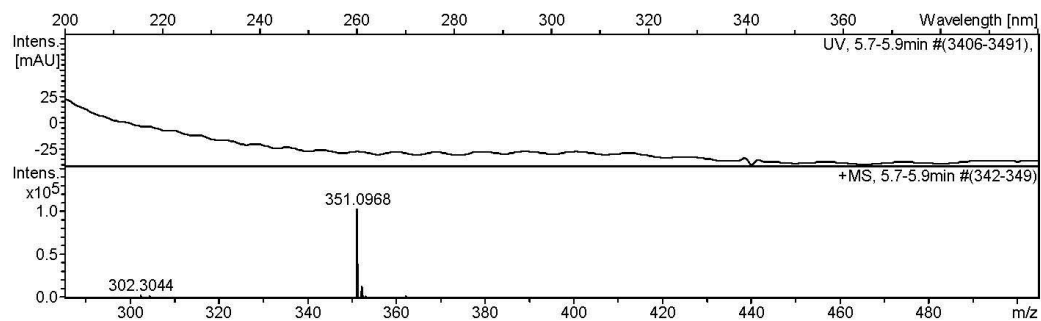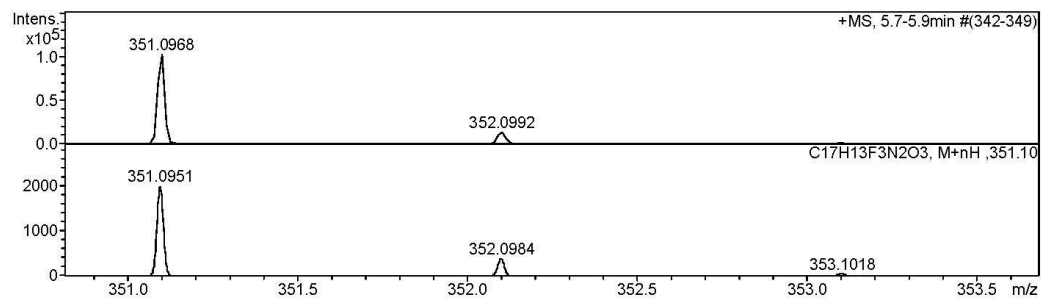

## Display Report

### Analysis Info

Analysis Name D:\Data\user data\2015\MAY-2015\14-MAY-2015\Dr.S.Kumar-AA-62\_1-B,7\_01\_2498.d  
Method HRLCMS-20 Sept.m  
Sample Name Dr.S.Kumar-AA-62  
Comment

Acquisition Date 5/14/2015 1:41:16 PM

Operator RUCHI

Instrument microTOF-Q II 10330

### Acquisition Parameter

|             |          |                       |           |                  |           |
|-------------|----------|-----------------------|-----------|------------------|-----------|
| Source Type | ESI      | Ion Polarity          | Positive  | Set Nebulizer    | 1.2 Bar   |
| Focus       | Active   | Set Capillary         | 4500 V    | Set Dry Heater   | 200 °C    |
| Scan Begin  | 50 m/z   | Set End Plate Offset  | -500 V    | Set Dry Gas      | 7.0 l/min |
| Scan End    | 3000 m/z | Set Collision Cell RF | 130.0 Vpp | Set Divert Valve | Waste     |

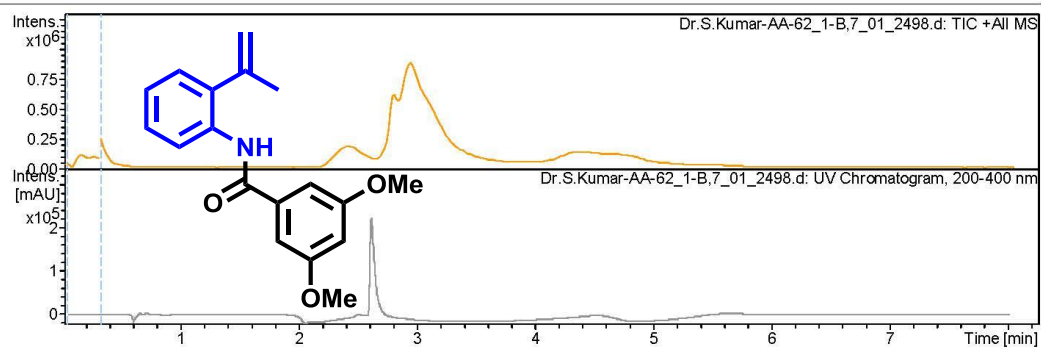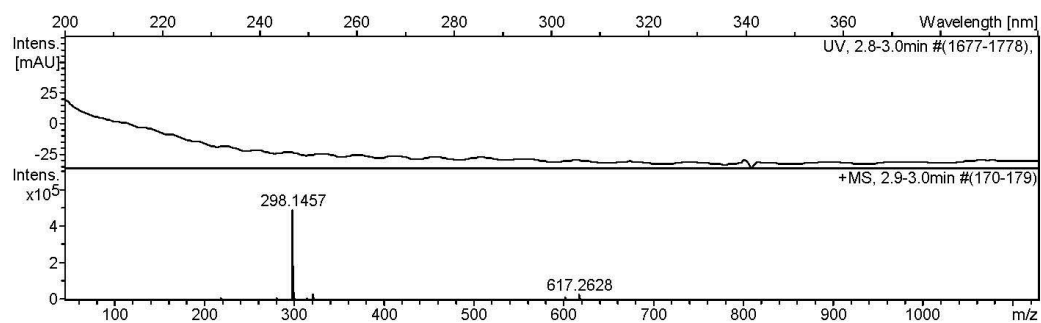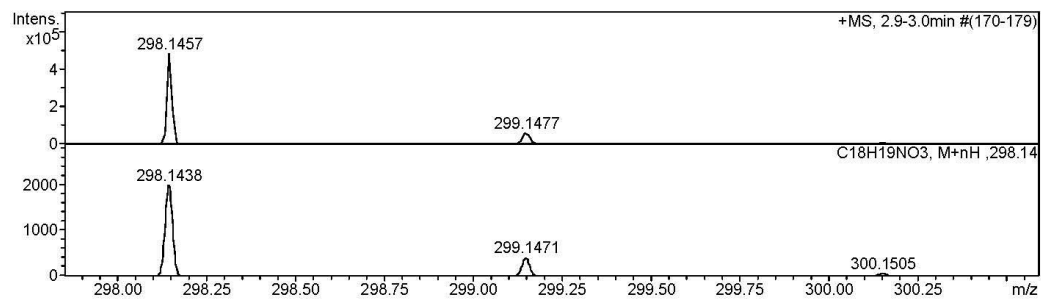



## Display Report

### Analysis Info

Analysis Name D:\Data\user data\2015\MAY-2015\09-may-2015\Dr.S.Kumar-AA-151.d  
Method tune\_low.m  
Sample Name AA-151  
Comment

Acquisition Date 5/9/2015 12:33:52 PM

Operator RUCHI

Instrument micrOTOF-Q II 10330

### Acquisition Parameter

|             |            |                       |           |                  |           |
|-------------|------------|-----------------------|-----------|------------------|-----------|
| Source Type | ESI        | Ion Polarity          | Positive  | Set Nebulizer    | 0.4 Bar   |
| Focus       | Not active | Set Capillary         | 4600 V    | Set Dry Heater   | 180 °C    |
| Scan Begin  | 50 m/z     | Set End Plate Offset  | -500 V    | Set Dry Gas      | 4.0 l/min |
| Scan End    | 3000 m/z   | Set Collision Cell RF | 130.0 Vpp | Set Divert Valve | Waste     |

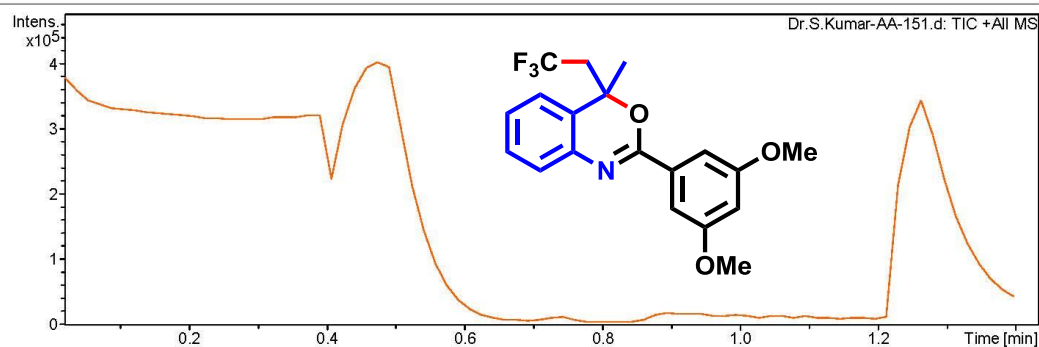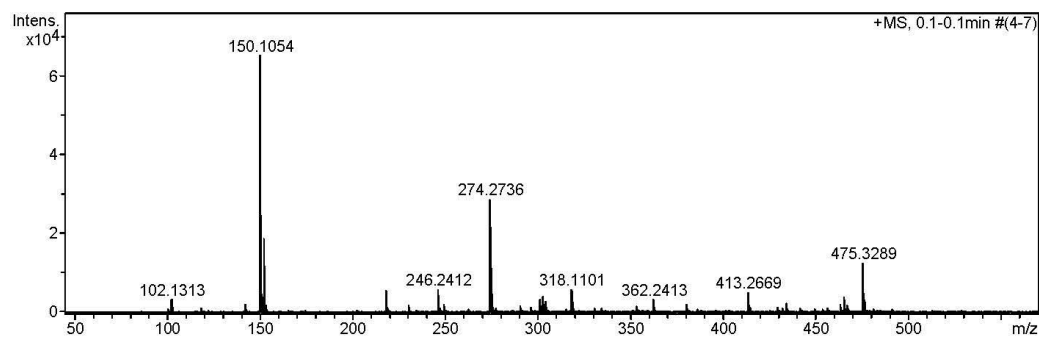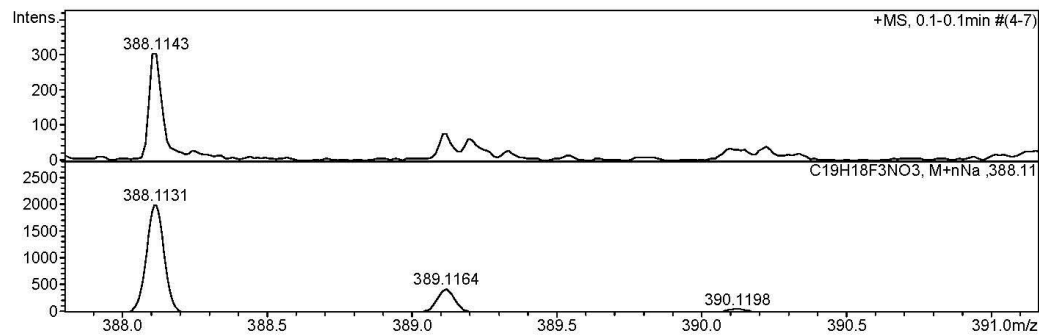

## Display Report

### Analysis Info

|                  |                                                                               |
|------------------|-------------------------------------------------------------------------------|
| Analysis Name    | D:\Data\user data\2015\MAY-2015\15-MAY-2015\Dr.S.Kumar-AA-116_1-A,5_01_2511.d |
| Method           | HRLCMS-20 Sept.m                                                              |
| Sample Name      | Dr.S.Kumar-AA-116                                                             |
| Comment          |                                                                               |
| Acquisition Date | 5/15/2015 11:40:08 AM                                                         |
| Operator         | RUCHI                                                                         |
| Instrument       | microTOF-Q II 10330                                                           |

### Acquisition Parameter

|             |          |                       |           |
|-------------|----------|-----------------------|-----------|
| Source Type | ESI      | Ion Polarity          | Positive  |
| Focus       | Active   | Set Capillary         | 4500 V    |
| Scan Begin  | 50 m/z   | Set End Plate Offset  | -500 V    |
| Scan End    | 3000 m/z | Set Collision Cell RF | 130.0 Vpp |
|             |          | Set Nebulizer         | 1.2 Bar   |
|             |          | Set Dry Heater        | 200 °C    |
|             |          | Set Dry Gas           | 7.0 l/min |
|             |          | Set Divert Valve      | Waste     |

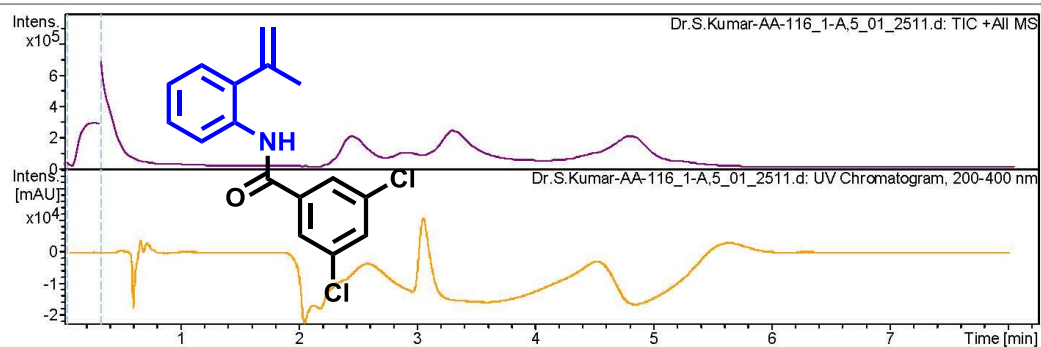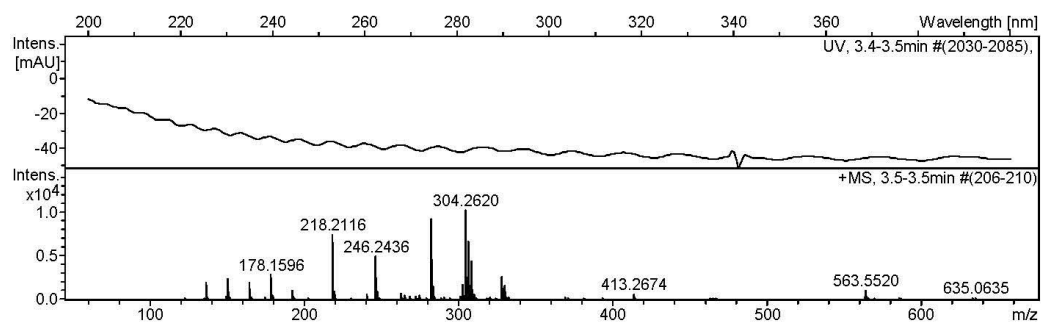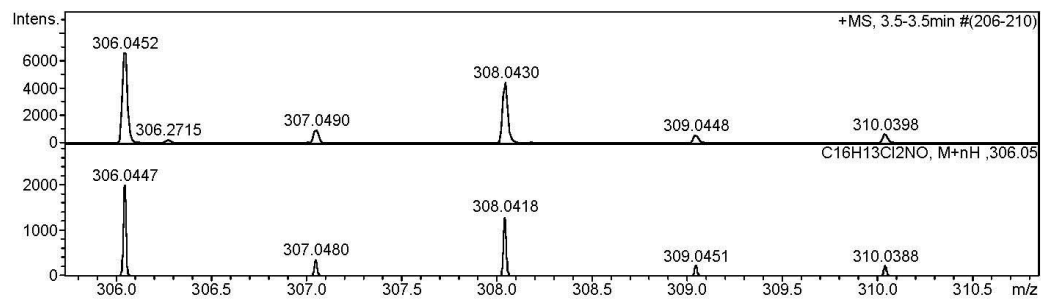

## Display Report

### Analysis Info

Analysis Name D:\Data\user data\2015\MARCH-2015\31-mar-2015\Dr.S.Kumar-AA-129-1.d  
Method tune\_wide.m  
Sample Name AA-129-1  
Comment

Acquisition Date 3/31/2015 12:04:56 PM

Operator RUCHI

Instrument micrOTOF-Q II 10330

### Acquisition Parameter

|             |            |                       |           |                  |           |
|-------------|------------|-----------------------|-----------|------------------|-----------|
| Source Type | ESI        | Ion Polarity          | Positive  | Set Nebulizer    | 0.4 Bar   |
| Focus       | Not active | Set Capillary         | 4500 V    | Set Dry Heater   | 180 °C    |
| Scan Begin  | 50 m/z     | Set End Plate Offset  | -500 V    | Set Dry Gas      | 4.0 l/min |
| Scan End    | 3000 m/z   | Set Collision Cell RF | 600.0 Vpp | Set Divert Valve | Waste     |

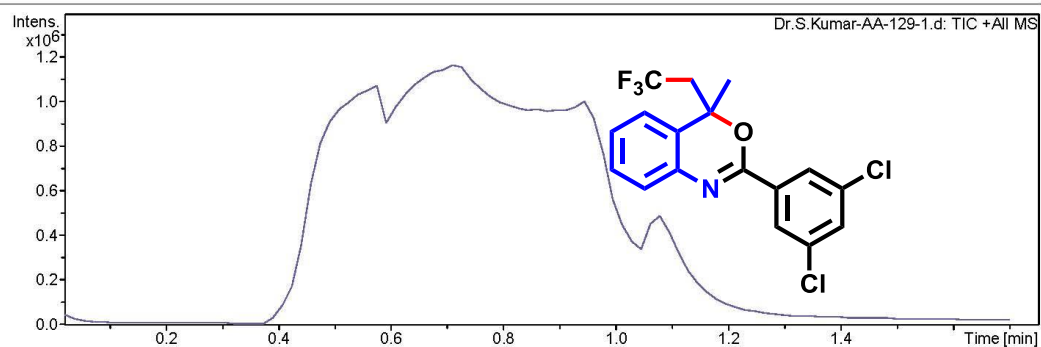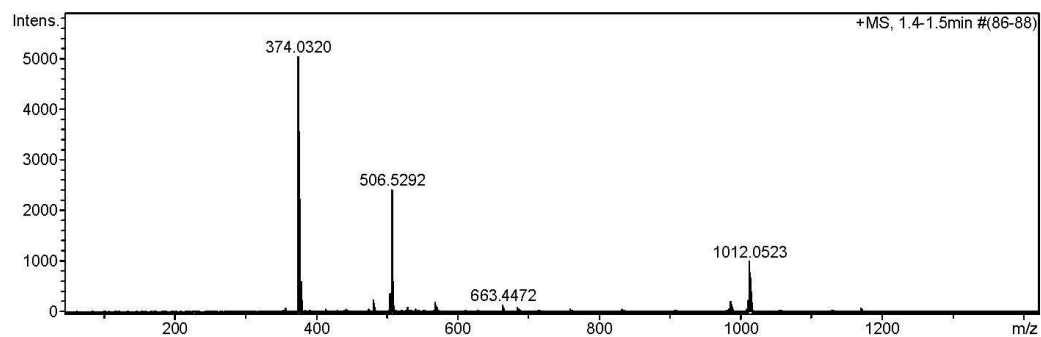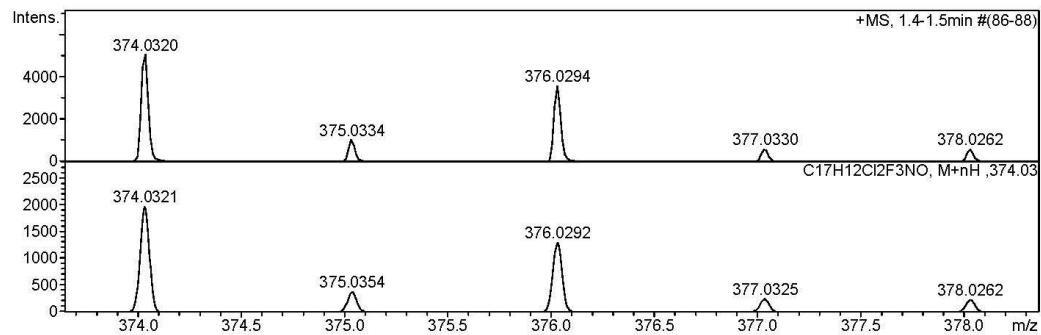

## Display Report

### Analysis Info

Analysis Name D:\Data\user data\2015\MAY-2015\14-MAY-2015\Dr.S.Kumar-AA-80\_1-B,4\_01\_2494.d  
Method HRLCMS-20 Sept.m  
Sample Name Dr.S.Kumar-AA-80  
Comment

Acquisition Date 5/14/2015 12:42:33 PM

Operator RUCHI

Instrument micrOTOF-Q II 10330

### Acquisition Parameter

|             |          |                       |           |                  |           |
|-------------|----------|-----------------------|-----------|------------------|-----------|
| Source Type | ESI      | Ion Polarity          | Positive  | Set Nebulizer    | 1.2 Bar   |
| Focus       | Active   | Set Capillary         | 4500 V    | Set Dry Heater   | 200 °C    |
| Scan Begin  | 50 m/z   | Set End Plate Offset  | -500 V    | Set Dry Gas      | 7.0 l/min |
| Scan End    | 3000 m/z | Set Collision Cell RF | 130.0 Vpp | Set Divert Valve | Waste     |

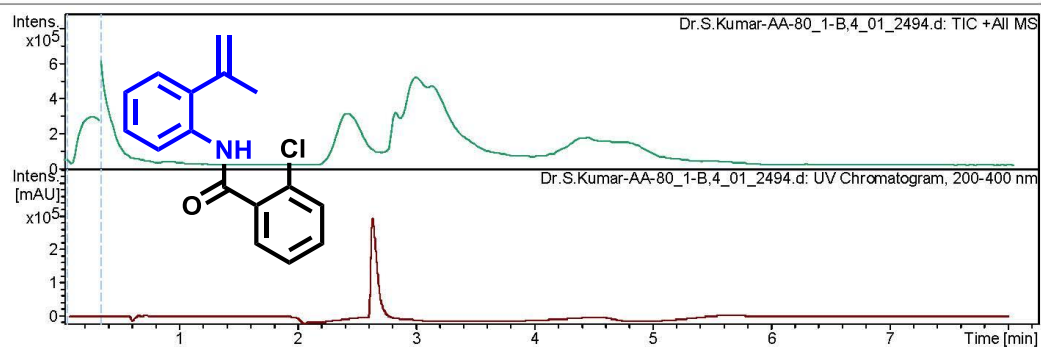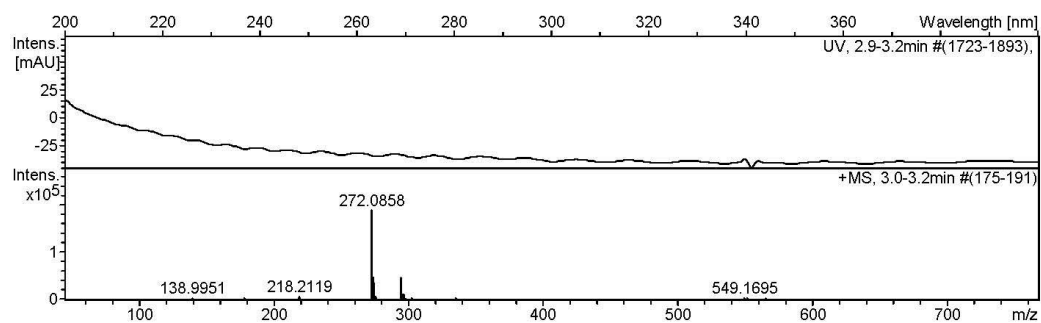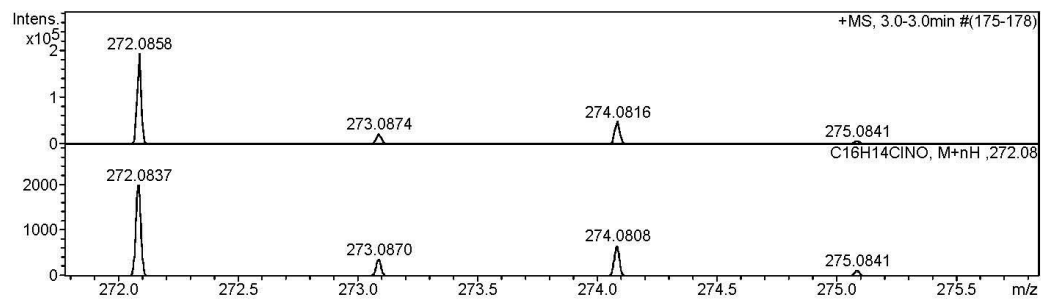

## Display Report

### Analysis Info

Analysis Name D:\Data\user data\2015\April-2015\22-April-2015\Dr.S.Kumar-AA-143.d  
Method tune\_low.m  
Sample Name AA-143  
Comment

Acquisition Date 4/23/2015 4:19:15 PM

Operator RUCHI

Instrument micrOTOF-Q II 10330

### Acquisition Parameter

|             |            |                       |           |                  |           |
|-------------|------------|-----------------------|-----------|------------------|-----------|
| Source Type | ESI        | Ion Polarity          | Positive  | Set Nebulizer    | 0.4 Bar   |
| Focus       | Not active | Set Capillary         | 4600 V    | Set Dry Heater   | 180 °C    |
| Scan Begin  | 50 m/z     | Set End Plate Offset  | -500 V    | Set Dry Gas      | 4.0 l/min |
| Scan End    | 3000 m/z   | Set Collision Cell RF | 330.0 Vpp | Set Divert Valve | Waste     |

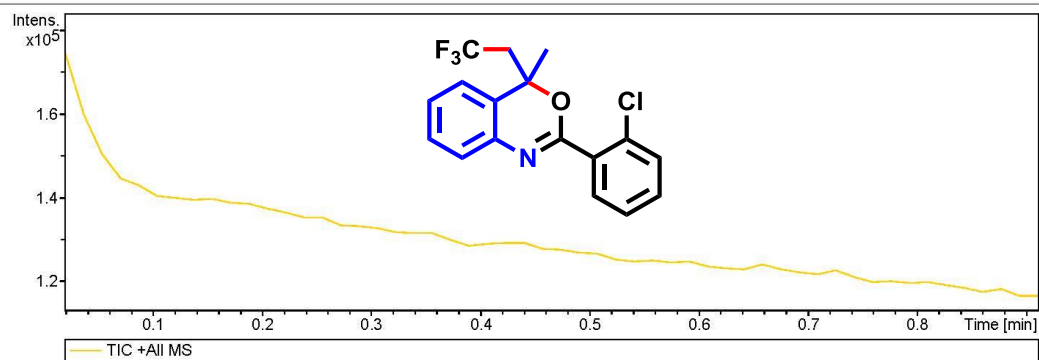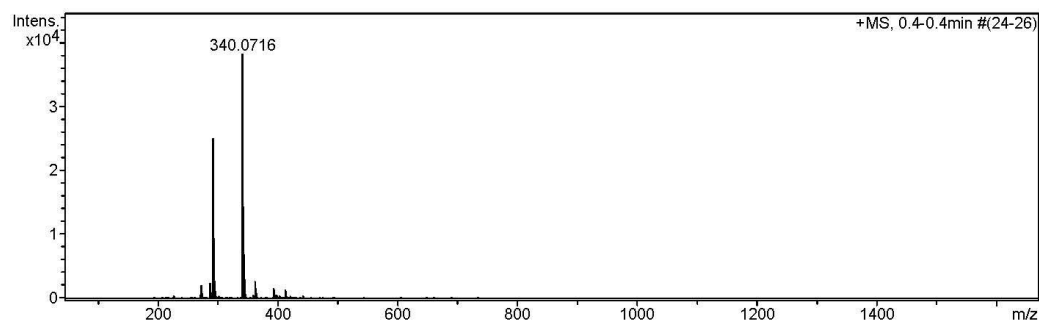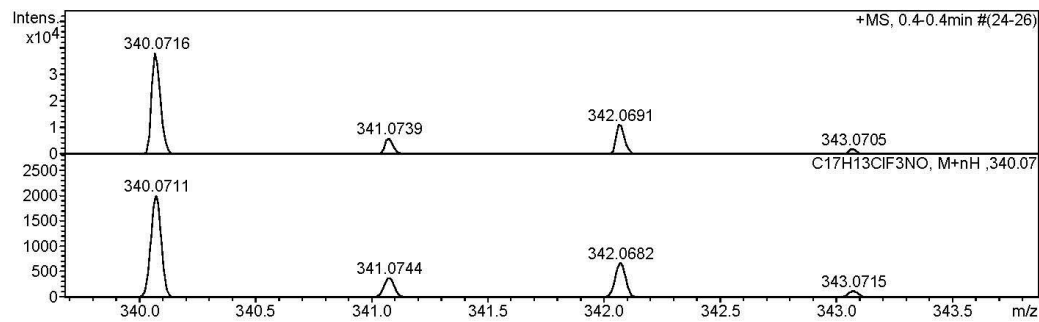

## Display Report

### Analysis Info

Analysis Name D:\Data\user data\2015\MAY-2015\22-MAY-2015\Dr.S.Kumar-AA-66\_1-A\_6\_01\_2585.d  
Method HRLCMS-20 Sept.m  
Sample Name Dr.S.Kumar-AA-66  
Comment

Acquisition Date 5/22/2015 11:01:58 AM

Operator RUCHI

Instrument microTOF-Q II 10330

### Acquisition Parameter

|             |          |                       |           |                  |           |
|-------------|----------|-----------------------|-----------|------------------|-----------|
| Source Type | ESI      | Ion Polarity          | Positive  | Set Nebulizer    | 1.2 Bar   |
| Focus       | Active   | Set Capillary         | 4500 V    | Set Dry Heater   | 200 °C    |
| Scan Begin  | 50 m/z   | Set End Plate Offset  | -500 V    | Set Dry Gas      | 7.0 l/min |
| Scan End    | 3000 m/z | Set Collision Cell RF | 130.0 Vpp | Set Divert Valve | Waste     |

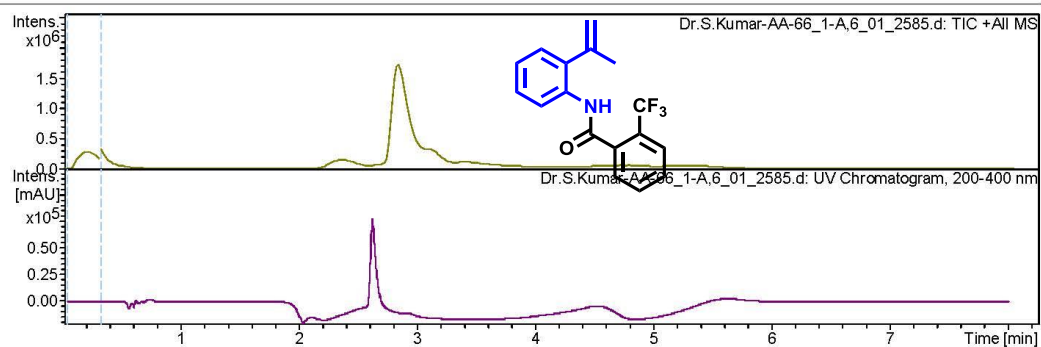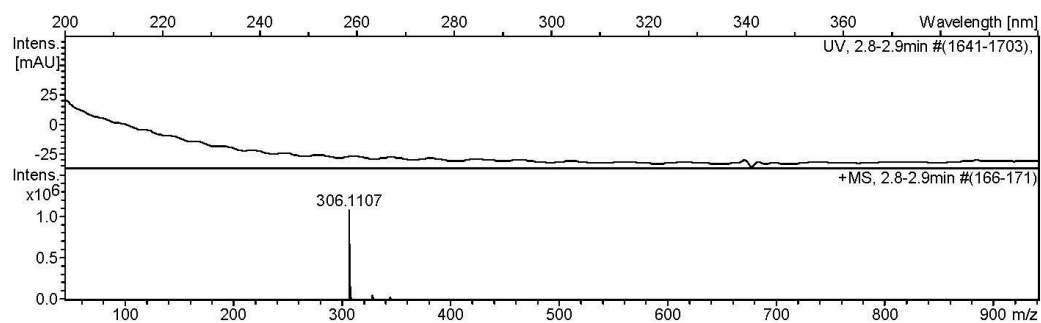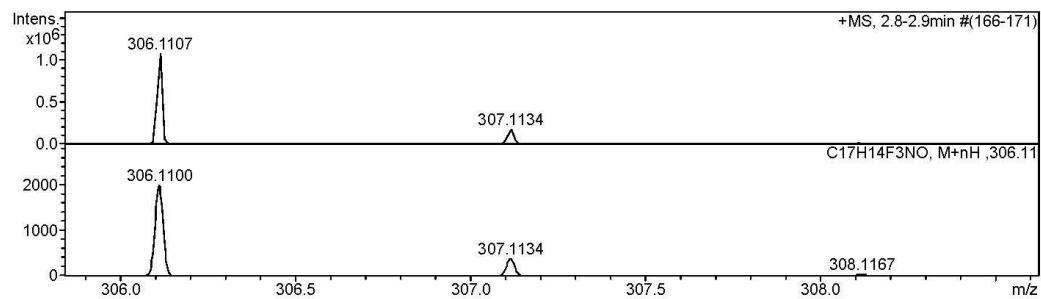

## Display Report

### Analysis Info

Analysis Name D:\Data\user data\2015\MAY-2015\19-MAY-2015\Dr.S.Kumar-AA-158-1.d  
Method tune\_low.m  
Sample Name AA-158-1  
Comment

Acquisition Date 5/19/2015 4:56:49 PM

Operator RUCHI

Instrument microTOF-Q II 10330

### Acquisition Parameter

|             |            |                       |           |                  |           |
|-------------|------------|-----------------------|-----------|------------------|-----------|
| Source Type | ESI        | Ion Polarity          | Positive  | Set Nebulizer    | 0.4 Bar   |
| Focus       | Not active | Set Capillary         | 4600 V    | Set Dry Heater   | 180 °C    |
| Scan Begin  | 50 m/z     | Set End Plate Offset  | -500 V    | Set Dry Gas      | 4.0 l/min |
| Scan End    | 3000 m/z   | Set Collision Cell RF | 130.0 Vpp | Set Divert Valve | Waste     |

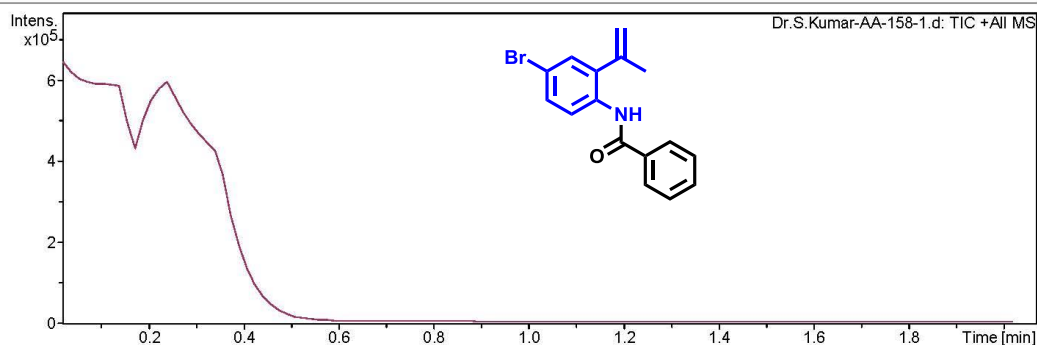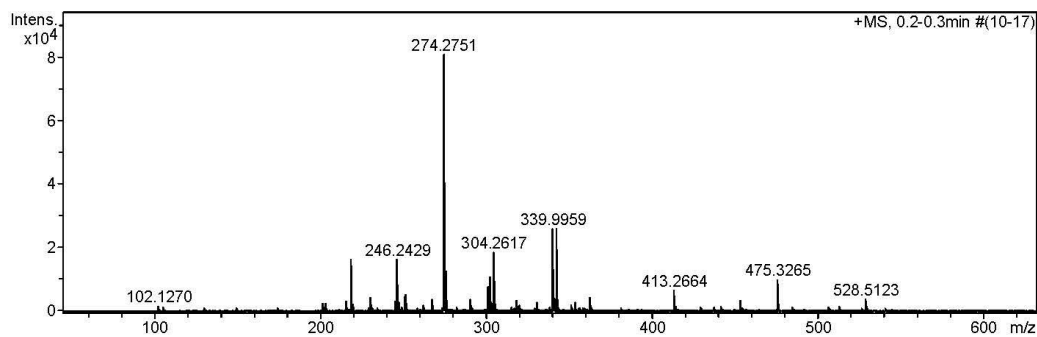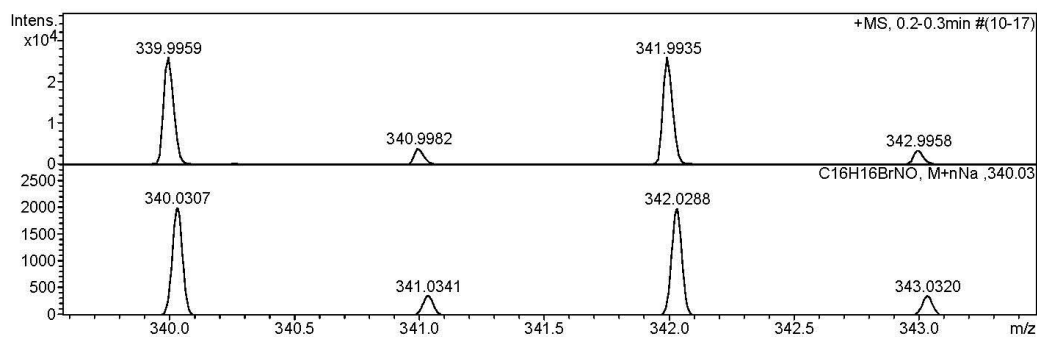

## Display Report

### Analysis Info

|               |                                                                               |
|---------------|-------------------------------------------------------------------------------|
| Analysis Name | D:\Data\user data\2015\MAY-2015\08-MAY-2015\Dr.S.Kapur-AA-162_1-A,7_01_2423.d |
| Method        | HRLCMS-20 Sept.m                                                              |
| Sample Name   | Dr.S.Kapur-AA-162                                                             |
| Comment       |                                                                               |

|                  |                     |
|------------------|---------------------|
| Acquisition Date | 5/8/2015 2:59:14 PM |
| Operator         | RUCHI               |
| Instrument       | microTOF-Q II 10330 |

### Acquisition Parameter

|             |          |                       |           |
|-------------|----------|-----------------------|-----------|
| Source Type | ESI      | Ion Polarity          | Positive  |
| Focus       | Active   | Set Capillary         | 4500 V    |
| Scan Begin  | 50 m/z   | Set End Plate Offset  | -500 V    |
| Scan End    | 3000 m/z | Set Collision Cell RF | 130.0 Vpp |
|             |          | Set Nebulizer         | 1.2 Bar   |
|             |          | Set Dry Heater        | 200 °C    |
|             |          | Set Dry Gas           | 7.0 l/min |
|             |          | Set Divert Valve      | Waste     |

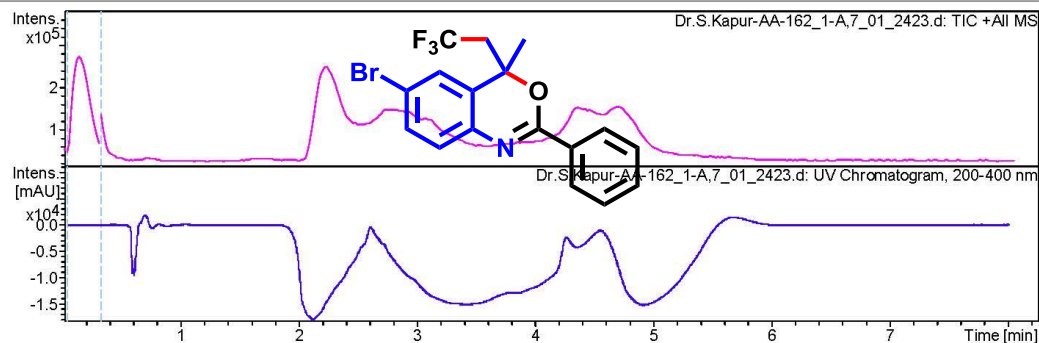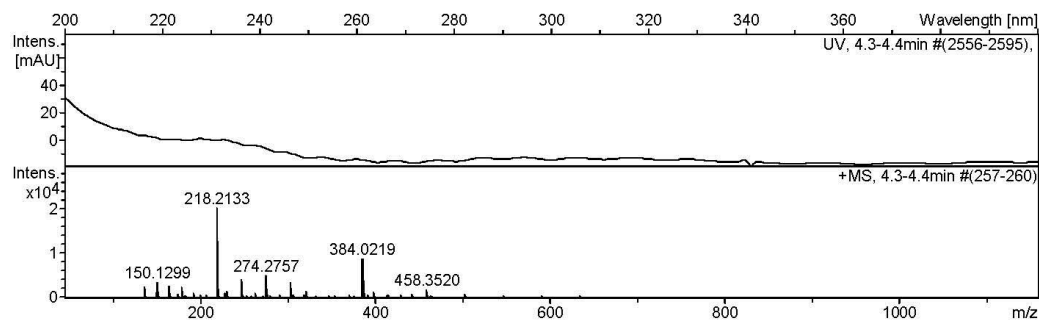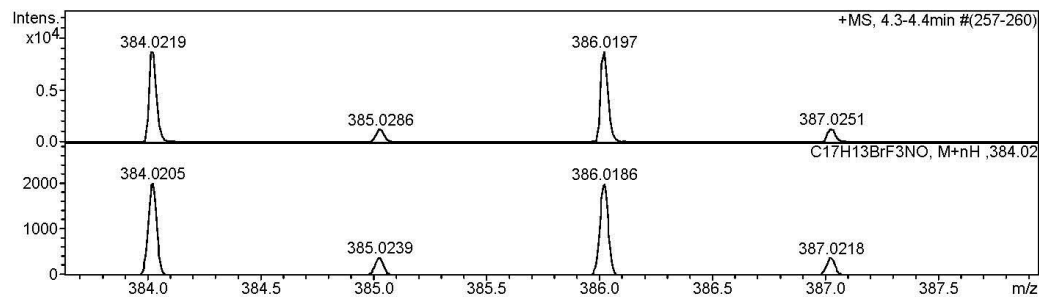



## Display Report

### Analysis Info

Analysis Name D:\Data\user data\2015\MAY-2015\18-MAY-2015\Dr.S.Kumar-AA-157\_1-A,4\_01\_2523.d  
Method HRLCMS-20 Sept.m  
Sample Name Dr.S.Kumar-AA-157  
Comment

Acquisition Date 5/18/2015 11:58:39 AM

Operator RUCHI

Instrument microTOF-Q II 10330

### Acquisition Parameter

|             |          |                       |           |                  |           |
|-------------|----------|-----------------------|-----------|------------------|-----------|
| Source Type | ESI      | Ion Polarity          | Positive  | Set Nebulizer    | 1.2 Bar   |
| Focus       | Active   | Set Capillary         | 4500 V    | Set Dry Heater   | 200 °C    |
| Scan Begin  | 50 m/z   | Set End Plate Offset  | -500 V    | Set Dry Gas      | 7.0 l/min |
| Scan End    | 3000 m/z | Set Collision Cell RF | 130.0 Vpp | Set Divert Valve | Waste     |

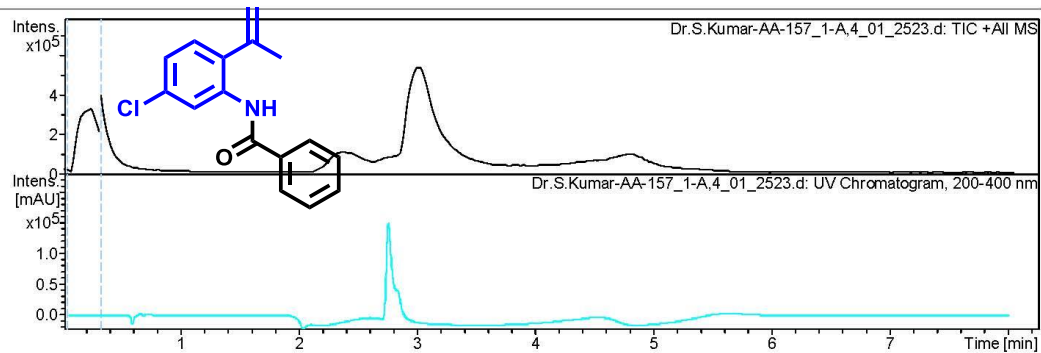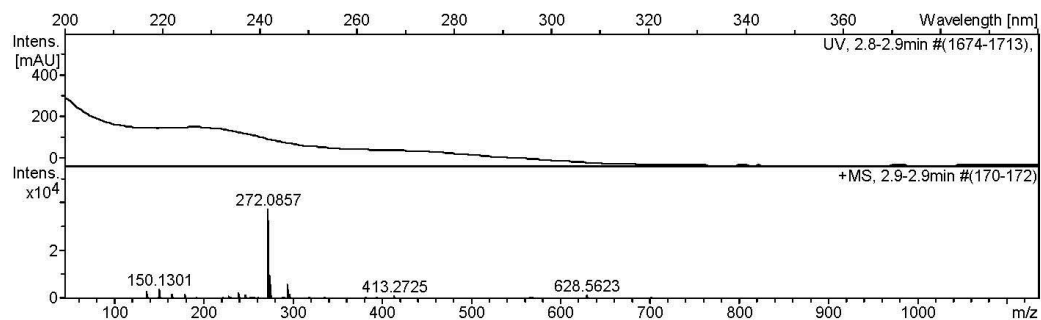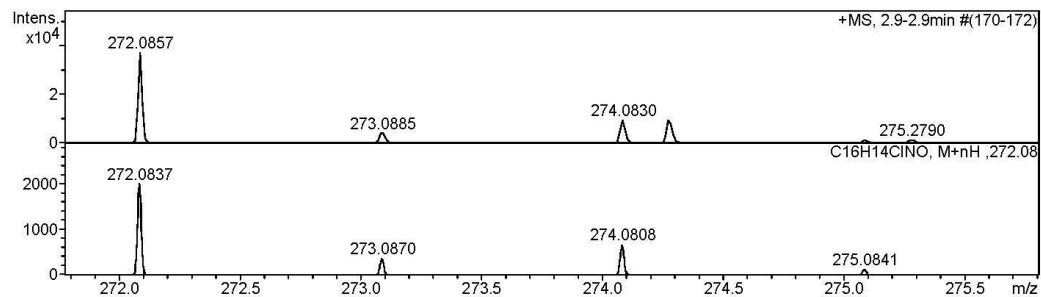

## Display Report

### Analysis Info

|               |                                                                               |
|---------------|-------------------------------------------------------------------------------|
| Analysis Name | D:\Data\user data\2015\MAY-2015\07-MAY-2015\Dr.S.Kumar-AA-163_1-C,2_01_2410.d |
| Method        | HRLCMS-20 Sept.m                                                              |
| Sample Name   | Dr.S.Kumar-AA-163                                                             |
| Comment       |                                                                               |

|                  |                     |
|------------------|---------------------|
| Acquisition Date | 5/7/2015 2:53:26 PM |
| Operator         | RUCHI               |
| Instrument       | microTOF-Q II 10330 |

### Acquisition Parameter

|             |          |                       |           |
|-------------|----------|-----------------------|-----------|
| Source Type | ESI      | Ion Polarity          | Positive  |
| Focus       | Active   | Set Capillary         | 4500 V    |
| Scan Begin  | 50 m/z   | Set End Plate Offset  | -500 V    |
| Scan End    | 3000 m/z | Set Collision Cell RF | 130.0 Vpp |

|                  |           |
|------------------|-----------|
| Set Nebulizer    | 1.2 Bar   |
| Set Dry Heater   | 200 °C    |
| Set Dry Gas      | 7.0 l/min |
| Set Divert Valve | Waste     |

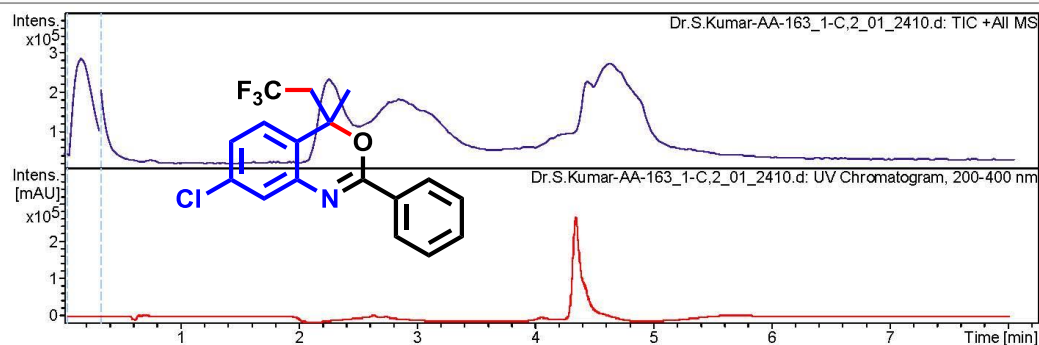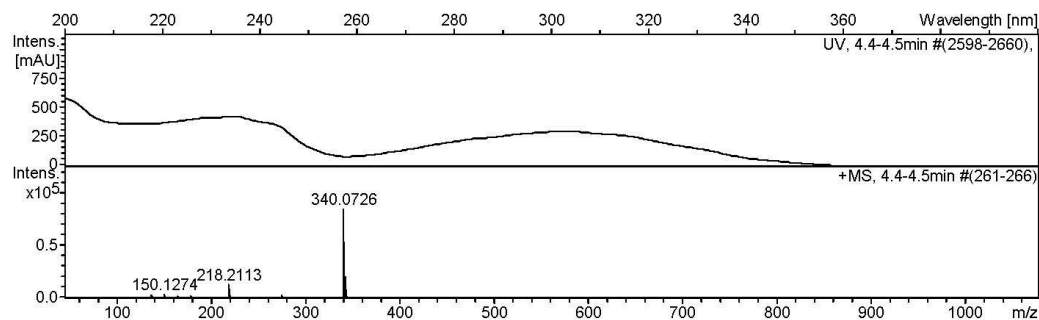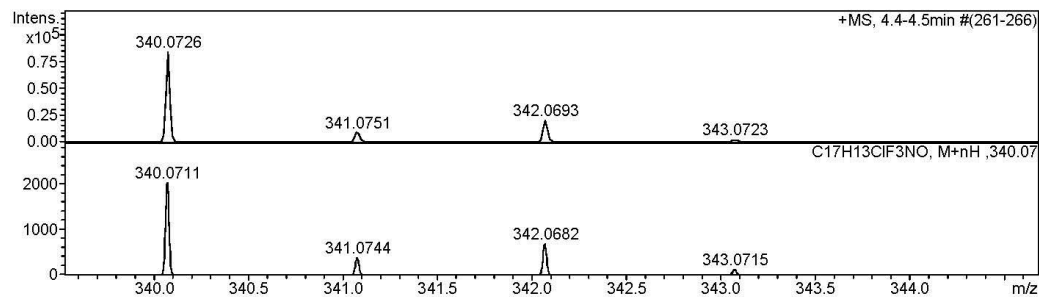

## Display Report

### Analysis Info

|               |                                                                                    |
|---------------|------------------------------------------------------------------------------------|
| Analysis Name | D:\Data\user data\2015\MARCH-2015\30-MAR-2015\Dr.S.Kumar-SJ-AA-127_1-B,2_01_2033.d |
| Method        | HRLCMS-20 Sept.m                                                                   |
| Sample Name   | Dr.S.Kumar-SJ-AA-127                                                               |
| Comment       |                                                                                    |

Acquisition Date 3/30/2015 2:38:16 PM

Operator RUCHI

Instrument micrOTOF-Q II 10330

### Acquisition Parameter

|             |          |                       |           |
|-------------|----------|-----------------------|-----------|
| Source Type | ESI      | Ion Polarity          | Positive  |
| Focus       | Active   | Set Nebulizer         | 1.2 Bar   |
| Scan Begin  | 50 m/z   | Set Dry Heater        | 200 °C    |
| Scan End    | 3000 m/z | Set Dry Gas           | 7.0 l/min |
|             |          | Set End Plate Offset  | -500 V    |
|             |          | Set Collision Cell RF | 130.0 Vpp |
|             |          | Set Divert Valve      | Waste     |

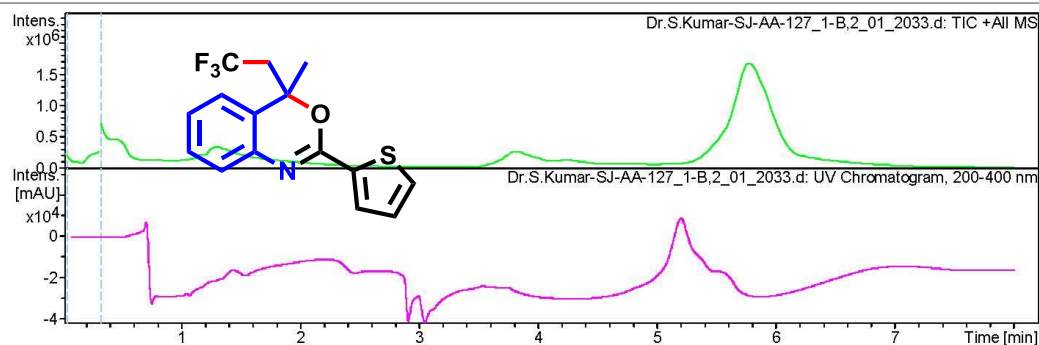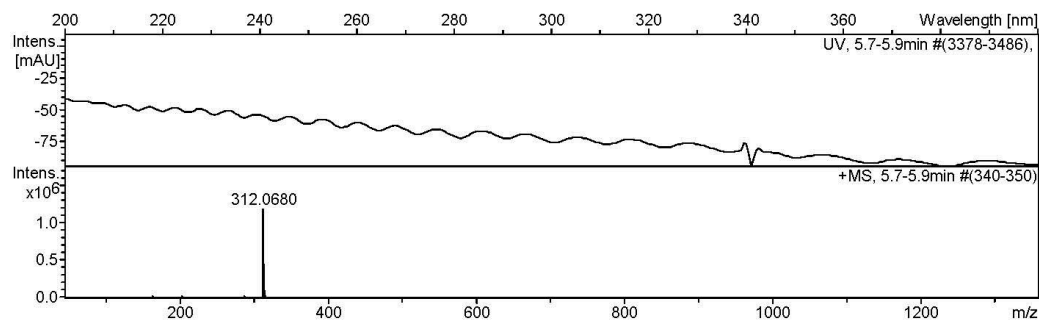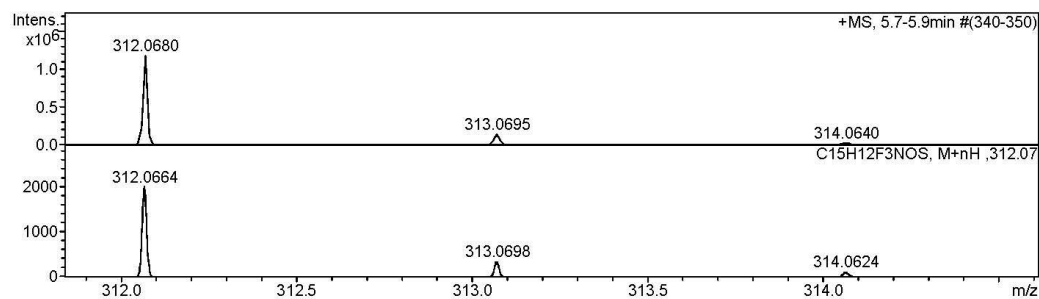

## Display Report

### Analysis Info

|               |                                                                               |
|---------------|-------------------------------------------------------------------------------|
| Analysis Name | D:\Data\user data\2015\MAY-2015\18-MAY-2015\Dr.S.Kumar-SJ-310_1-A,2_01_2521.d |
| Method        | HRLCMS-20 Sept.m                                                              |
| Sample Name   | Dr.S.Kumar-SJ-310                                                             |
| Comment       |                                                                               |

Acquisition Date 5/18/2015 11:41:16 AM

Operator RUCHI

Instrument microTOF-Q II 10330

### Acquisition Parameter

|             |          |                       |           |
|-------------|----------|-----------------------|-----------|
| Source Type | ESI      | Ion Polarity          | Positive  |
| Focus       | Active   | Set Capillary         | 4500 V    |
| Scan Begin  | 50 m/z   | Set End Plate Offset  | -500 V    |
| Scan End    | 3000 m/z | Set Collision Cell RF | 130.0 Vpp |
|             |          | Set Nebulizer         | 1.2 Bar   |
|             |          | Set Dry Heater        | 200 °C    |
|             |          | Set Dry Gas           | 7.0 l/min |
|             |          | Set Divert Valve      | Waste     |

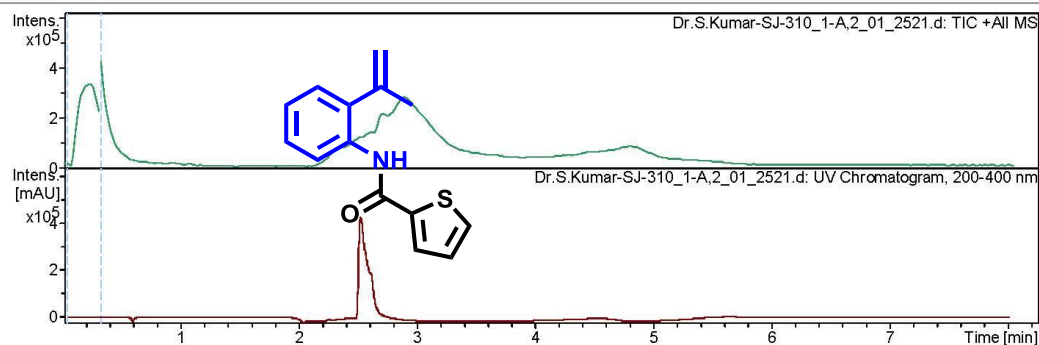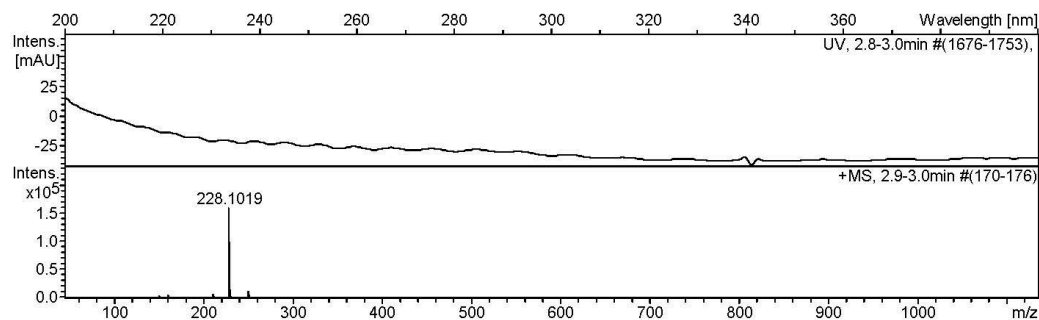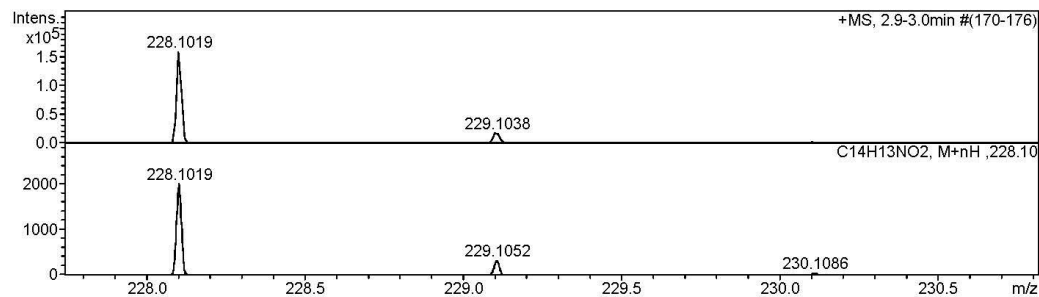

## Display Report

### Analysis Info

Analysis Name D:\Data\user data\2015\MAY-2015\07-MAY-2015\Dr.S.Kumar-AA-139\_1-C,1\_01\_2409.d  
Method HRLCMS-20 Sept.m  
Sample Name Dr.S.Kumar-AA-139  
Comment

Acquisition Date 5/7/2015 2:44:18 PM  
Operator RUCHI  
Instrument microTOF-Q II 10330

### Acquisition Parameter

|             |          |                       |           |                  |           |
|-------------|----------|-----------------------|-----------|------------------|-----------|
| Source Type | ESI      | Ion Polarity          | Positive  | Set Nebulizer    | 1.2 Bar   |
| Focus       | Active   | Set Capillary         | 4500 V    | Set Dry Heater   | 200 °C    |
| Scan Begin  | 50 m/z   | Set End Plate Offset  | -500 V    | Set Dry Gas      | 7.0 l/min |
| Scan End    | 3000 m/z | Set Collision Cell RF | 130.0 Vpp | Set Divert Valve | Waste     |

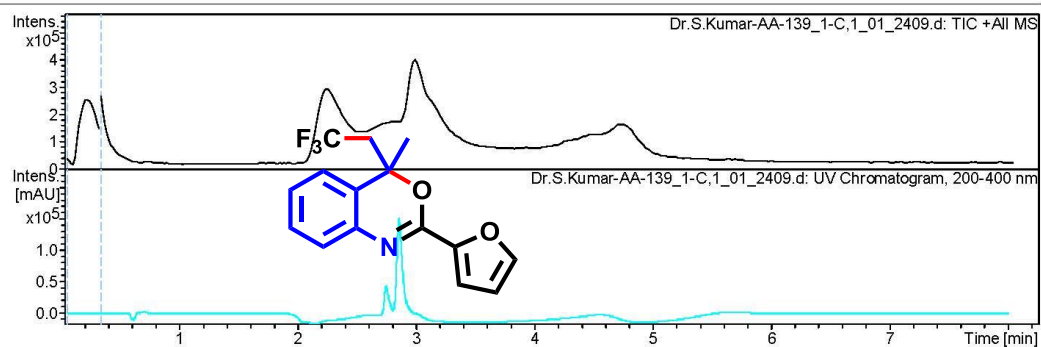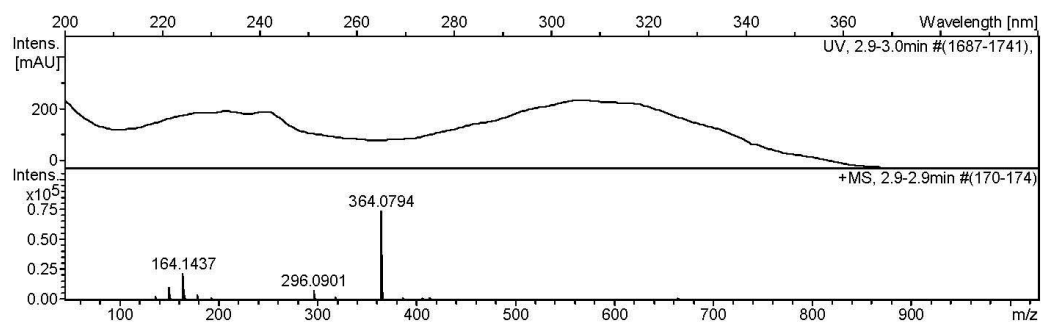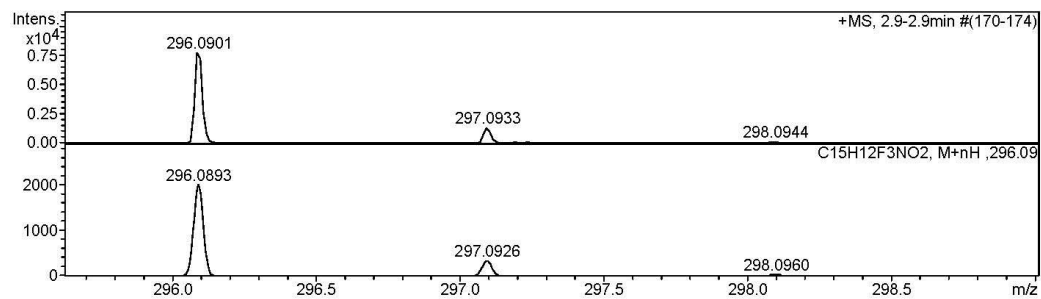

## Display Report

### Analysis Info

|               |                                                                               |
|---------------|-------------------------------------------------------------------------------|
| Analysis Name | D:\Data\user data\2015\MAY-2015\18-MAY-2015\Dr.S.Kumar-AA-148_1-A,3_01_2522.d |
| Method        | HRLCMS-20 Sept.m                                                              |
| Sample Name   | Dr.S.Kumar-AA-148                                                             |
| Comment       |                                                                               |

Acquisition Date 5/18/2015 11:50:25 AM

Operator RUCHI

Instrument microTOF-Q II 10330

### Acquisition Parameter

|             |          |                       |           |
|-------------|----------|-----------------------|-----------|
| Source Type | ESI      | Ion Polarity          | Positive  |
| Focus       | Active   | Set Capillary         | 4500 V    |
| Scan Begin  | 50 m/z   | Set End Plate Offset  | -500 V    |
| Scan End    | 3000 m/z | Set Collision Cell RF | 130.0 Vpp |

Set Nebulizer 1.2 Bar

Set Dry Heater 200 °C

Set Dry Gas 7.0 l/min

Set Divert Valve Waste

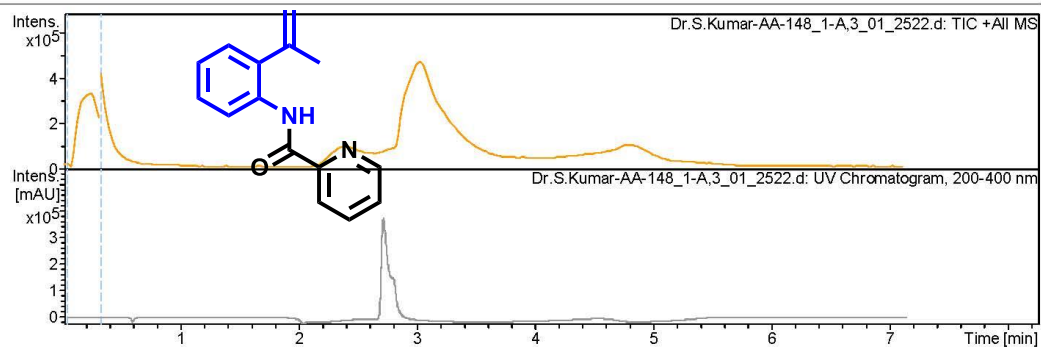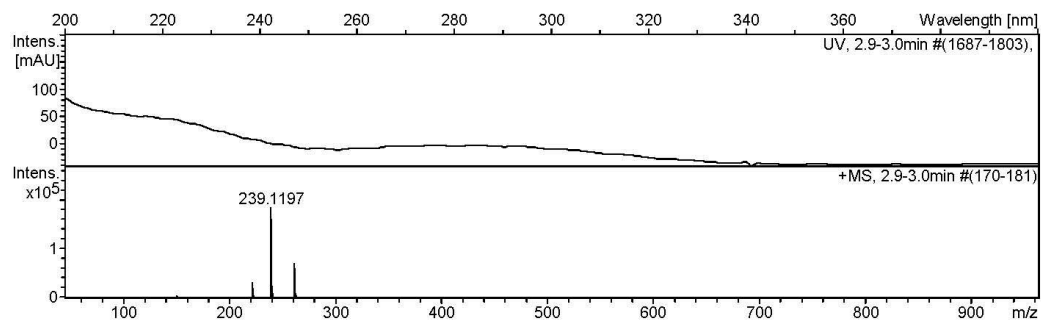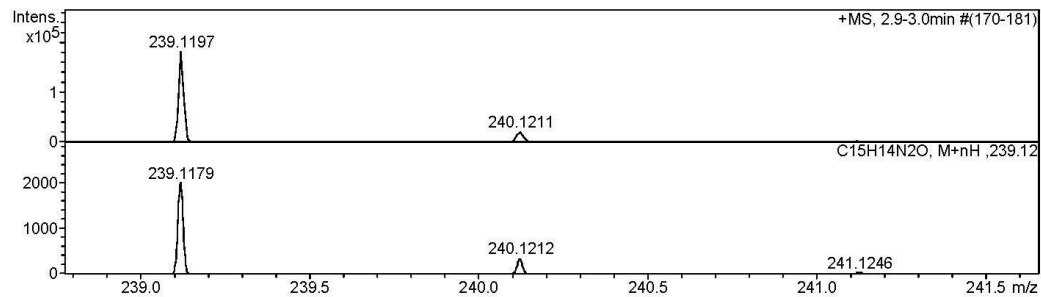

## Display Report

### Analysis Info

|                  |                                                                               |
|------------------|-------------------------------------------------------------------------------|
| Analysis Name    | D:\Data\user data\2015\MAY-2015\07-MAY-2015\Dr.S.Kumar-AA-159_1-C,3_01_2411.d |
| Method           | HRLCMS-20 Sept.m                                                              |
| Sample Name      | Dr.S.Kumar-AA-159                                                             |
| Comment          |                                                                               |
| Acquisition Date | 5/7/2015 3:02:36 PM                                                           |
| Operator         | RUCHI                                                                         |
| Instrument       | microTOF-Q II 10330                                                           |

### Acquisition Parameter

|             |          |                       |           |
|-------------|----------|-----------------------|-----------|
| Source Type | ESI      | Ion Polarity          | Positive  |
| Focus       | Active   | Set Capillary         | 4500 V    |
| Scan Begin  | 50 m/z   | Set End Plate Offset  | -500 V    |
| Scan End    | 3000 m/z | Set Collision Cell RF | 130.0 Vpp |
|             |          | Set Nebulizer         | 1.2 Bar   |
|             |          | Set Dry Heater        | 200 °C    |
|             |          | Set Dry Gas           | 7.0 l/min |
|             |          | Set Divert Valve      | Waste     |

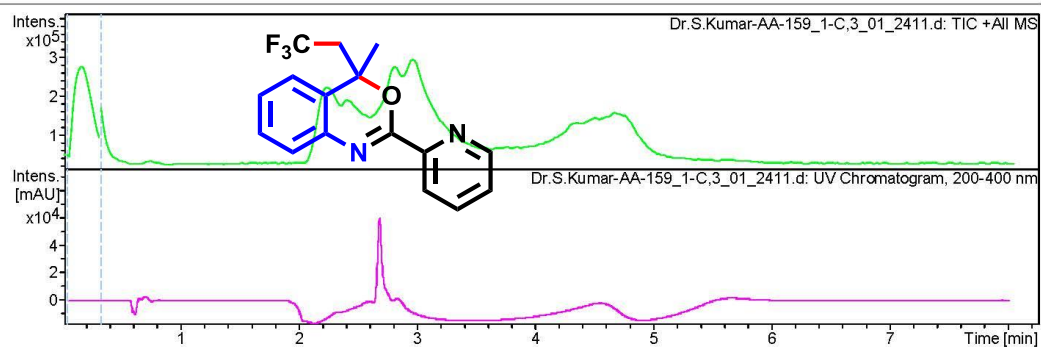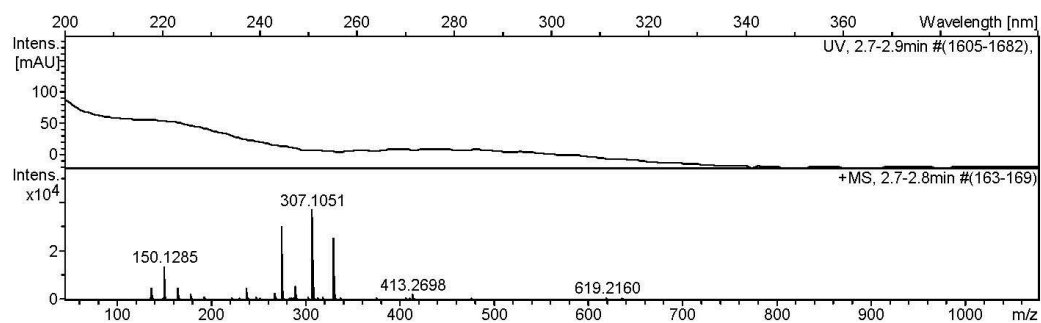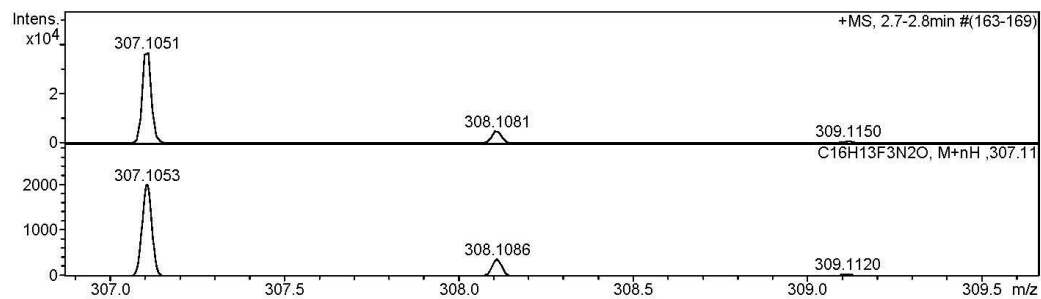

## Display Report

### Analysis Info

|                  |                                                                               |
|------------------|-------------------------------------------------------------------------------|
| Analysis Name    | D:\Data\user data\2015\MAY-2015\15-MAY-2015\Dr.S.Kumar-AA-102_1-A,3_01_2509.d |
| Method           | HRLCMS-20 Sept.m                                                              |
| Sample Name      | Dr.S.Kumar-AA-102                                                             |
| Comment          |                                                                               |
| Acquisition Date | 5/15/2015 11:21:50 AM                                                         |
| Operator         | RUCHI                                                                         |
| Instrument       | microTOF-Q II 10330                                                           |

### Acquisition Parameter

|             |          |                       |           |
|-------------|----------|-----------------------|-----------|
| Source Type | ESI      | Ion Polarity          | Positive  |
| Focus       | Active   | Set Capillary         | 4500 V    |
| Scan Begin  | 50 m/z   | Set End Plate Offset  | -500 V    |
| Scan End    | 3000 m/z | Set Collision Cell RF | 130.0 Vpp |
|             |          | Set Nebulizer         | 1.2 Bar   |
|             |          | Set Dry Heater        | 200 °C    |
|             |          | Set Dry Gas           | 7.0 l/min |
|             |          | Set Divert Valve      | Waste     |

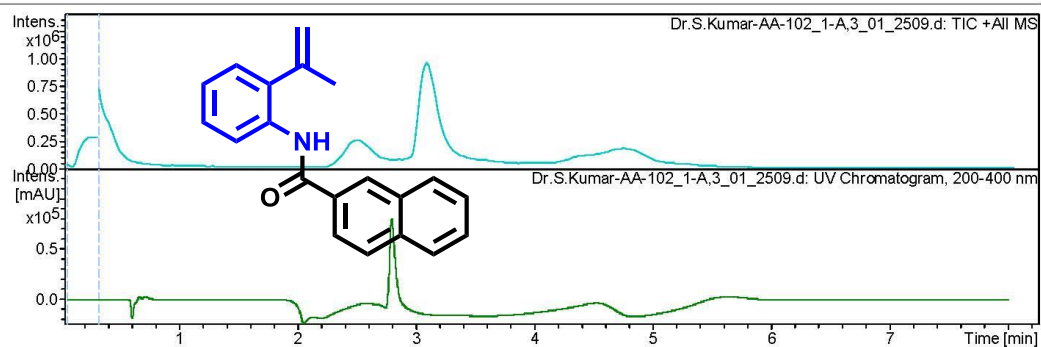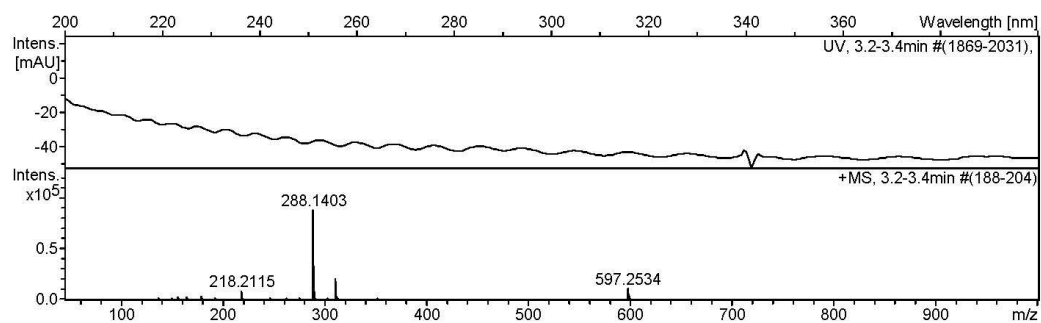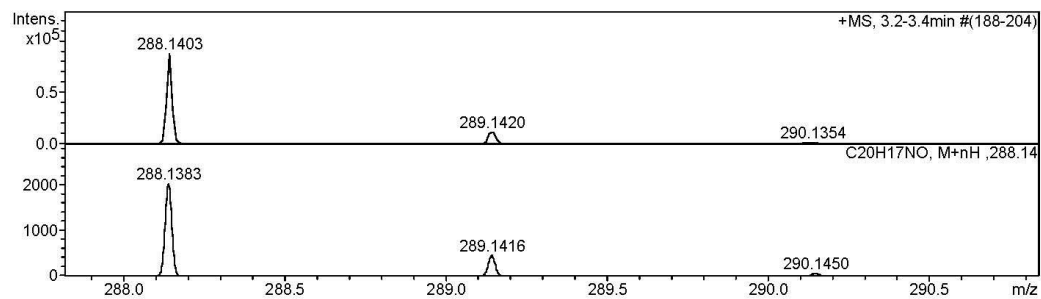



## Display Report

### Analysis Info

|               |                                                                     |                  |                      |
|---------------|---------------------------------------------------------------------|------------------|----------------------|
| Analysis Name | D:\Data\user data\2015\April-2015\24-April-2015\Dr.S.Kumar-AA-140.d | Acquisition Date | 4/24/2015 5:00:05 PM |
| Method        | tune_low.m                                                          | Operator         | RUCHI                |
| Sample Name   | AA-140                                                              | Instrument       | micrOTOF-Q II 10330  |
| Comment       |                                                                     |                  |                      |

### Acquisition Parameter

|             |            |                       |           |                  |           |
|-------------|------------|-----------------------|-----------|------------------|-----------|
| Source Type | ESI        | Ion Polarity          | Positive  | Set Nebulizer    | 0.4 Bar   |
| Focus       | Not active | Set Capillary         | 4600 V    | Set Dry Heater   | 180 °C    |
| Scan Begin  | 50 m/z     | Set End Plate Offset  | -500 V    | Set Dry Gas      | 4.0 l/min |
| Scan End    | 3000 m/z   | Set Collision Cell RF | 130.0 Vpp | Set Divert Valve | Waste     |

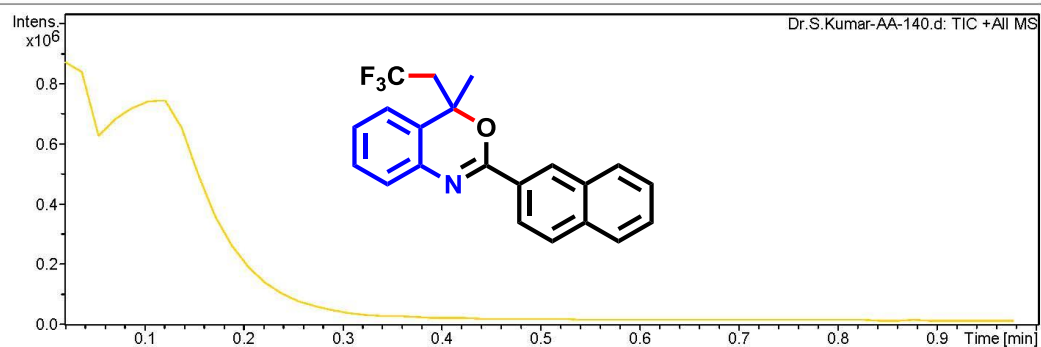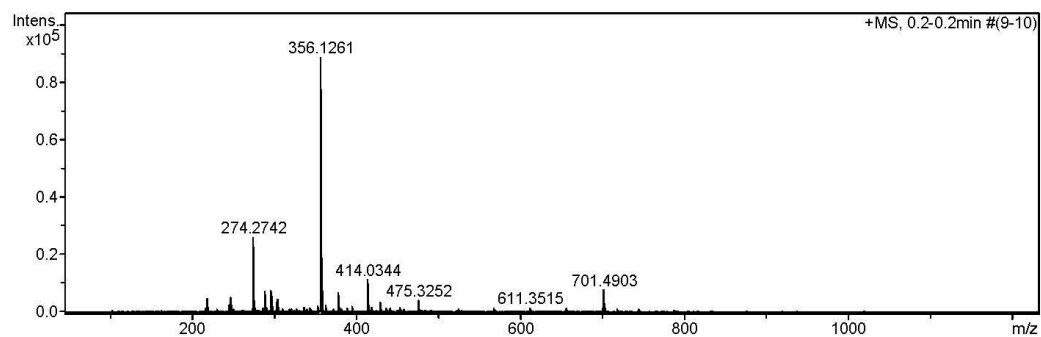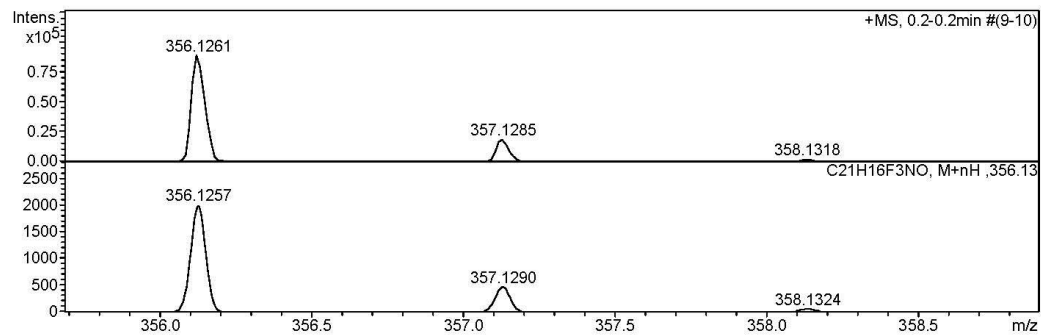

## Display Report

### Analysis Info

Analysis Name D:\Data\user data\2015\MAY-2015\15-MAY-2015\Dr.S.Kumar-AA-97\_1-A,2\_01\_2508.d  
Method HRLCMS-20 Sept.m  
Sample Name Dr.S.Kumar-AA-97  
Comment

Acquisition Date 5/15/2015 11:12:41 AM

Operator RUCHI

Instrument microTOF-Q II 10330

### Acquisition Parameter

|             |          |                       |           |                  |           |
|-------------|----------|-----------------------|-----------|------------------|-----------|
| Source Type | ESI      | Ion Polarity          | Positive  | Set Nebulizer    | 1.2 Bar   |
| Focus       | Active   | Set Capillary         | 4500 V    | Set Dry Heater   | 200 °C    |
| Scan Begin  | 50 m/z   | Set End Plate Offset  | -500 V    | Set Dry Gas      | 7.0 l/min |
| Scan End    | 3000 m/z | Set Collision Cell RF | 130.0 Vpp | Set Divert Valve | Waste     |

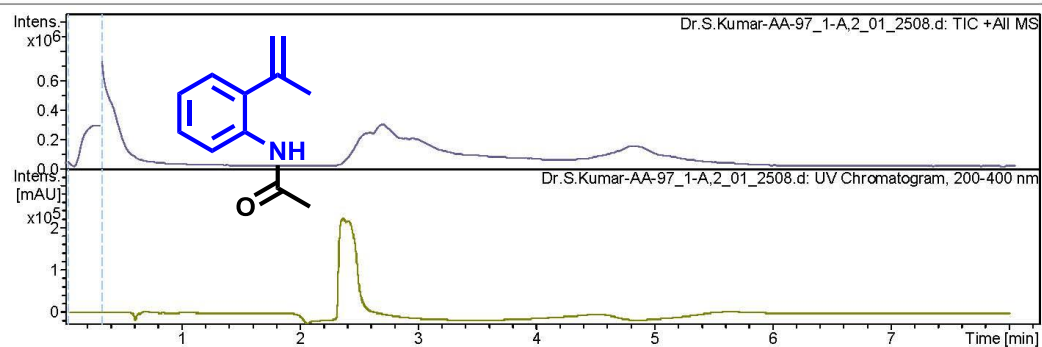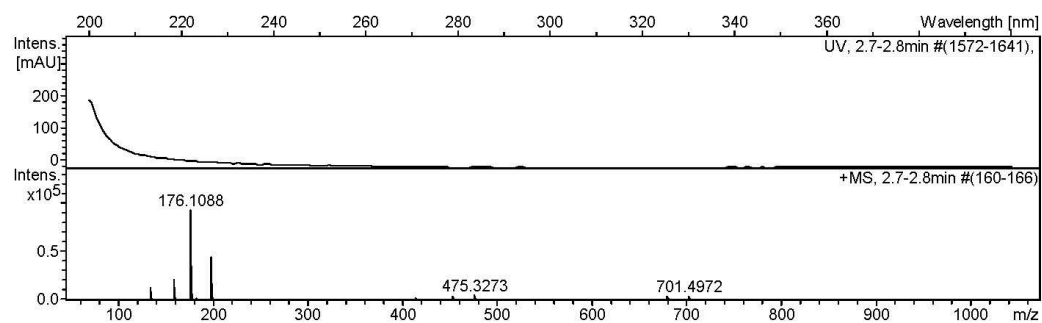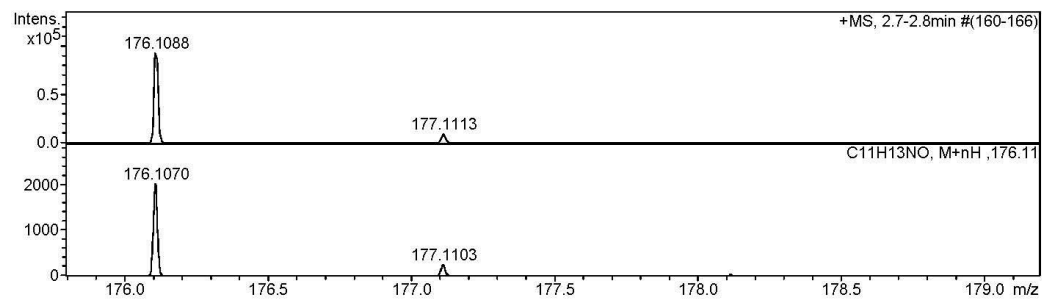

## Display Report

### Analysis Info

Analysis Name D:\Data\user data\2015\April-2015\22-April-2015\Dr.S.Kumar-AA-144.d  
Method tune\_low.m  
Sample Name AA-144  
Comment

Acquisition Date 4/23/2015 4:21:58 PM

Operator RUCHI

Instrument micrOTOF-Q II 10330

### Acquisition Parameter

|             |            |                       |           |                  |           |
|-------------|------------|-----------------------|-----------|------------------|-----------|
| Source Type | ESI        | Ion Polarity          | Positive  | Set Nebulizer    | 0.4 Bar   |
| Focus       | Not active | Set Capillary         | 4600 V    | Set Dry Heater   | 180 °C    |
| Scan Begin  | 50 m/z     | Set End Plate Offset  | -500 V    | Set Dry Gas      | 4.0 l/min |
| Scan End    | 3000 m/z   | Set Collision Cell RF | 330.0 Vpp | Set Divert Valve | Waste     |

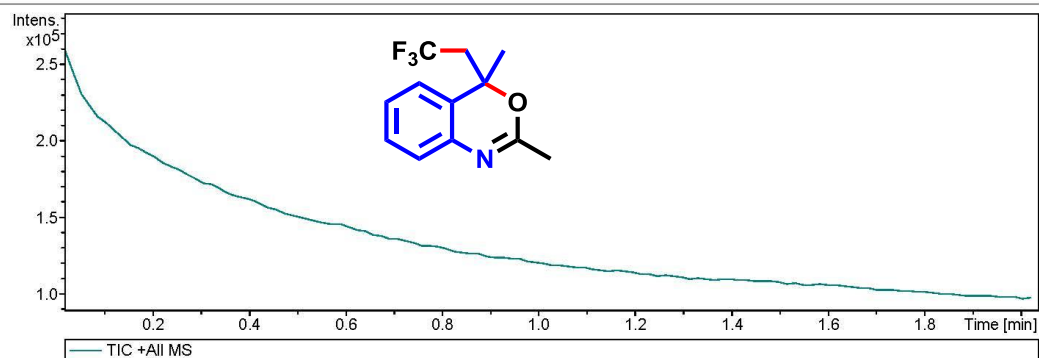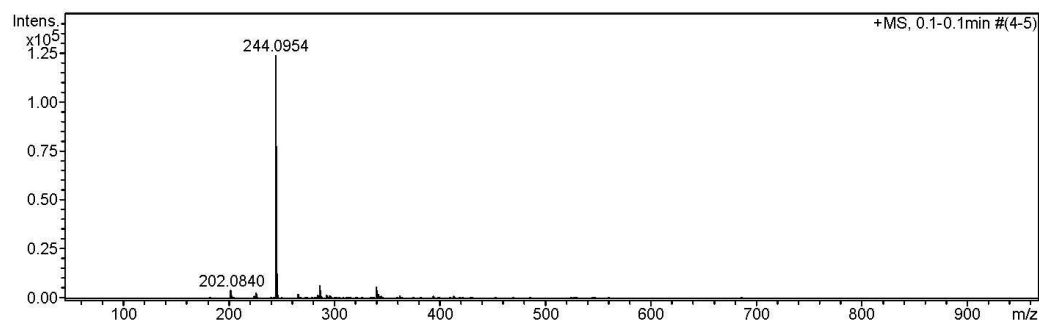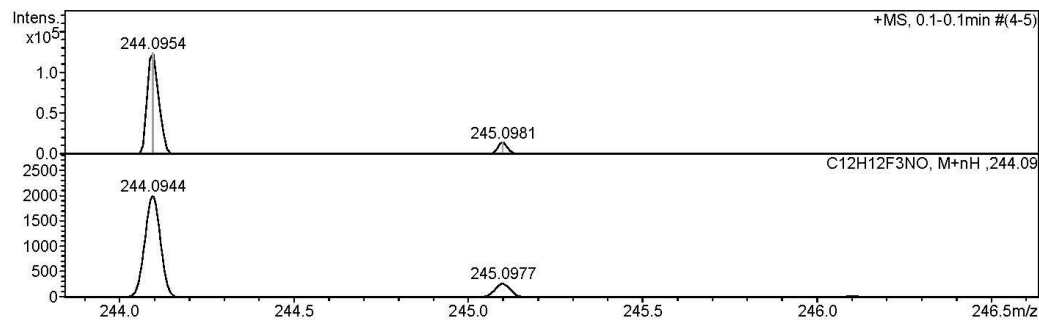

## Display Report

### Analysis Info

Analysis Name D:\Data\user data\2015\April-2015\22-April-2015\Dr.S.Kumar-AA-141-1.d  
Method tune\_low.m  
Sample Name AA-141-1  
Comment

Acquisition Date 4/23/2015 4:10:21 PM

Operator RUCHI

Instrument micrOTOF-Q II 10330

### Acquisition Parameter

|             |            |                       |           |                  |           |
|-------------|------------|-----------------------|-----------|------------------|-----------|
| Source Type | ESI        | Ion Polarity          | Positive  | Set Nebulizer    | 0.4 Bar   |
| Focus       | Not active | Set Capillary         | 4600 V    | Set Dry Heater   | 180 °C    |
| Scan Begin  | 50 m/z     | Set End Plate Offset  | -500 V    | Set Dry Gas      | 4.0 l/min |
| Scan End    | 3000 m/z   | Set Collision Cell RF | 130.0 Vpp | Set Divert Valve | Waste     |

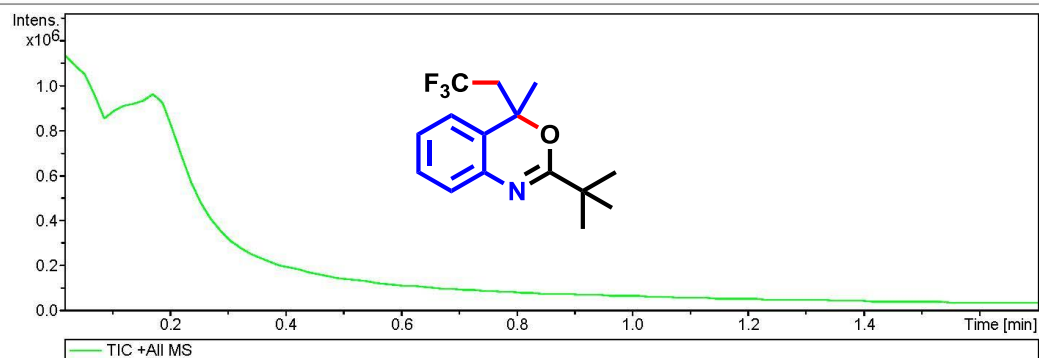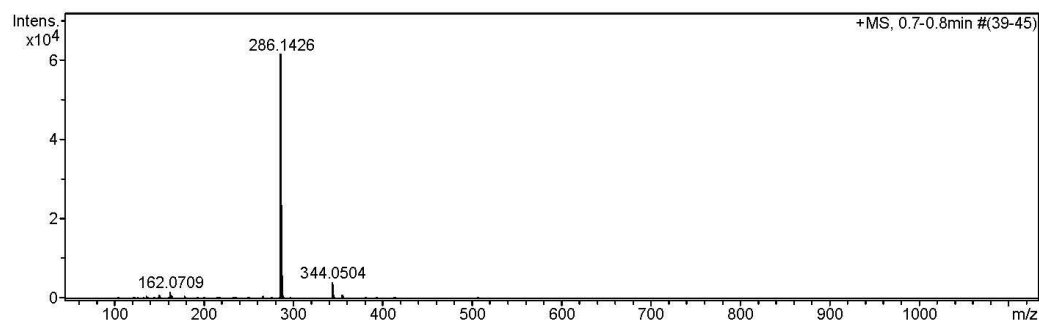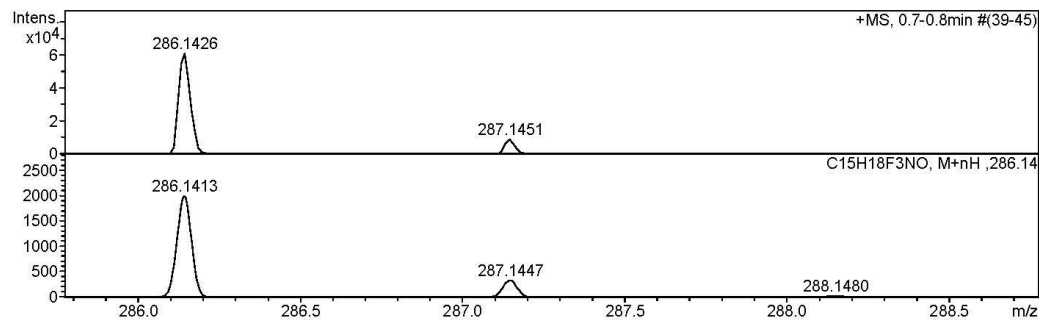

## Display Report

### Analysis Info

Analysis Name D:\Data\user data\2015\MAY-2015\14-MAY-2015\Dr.S.Kumar-SJ-259\_1-B\_6\_01\_2497.d  
Method HRLCMS-20 Sept.m  
Sample Name Dr.S.Kumar-SJ-259  
Comment

Acquisition Date 5/14/2015 1:32:07 PM

Operator RUCHI

Instrument microTOF-Q II 10330

### Acquisition Parameter

|             |          |                       |           |                  |           |
|-------------|----------|-----------------------|-----------|------------------|-----------|
| Source Type | ESI      | Ion Polarity          | Positive  | Set Nebulizer    | 1.2 Bar   |
| Focus       | Active   | Set Capillary         | 4500 V    | Set Dry Heater   | 200 °C    |
| Scan Begin  | 50 m/z   | Set End Plate Offset  | -500 V    | Set Dry Gas      | 7.0 l/min |
| Scan End    | 3000 m/z | Set Collision Cell RF | 130.0 Vpp | Set Divert Valve | Waste     |

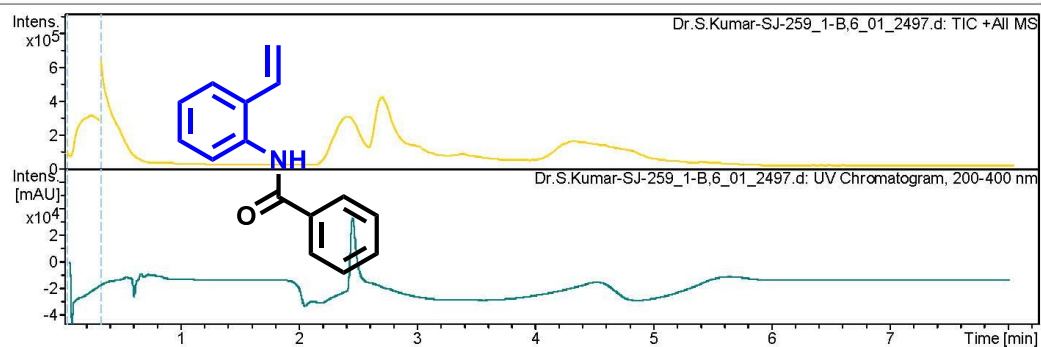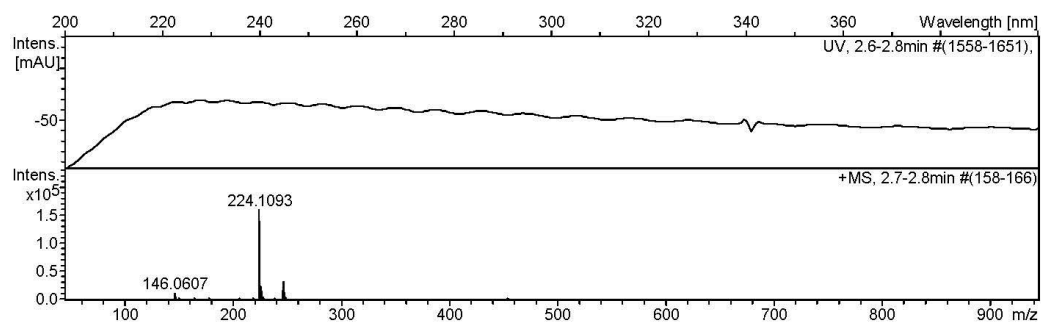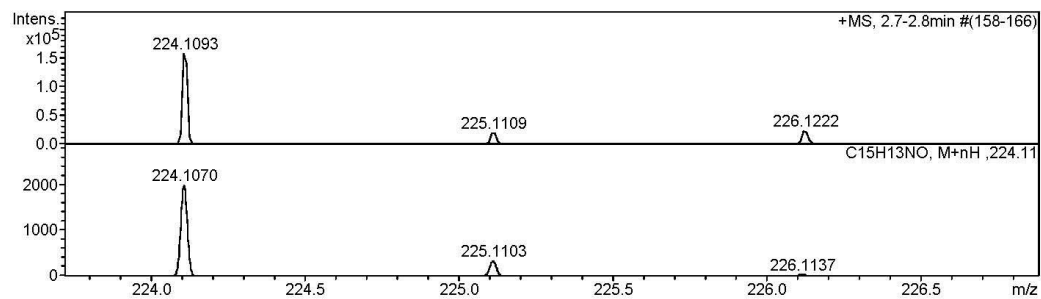

## Display Report

### Analysis Info

Analysis Name D:\Data\user data\2015\April-2015\22-April-2015\Dr.S.Kumar-AA-142.d  
Method tune\_low.m  
Sample Name AA-142  
Comment

Acquisition Date 4/23/2015 4:13:32 PM

Operator RUCHI

Instrument micrOTOF-Q II 10330

### Acquisition Parameter

|             |            |                       |           |                  |           |
|-------------|------------|-----------------------|-----------|------------------|-----------|
| Source Type | ESI        | Ion Polarity          | Positive  | Set Nebulizer    | 0.4 Bar   |
| Focus       | Not active | Set Capillary         | 4600 V    | Set Dry Heater   | 180 °C    |
| Scan Begin  | 50 m/z     | Set End Plate Offset  | -500 V    | Set Dry Gas      | 4.0 l/min |
| Scan End    | 3000 m/z   | Set Collision Cell RF | 130.0 Vpp | Set Divert Valve | Waste     |

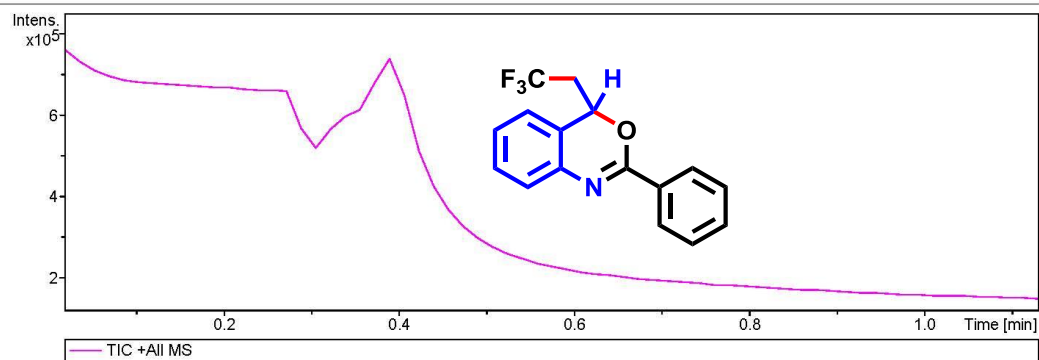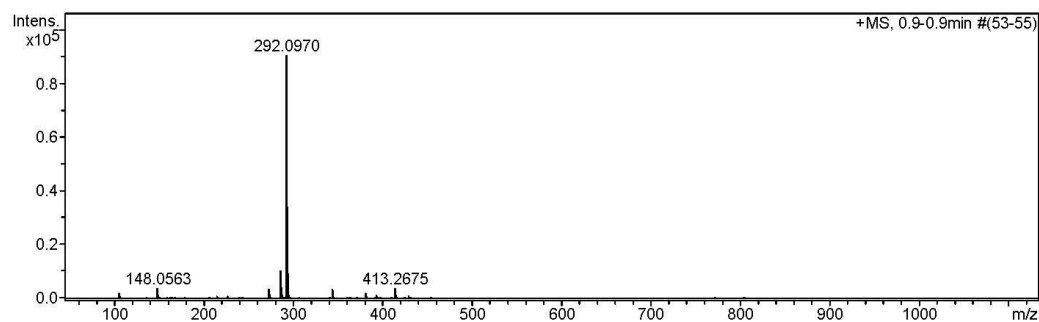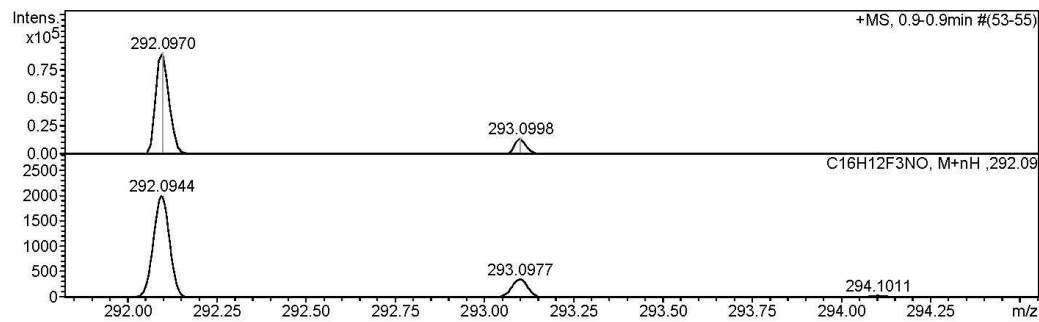

## Display Report

### Analysis Info

|                  |                                                                               |
|------------------|-------------------------------------------------------------------------------|
| Analysis Name    | D:\Data\user data\2015\MAY-2015\08-MAY-2015\Dr.S.Kapur-AA-164_1-A,5_01_2421.d |
| Method           | HRLCMS-20 Sept.m                                                              |
| Sample Name      | Dr.S.Kapur-AA-164                                                             |
| Comment          |                                                                               |
| Acquisition Date | 5/8/2015 2:40:55 PM                                                           |
| Operator         | RUCHI                                                                         |
| Instrument       | micrOTOF-Q II 10330                                                           |

### Acquisition Parameter

|             |          |                       |           |
|-------------|----------|-----------------------|-----------|
| Source Type | ESI      | Ion Polarity          | Positive  |
| Focus       | Active   | Set Capillary         | 4500 V    |
| Scan Begin  | 50 m/z   | Set End Plate Offset  | -500 V    |
| Scan End    | 3000 m/z | Set Collision Cell RF | 130.0 Vpp |
|             |          | Set Nebulizer         | 1.2 Bar   |
|             |          | Set Dry Heater        | 200 °C    |
|             |          | Set Dry Gas           | 7.0 l/min |
|             |          | Set Divert Valve      | Waste     |

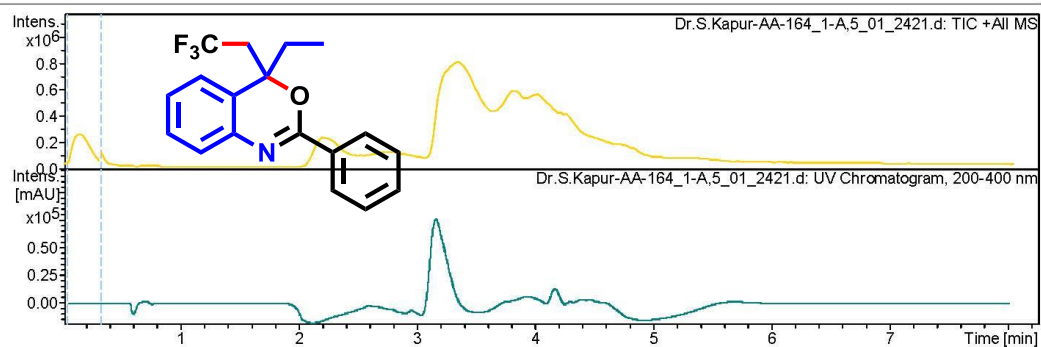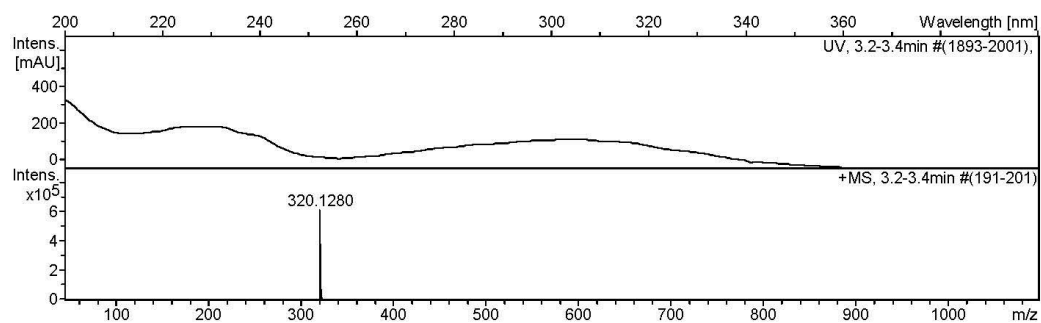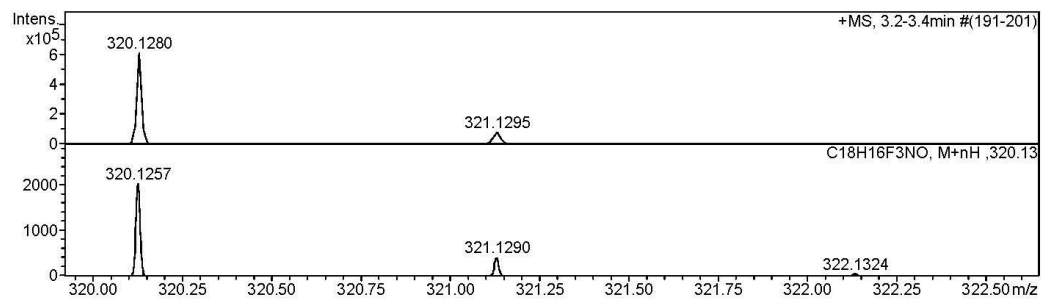

## Display Report

### Analysis Info

|                  |                                                                               |
|------------------|-------------------------------------------------------------------------------|
| Analysis Name    | D:\Data\user data\2015\MAY-2015\07-MAY-2015\Dr.S.Kumar-AA-161_1-C,4_01_2412.d |
| Method           | HRLCMS-20 Sept.m                                                              |
| Sample Name      | Dr.S.Kumar-AA-161                                                             |
| Comment          |                                                                               |
| Acquisition Date | 5/7/2015 3:11:45 PM                                                           |
| Operator         | RUCHI                                                                         |
| Instrument       | microTOF-Q II 10330                                                           |

### Acquisition Parameter

|             |          |                       |           |
|-------------|----------|-----------------------|-----------|
| Source Type | ESI      | Ion Polarity          | Positive  |
| Focus       | Active   | Set Capillary         | 4500 V    |
| Scan Begin  | 50 m/z   | Set End Plate Offset  | -500 V    |
| Scan End    | 3000 m/z | Set Collision Cell RF | 130.0 Vpp |
|             |          | Set Nebulizer         | 1.2 Bar   |
|             |          | Set Dry Heater        | 200 °C    |
|             |          | Set Dry Gas           | 7.0 l/min |
|             |          | Set Divert Valve      | Waste     |

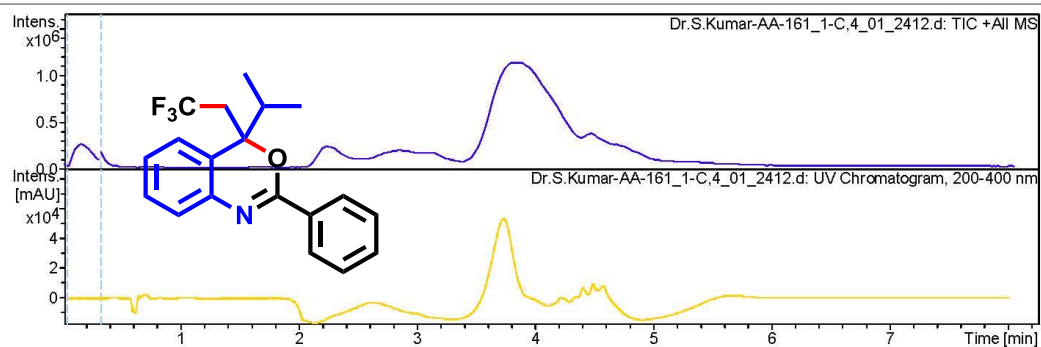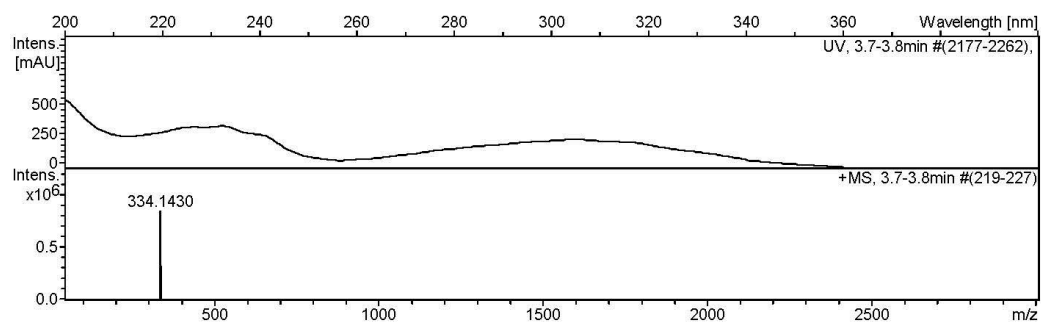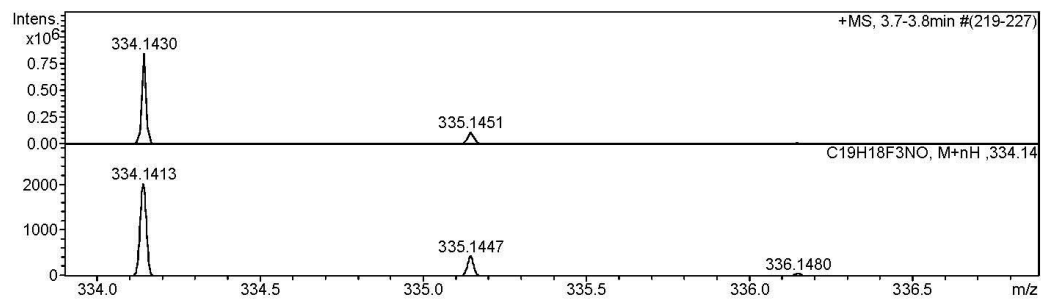



## Display Report

### Analysis Info

|                  |                                                                                  |
|------------------|----------------------------------------------------------------------------------|
| Analysis Name    | D:\Data\user data\2015\MAY-2015\19-MAY-2015\Dr.S.Kumar-AA-161-LS_1-A,2_01_2540.d |
| Method           | HRLCMS-20 Sept.m                                                                 |
| Sample Name      | Dr.S.Kumar-AA-161-LS                                                             |
| Comment          |                                                                                  |
| Acquisition Date | 5/19/2015 11:21:22 AM                                                            |
| Operator         | RUCHI                                                                            |
| Instrument       | microTOF-Q II 10330                                                              |

### Acquisition Parameter

|             |          |                       |           |
|-------------|----------|-----------------------|-----------|
| Source Type | ESI      | Ion Polarity          | Positive  |
| Focus       | Active   | Set Capillary         | 4500 V    |
| Scan Begin  | 50 m/z   | Set End Plate Offset  | -500 V    |
| Scan End    | 3000 m/z | Set Collision Cell RF | 130.0 Vpp |
|             |          | Set Nebulizer         | 1.2 Bar   |
|             |          | Set Dry Heater        | 200 °C    |
|             |          | Set Dry Gas           | 7.0 l/min |
|             |          | Set Divert Valve      | Waste     |

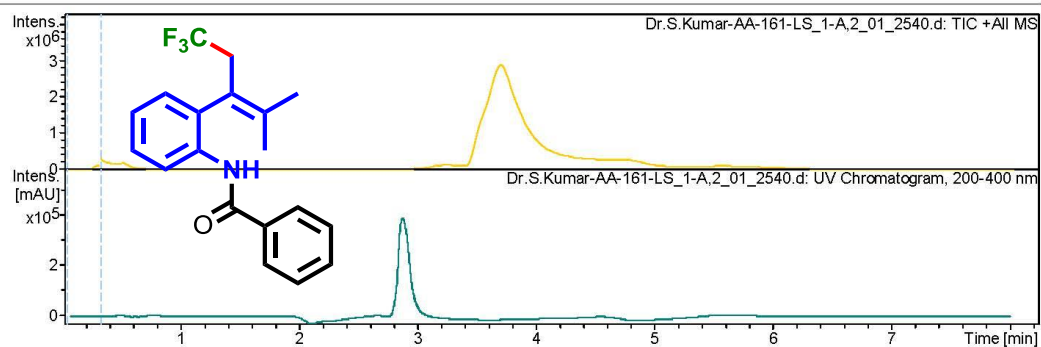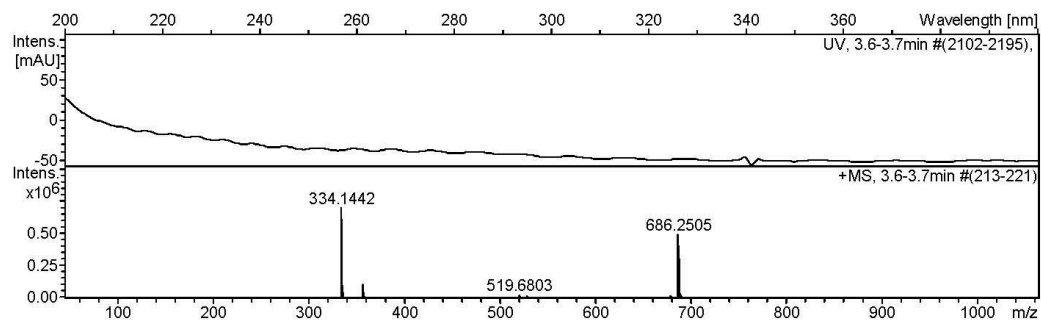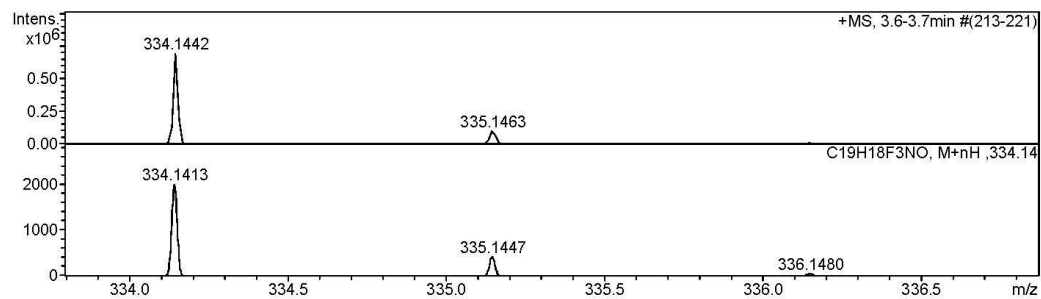

## Display Report

### Analysis Info

|               |                                                                                     |                  |                       |
|---------------|-------------------------------------------------------------------------------------|------------------|-----------------------|
| Analysis Name | D:\Data\user data\2015\MAY-2015\19-MAY-2015\Dr.S.Kumar-SK-01-453-IV_1-A,7_01_2546.d | Acquisition Date | 5/19/2015 12:22:32 PM |
| Method        | HRLCMS-20 Sept.m                                                                    | Operator         | RUCHI                 |
| Sample Name   | Dr.S.Kumar-SK-01-453-IV                                                             | Instrument       | microTOF-Q II 10330   |
| Comment       |                                                                                     |                  |                       |

### Acquisition Parameter

|             |          |                       |           |                  |           |
|-------------|----------|-----------------------|-----------|------------------|-----------|
| Source Type | ESI      | Ion Polarity          | Positive  | Set Nebulizer    | 1.2 Bar   |
| Focus       | Active   | Set Capillary         | 4500 V    | Set Dry Heater   | 200 °C    |
| Scan Begin  | 50 m/z   | Set End Plate Offset  | -500 V    | Set Dry Gas      | 7.0 l/min |
| Scan End    | 3000 m/z | Set Collision Cell RF | 130.0 Vpp | Set Divert Valve | Waste     |

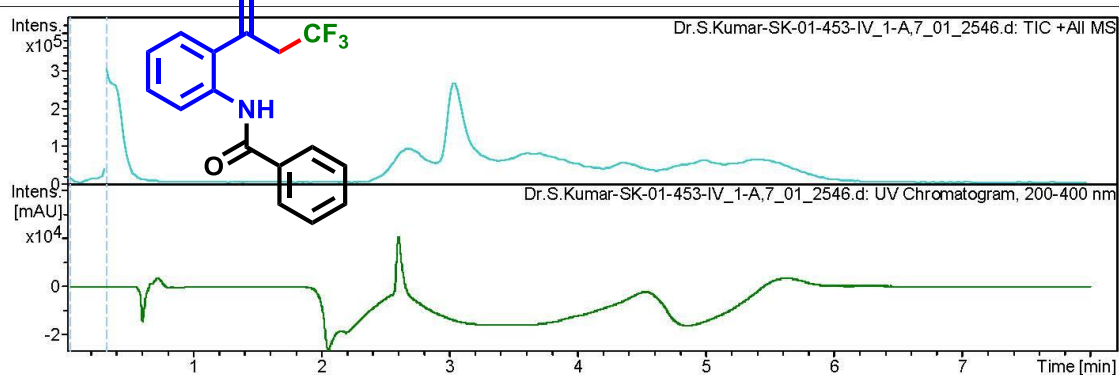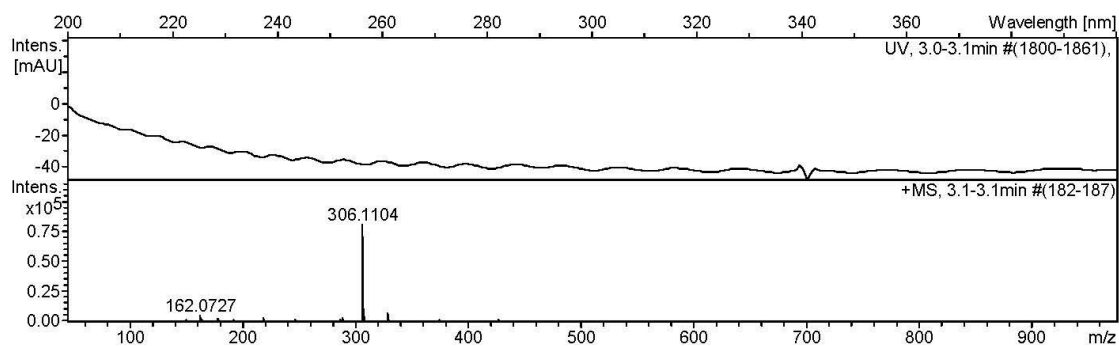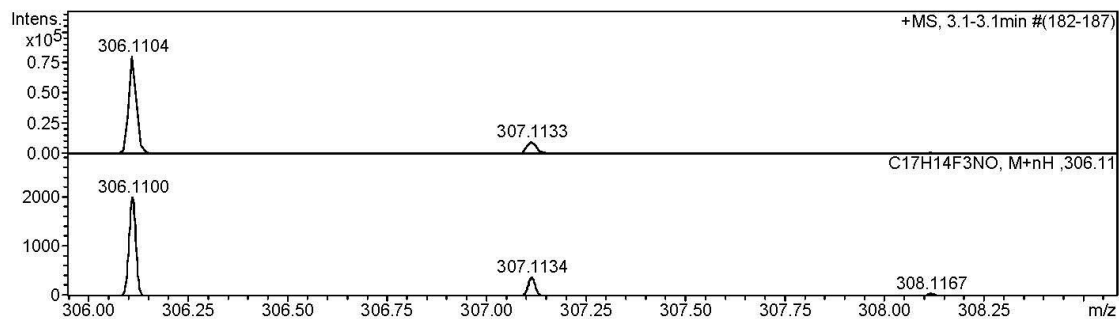

## Display Report

### Analysis Info

Analysis Name D:\Data\user data\2015\MAY-2015\13-MAY-2015\Dr.S.Kumar-SK-01-443-VE-A.d  
Method tune\_low\_neg.m  
Sample Name SK-01-443-VE-A  
Comment

Acquisition Date 5/13/2015 4:59:00 PM

Operator RUCHI

Instrument micrOTOF-Q II 10330

### Acquisition Parameter

|             |            |                       |           |                  |           |
|-------------|------------|-----------------------|-----------|------------------|-----------|
| Source Type | ESI        | Ion Polarity          | Negative  | Set Nebulizer    | 0.4 Bar   |
| Focus       | Not active | Set Capillary         | 2500 V    | Set Dry Heater   | 180 °C    |
| Scan Begin  | 50 m/z     | Set End Plate Offset  | -500 V    | Set Dry Gas      | 4.0 l/min |
| Scan End    | 3000 m/z   | Set Collision Cell RF | 130.0 Vpp | Set Divert Valve | Waste     |

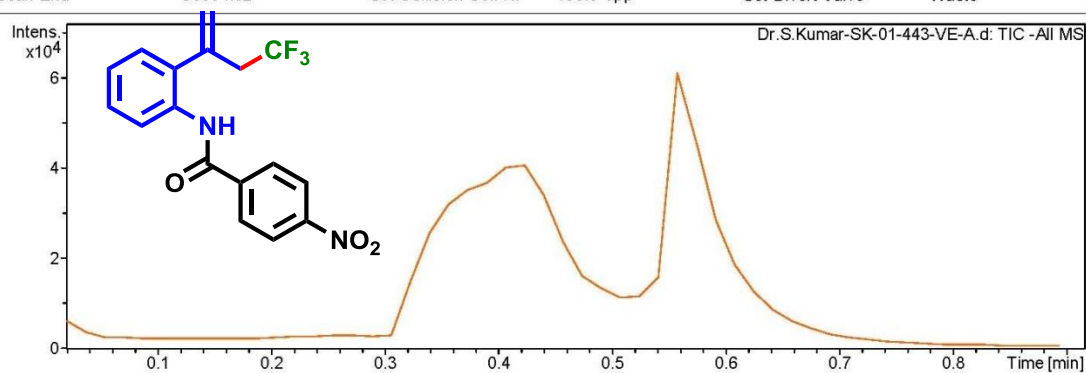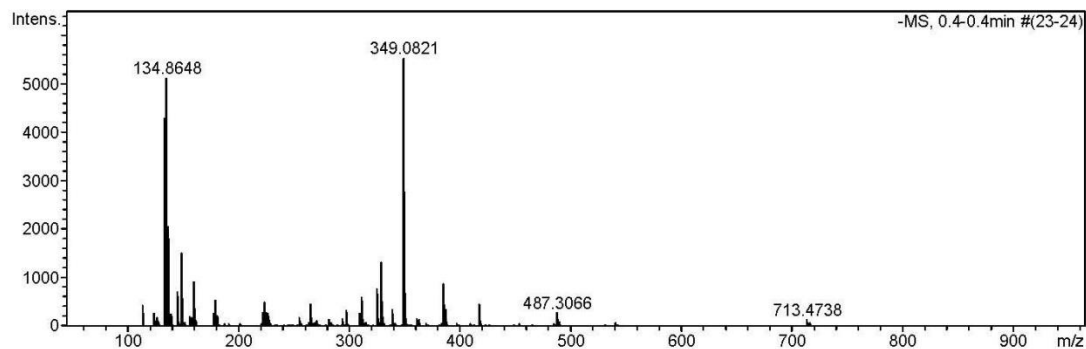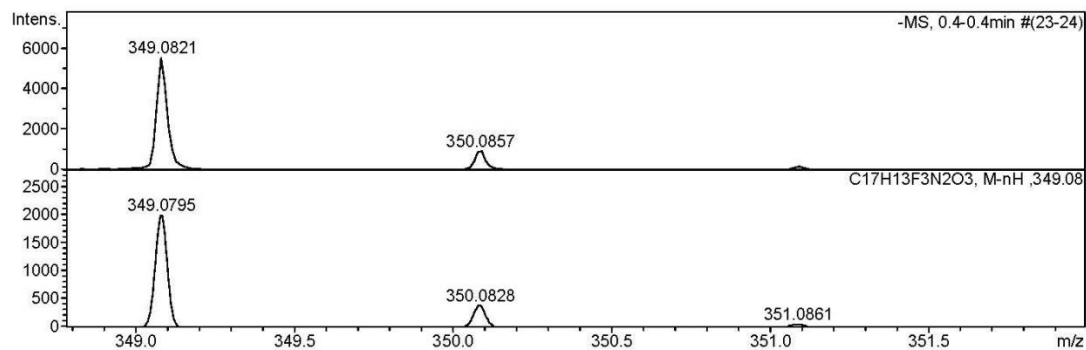

## Display Report

### Analysis Info

|               |                                                                         |                  |                      |
|---------------|-------------------------------------------------------------------------|------------------|----------------------|
| Analysis Name | D:\Data\user data\2015\MAY-2015\13-MAY-2015\Dr.S.Kumar-SK-01-444-VE-A.d | Acquisition Date | 5/13/2015 5:00:50 PM |
| Method        | tune_low_neg.m                                                          | Operator         | RUCHI                |
| Sample Name   | SK-01-444-VE-A                                                          | Instrument       | micrOTOF-Q II 10330  |
| Comment       |                                                                         |                  |                      |

### Acquisition Parameter

|             |            |                       |           |                  |           |
|-------------|------------|-----------------------|-----------|------------------|-----------|
| Source Type | ESI        | Ion Polarity          | Negative  | Set Nebulizer    | 0.4 Bar   |
| Focus       | Not active | Set Capillary         | 2500 V    | Set Dry Heater   | 180 °C    |
| Scan Begin  | 50 m/z     | Set End Plate Offset  | -500 V    | Set Dry Gas      | 4.0 l/min |
| Scan End    | 3000 m/z   | Set Collision Cell RF | 130.0 Vpp | Set Divert Valve | Waste     |

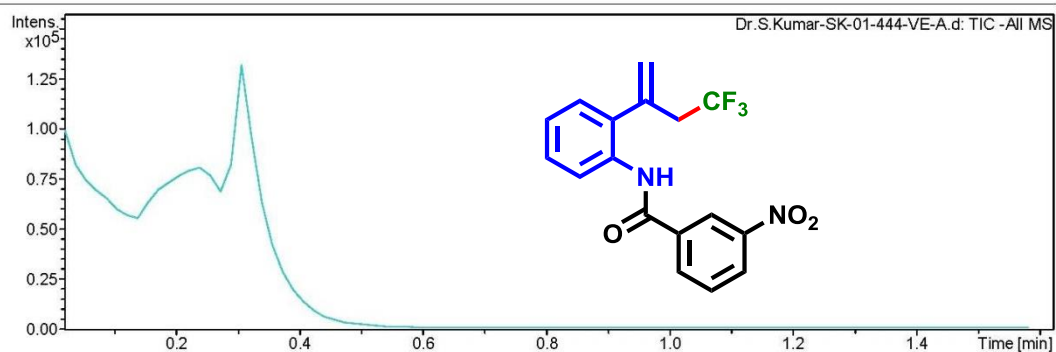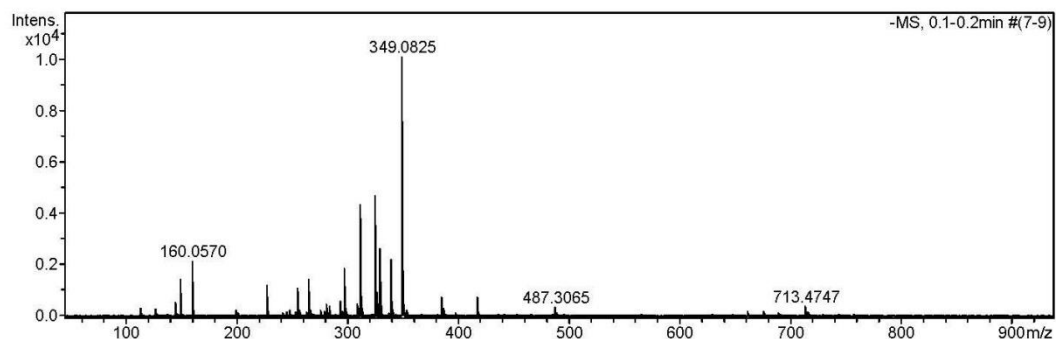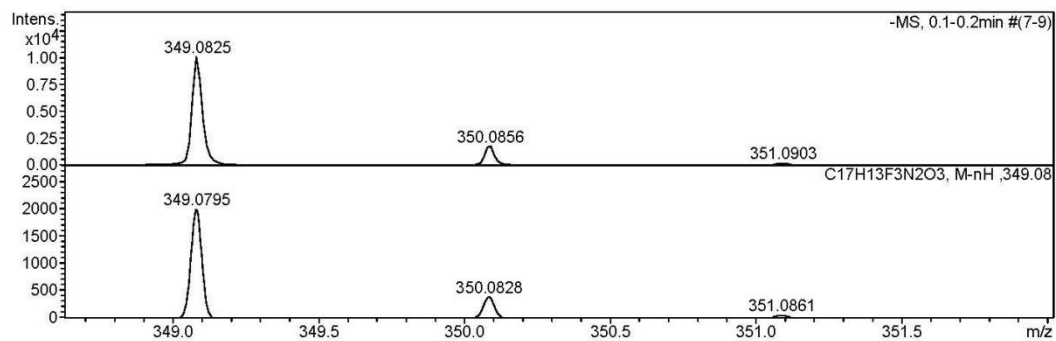

## Display Report

### Analysis Info

|               |                                                                                  |                  |                       |
|---------------|----------------------------------------------------------------------------------|------------------|-----------------------|
| Analysis Name | D:\Data\user data\2015\MAY-2015\19-MAY-2015\Dr.S.Kumar-SJ-340-II_1-A,3_01_2541.d | Acquisition Date | 5/19/2015 11:30:36 AM |
| Method        | HRLCMS-20 Sept.m                                                                 | Operator         | RUCHI                 |
| Sample Name   | Dr.S.Kumar-SJ-340-II                                                             | Instrument       | micrOTOF-Q II 10330   |
| Comment       |                                                                                  |                  |                       |

### Acquisition Parameter

|             |          |                       |           |                  |           |
|-------------|----------|-----------------------|-----------|------------------|-----------|
| Source Type | ESI      | Ion Polarity          | Positive  | Set Nebulizer    | 1.2 Bar   |
| Focus       | Active   | Set Capillary         | 4500 V    | Set Dry Heater   | 200 °C    |
| Scan Begin  | 50 m/z   | Set End Plate Offset  | -500 V    | Set Dry Gas      | 7.0 l/min |
| Scan End    | 3000 m/z | Set Collision Cell RF | 130.0 Vpp | Set Divert Valve | Waste     |

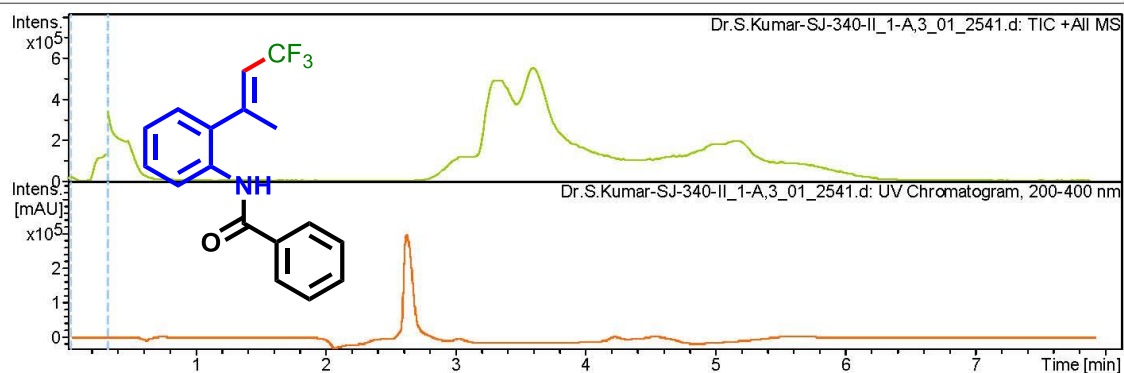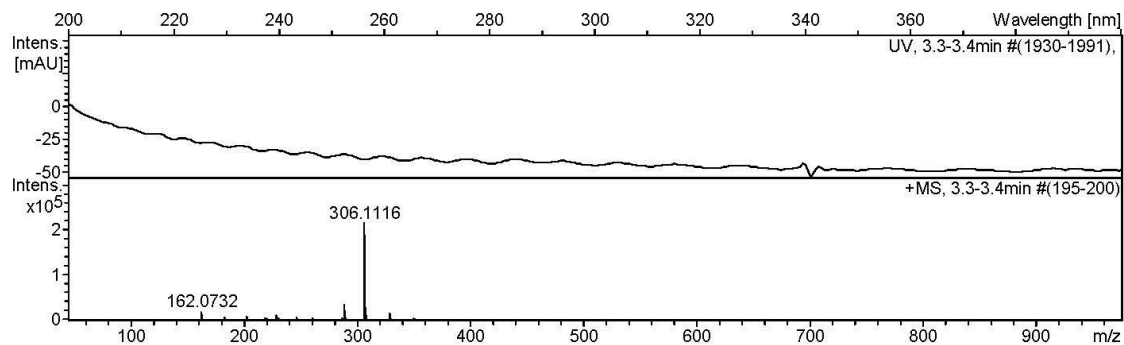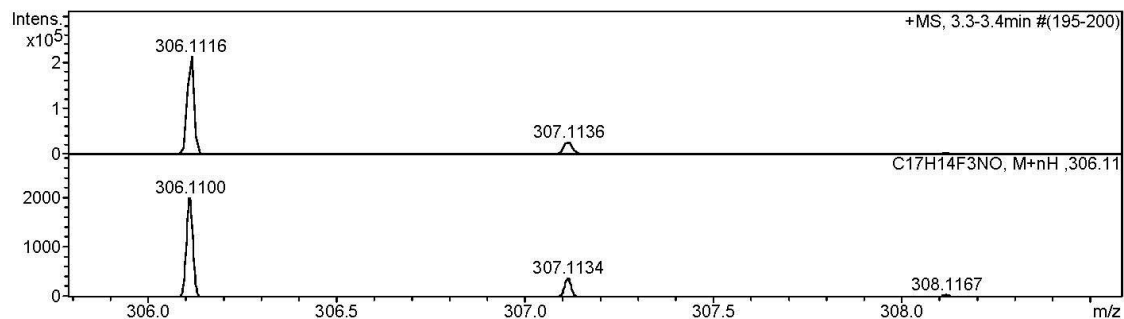

## Display Report

### Analysis Info

Analysis Name D:\Data\user data\2014\SEPT\16 SEPT\Dr.S.Kumar-SJ-231-III-VE.d  
 Method tune\_low.m  
 Sample Name SJ-231-III-VE  
 Comment

Acquisition Date 9/16/2014 3:06:06 PM

Operator RUCHI

Instrument microTOF-Q II 10330

### Acquisition Parameter

|             |            |                       |           |                  |           |
|-------------|------------|-----------------------|-----------|------------------|-----------|
| Source Type | ESI        | Ion Polarity          | Negative  | Set Nebulizer    | 0.4 Bar   |
| Focus       | Not active | Set Capillary         | 2500 V    | Set Dry Heater   | 180 °C    |
| Scan Begin  | 50 m/z     | Set End Plate Offset  | -500 V    | Set Dry Gas      | 4.0 l/min |
| Scan End    | 3000 m/z   | Set Collision Cell RF | 150.0 Vpp | Set Divert Valve | Waste     |

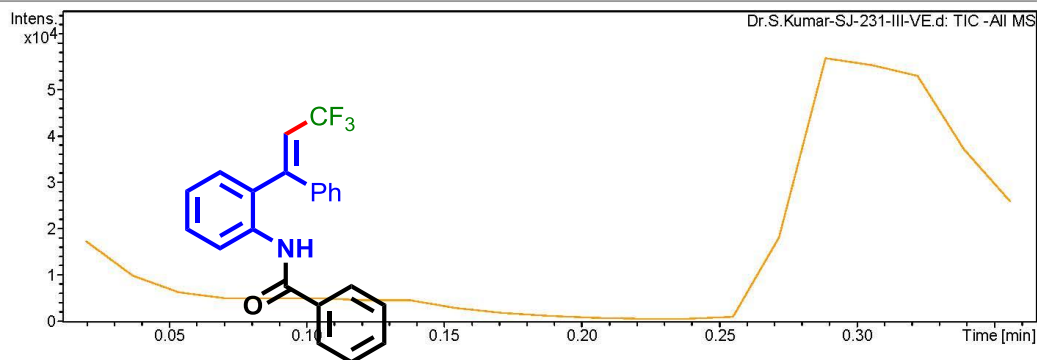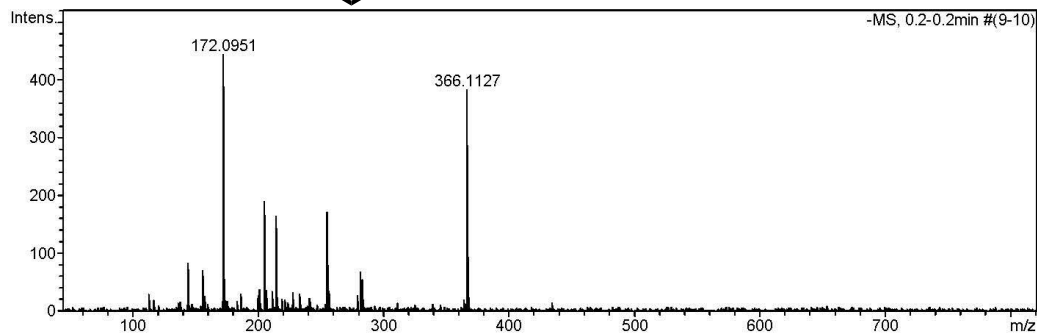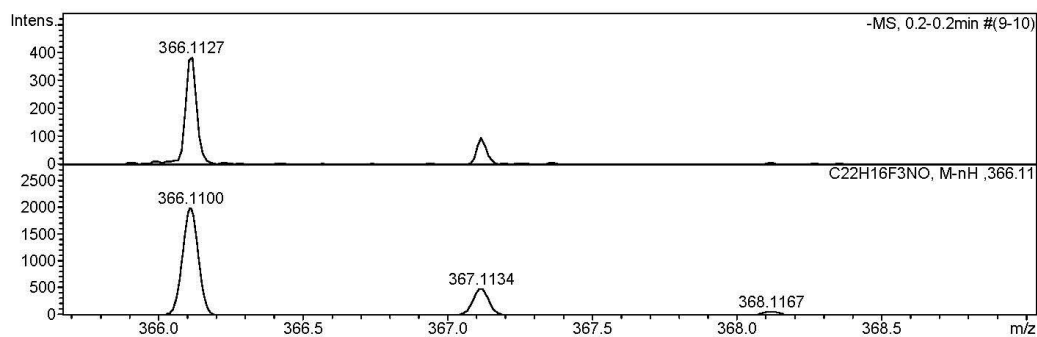

Supplement: c5ob01196e2.pdf [file c5ob01196e2.pdf]
